# Supplementary material for: O-GlcNAc transferase acts as a critical nutritional node for the control of liver homeostasis
Source: PubMed Central journal article supplement — JHEP Rep. 2023 Aug 12;6(2):100878. doi: 10.1016/j.jhepr.2023.100878 (PMC10827605; doi:10.1016/j.jhepr.2023.100878), 2023-08-12

# **O-GlcNAc transferase acts as a critical nutritional node for the control of liver homeostasis**

Paula Ortega-Prieto, Lucia Parlati, Fadila Benhamed, Marion Regnier, Isadora Cavalcante, Mélanie Montabord, Rachel Onifarasoaniaina, Maryline Favier, Natasa Pavlovic, Julie Magusto, Michèle Cauzac, Patrick Pagesy, Jérémie Gautheron, Chantal Desdouets, Sandra Guilmeau, Tarik Issad, Catherine Postic

## Table of contents

|                                   |    |
|-----------------------------------|----|
| Supplementary figure legends..... | 2  |
| Supplementary table legends.....  | 6  |
| Supplementary figures.....        | 7  |
| Supplementary tables.....         | 16 |

## Supplementary figure legends

21 **Fig. S1. Physiological parameters in 4 week-old OGT<sup>LWT</sup> and OGT<sup>LKO</sup> mice.** Male liver-  
22 specific *Ogt* knockout (OGT<sup>LKO</sup>) and control floxed littermates (OGT<sup>LWT</sup>) mice were studied 4  
23 weeks after birth. **A.** Fasting blood glucose (5 hours) (mmol/L). **B.** Glucose tolerance test. The  
24 area under the curve (AUC) is shown. **C.** Pyruvate tolerance test. The area under the curve  
25 (AUC) is shown. **D.** Insulin tolerance test. The area under the curve (AUC) is shown. **E.**  
26 Western blot analysis of Foxo1 (whole lysate), Foxo1O-GlcNAcylation levels (WGA) and  
27 global O-GlcNAcylation in liver of OGT<sup>LWT</sup> and OGT<sup>LKO</sup> mice. Actin was used as loading  
28 control. Three representative samples are presented per condition. **F.** Relative expression levels  
29 of gluconeogenic genes normalized to TBP. Data are shown as Mean  $\pm$  SEM of 6-8 male mice.  
30 \*P < 0.05; \*\*P < 0.01; \*\*\*P < 0.001 by unpaired Student t-test (Mann-Whitney U test).

31  
32 **Fig. S2. Liver injury and cell identity assessment in OGT<sup>LKO</sup> mice.** Male liver-specific  
33 *Ogt* knockout (OGT<sup>LKO</sup>) and control floxed littermates (OGT<sup>LWT</sup>) mice were studied 8 weeks  
34 after birth in the fed state. **A.** Relative expression of *Oga* normalized to TBP **B.** Relative  
35 expression levels of proliferation markers normalized to TBP. **C.** Western blot analysis of  
36 proliferation markers. Three representative samples are shown. Actin was used as a loading  
37 control. **D.** Liver section of mice without macroscopic nodular phenotype stained with HE,  
38 Sirius red and OGT. **E.** Serum levels of aspartate aminotransferase (AST), total and direct  
39 bilirubin and alkaline phosphatase (ALP) in mice 8 weeks after birth. **F.** Representation of  
40 hepatoblast differentiation into hepatocytes or cholangiocytes. Markers used for cell  
41 characterization are represented under each cellular type. **G.** Relative expression of cell identity  
42 markers in livers from OGT<sup>LWT</sup> compared to OGT<sup>LKO</sup> mice at 4 and 8 weeks. TBP was used as  
43 a housekeeping gene. **H.** Liver sections of 8 week-old mice stained with HNF4 $\alpha$ , SOX9 and

44 Krt19 antibodies. Scale bars = 100  $\mu$ m on the two upper sections. Detailed zoom is shown in  
45 the bottom sections with a scale bar = 50 $\mu$ m. PV: Portal vein. CV: Central vein. Data are  
46 represented as Mean  $\pm$  SEM of 8-10 mice at 4 weeks and 13-15 mice at 8 weeks. \*\*P < 0.01;  
47 \*\*\*P < 0.001 by unpaired Student t-test (Mann-Whitney U test) comparing OGT<sup>LWT</sup> and OGT<sup>LKO</sup> at  
48 the same age (Panels A, B, E). \*\*P < 0.01; \*\*\*P < 0.001 by two-way ANOVA followed by Bonferroni  
post hoc test (panel G).

49

50 **Fig. S3. Female OGT<sup>LKO</sup> mice exhibit severe liver damage.**

51 Female liver-specific *Ogt* knockout (OGT<sup>LKO</sup>) and control floxed littermates (OGT<sup>LWT</sup>) mice  
52 were studied 8 weeks after birth in the fed state. **A.** Fed blood glucose (mmol/L), body (g), liver  
53 and spleen weights are shown. Liver and spleen weight are represented as percentage of body  
54 weight. **B.** Relative expression levels of *Ogt* normalized to TBP. **C.** Western blot analysis of  
55 OGT and CHOP protein content in liver of OGT<sup>LWT</sup> and OGT<sup>LKO</sup> mice. Four representative  
56 samples are shown. Actin was used as a loading control. **D.** Liver sections stained with  
57 hematoxylin-eosin (HE), Sirius red,  $\alpha$ SMA, OGT, Ki67 and SOX9. Scale bars = 100  $\mu$ m. **E.**  
58 Relative expression levels of inflammatory markers normalized to TBP. **F.** Relative expression  
59 levels of fibrosis markers normalized to TBP. **G.** Relative expression levels of oxidative stress  
60 markers normalized to TBP. **H.** Serum levels of alanine aminotransferase (ALT). Data are  
61 shown as Mean  $\pm$  SEM of 5 female mice per condition. \*P < 0.05; \*\*P < 0.01; \*\*\*P < 0.001;  
62 \*\*\*\*P < 0.0005 by unpaired Student t-test (Mann-Whitney U test).

63

64 **Fig. S4. Heatmaps of oxidative stress, necroptosis, DNA repair and extracellular matrix.**

65 **A.** Microarray results of genes involved in oxidative stress. **B.** Microarray results of genes  
66 involved in necroptosis. **C.** Microarray results of genes involved in DNA repair. **D.** Microarray  
67 results of significant changing genes involved in extracellular matrix formation. Genes found  
68 significantly different (either down or up-regulated) between OGT<sup>LWT</sup> and OGT<sup>LKO</sup> are

69 indicated by an asterisk (\*). Differentially expressed (DE) gene cut-off was set for a fold change  
70  $\geq |2|$  and False discovery rate (FDR) p-value  $< 0.05$ .

71  
72 **Fig. S5. Kinetics of inflammation, oxidative stress and ER stress markers in liver of**  
73 **OGT<sup>LWT</sup> and OGT<sup>LKO</sup> mice.** Male liver-specific *Ogt* knockout (OGT<sup>LKO</sup>) and control floxed  
74 littermates (OGT<sup>LWT</sup>) mice were studied 2, 4 or 8 weeks after birth in the fed state. **A.** Western  
75 blots showing protein content in whole liver lysates of inflammation (Phospho-JNK and total  
76 JNK), ER stress (CHOP) markers. Actin and/or HSP90 were used as loading controls. **B.**  
77 Relative expression levels of oxidative stress markers and of *Chop* normalized to TBP. Data  
78 are represented as Mean  $\pm$  SEM of 6 mice per group age. \*P  $< 0.05$ ; \*\*\*P  $< 0.001$ ; \*\*\*\*P  $<$   
79  $0.0005$  by two-way Anova followed by Bonferroni post hoc test.

80  
81 **Fig. S6. Persistent fibrosis and liver injury in 12 weeks and 12 months old OGT<sup>LKO</sup>**  
82 **mice.** Liver-specific *Ogt* knockout (OGT<sup>LKO</sup>) and control floxed littermates (OGT<sup>LWT</sup>) mice  
83 were studied 12 weeks and 12 months after birth in the fed state. **A.** Liver and spleen weights  
84 are shown and are represented as percentage of body weight. **B.** Relative expression levels of  
85 oxidative stress and inflammatory markers normalized to TBP. **C.** Liver sections stained with  
86 hematoxylin-eosin (HE) and F4/80. Scale bars = 100  $\mu\text{m}$ . **D.** Serum levels of alanine  
87 aminotransferase (ALT) of alkaline phosphatase (ALP) and lactate dehydrogenase (LDH). Data  
88 are shown as Mean  $\pm$  SEM of 18-20 individual male and female mice at 12 weeks and 12  
89 months. \*P  $< 0.05$ ; \*\*P  $< 0.01$ ; \*\*\*P  $< 0.001$  and \*\*\*\*P  $< 0.0005$  by two-way ANOVA followed by  
Bonferroni post hoc test.

90  
91  
92 **Fig. S7. Low carbohydrate high fat (LCHF) diet improves oxidative stress, ER stress**  
93 **and DNA damage but not fibrosis in OGT<sup>LKO</sup> mice.** **A.** Liver-specific *Ogt* knockout

94 (OGT<sup>LKO</sup>) and control floxed littermates (OGT<sup>LWT</sup>) mice were weaned (at 3 weeks of age) on a  
95 low carbohydrate high fat (LCHF in % of calories: 21% of carbohydrates, 60% of fat, 19% of  
96 proteins) diet and sacrificed 5 weeks later in the fed state. **B.** Body weight (g), liver and spleen  
97 weights are shown. Liver and spleen weights are represented as percentage of body weight. **C.**  
98 Serum concentrations of  $\beta$ -hydroxybutyrate. **D.** Relative expression levels of *Chop* normalized  
99 to TBP. **E.** Serum levels of Cxcl1. Data are shown as Mean  $\pm$  SEM of 4-12 mice (males and  
100 females). \*P < 0.05; \*\*\*P < 0.001; \*\*\*\*P < 0.0005 by two-way ANOVA followed by Bonferroni post  
101 hoc test.

102 **Fig. S8. Ketogenic diet (KD) improves oxidative stress, ER stress, DNA damage,**  
103 **hepatic fibrosis and liver injury in OGT<sup>LKO</sup> mice.** **A.** Liver-specific *Ogt* knockout (OGT<sup>LKO</sup>)  
104 and control floxed littermates (OGT<sup>LWT</sup>) were weaned (at 3 weeks of age) on a ketogenic diet  
105 (KD: 1% of carbohydrates, 94% of fat, 5% of protein) and sacrificed 5 weeks later in the fed  
106 state. **B.** Body weight (g), liver and spleen weights are shown. Liver and spleen weights are  
107 represented as percentage of body weight. **C.** Serum concentrations of  $\beta$ -hydroxybutyrate. **D.**  
108 Relative expression levels of *Chop* normalized to TBP. Data are shown as Mean  $\pm$  SEM of 4-8  
109 mice (males and females). \*\*\*P < 0.001; \*\*\*\*P < 0.0005 by two-way ANOVA followed by  
Bonferroni post hoc test.

110

111

112 **Fig. S9. Lipidomic analysis in liver of OGT<sup>LWT</sup> and OGT<sup>LKO</sup> mice fed on SD, LCHF or**  
113 **KD diets.** **A.** Heat map of lipid species in liver from OGT<sup>LWT</sup> and OGT<sup>LKO</sup> mice fed at weaning  
114 for 5 weeks with a LCHF diet. Specific clusters are indicated. **B.** Heat map of lipid species in  
115 liver from OGT<sup>LWT</sup> and OGT<sup>LKO</sup> fed for 5 weeks at weaning with a KD diet. Specific clusters  
116 are indicated. Data are shown as Mean  $\pm$  SEM of 4-12 mice (males and females).

117

118

## Supplementary table legends

119 **Table S1. Differentially expressed genes at 4 weeks**

120 **Table S2. Differentially expressed genes at 8 weeks**

121 **Table S3. Differentially expressed genes common to 4 and 8 weeks**

123 **Table S4. List of primers used for qPCR**

124

125

126

127

128

129

130

Supplementary figures

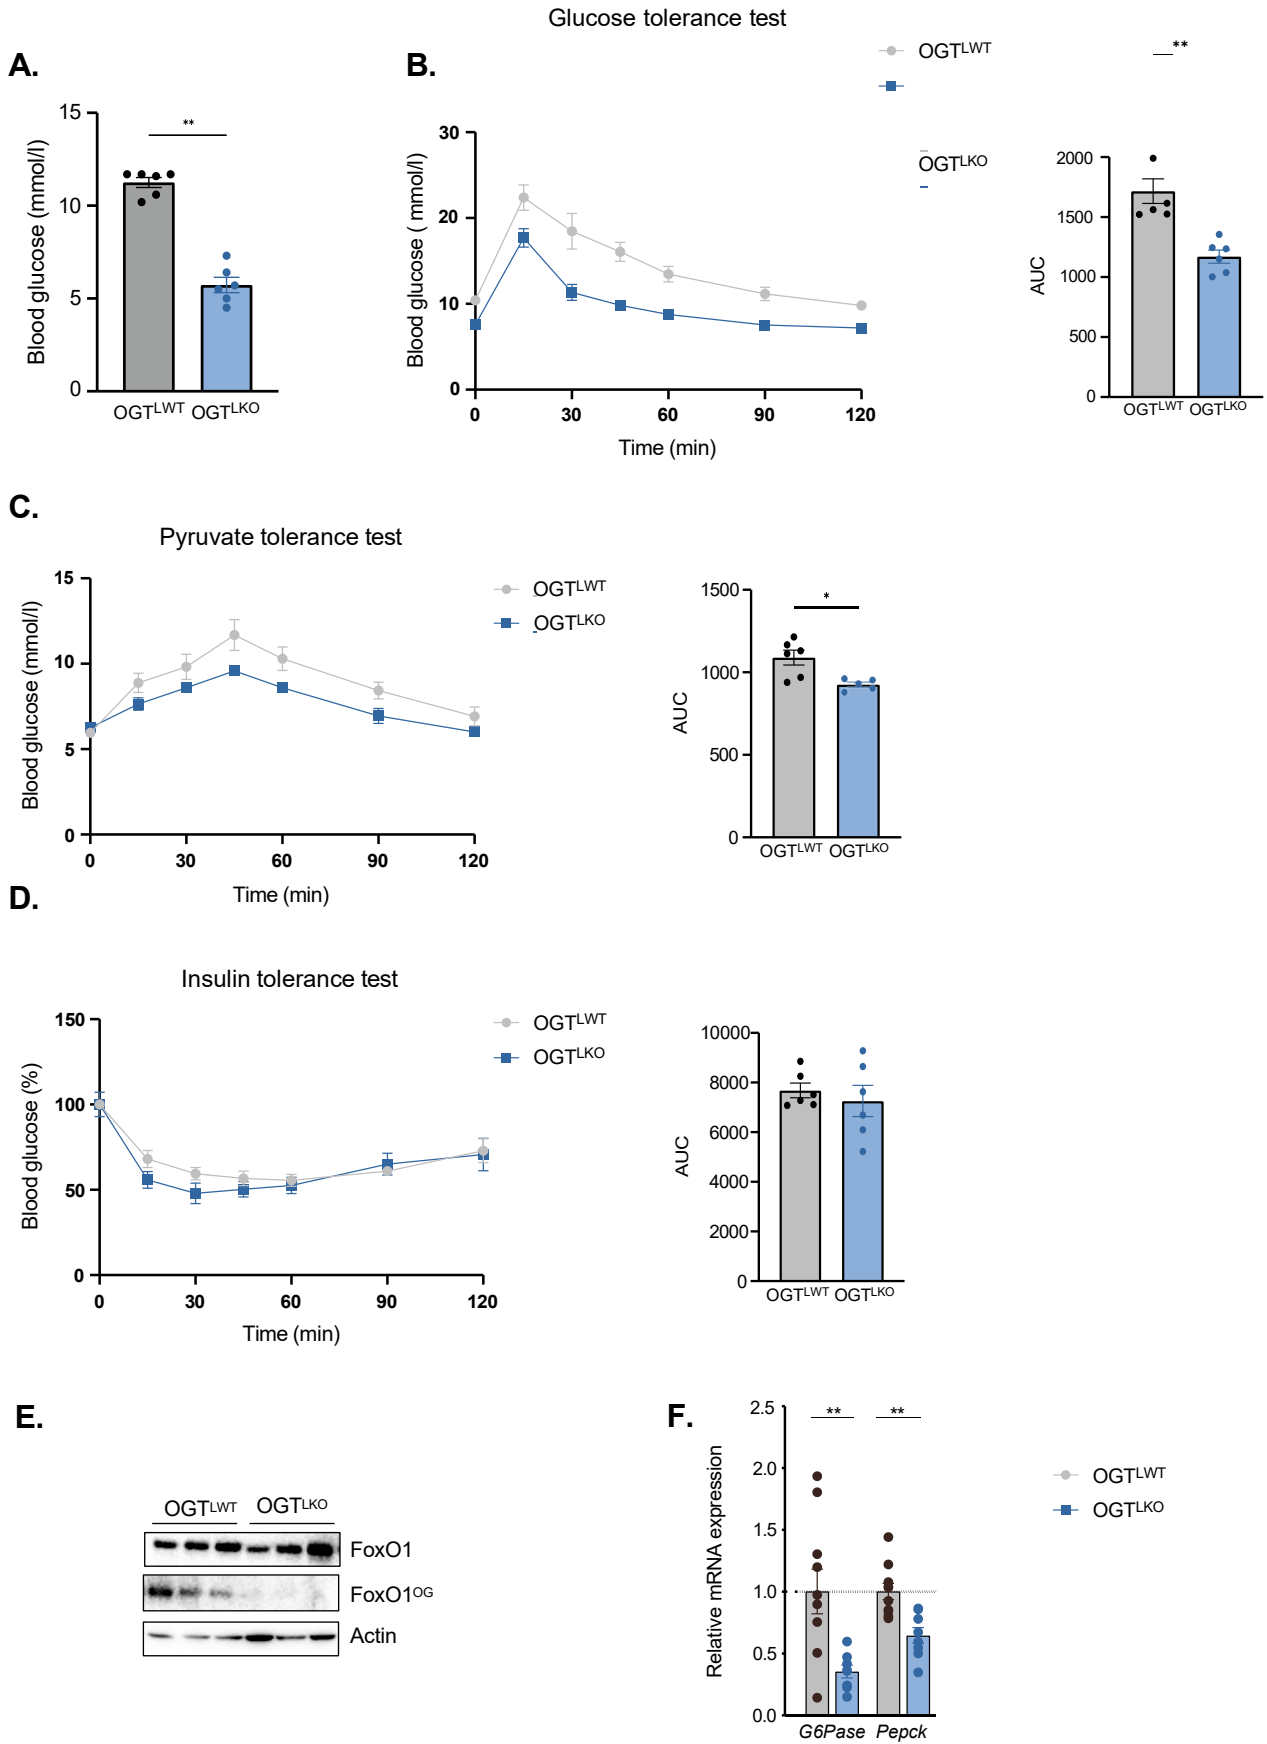

Fig. S1

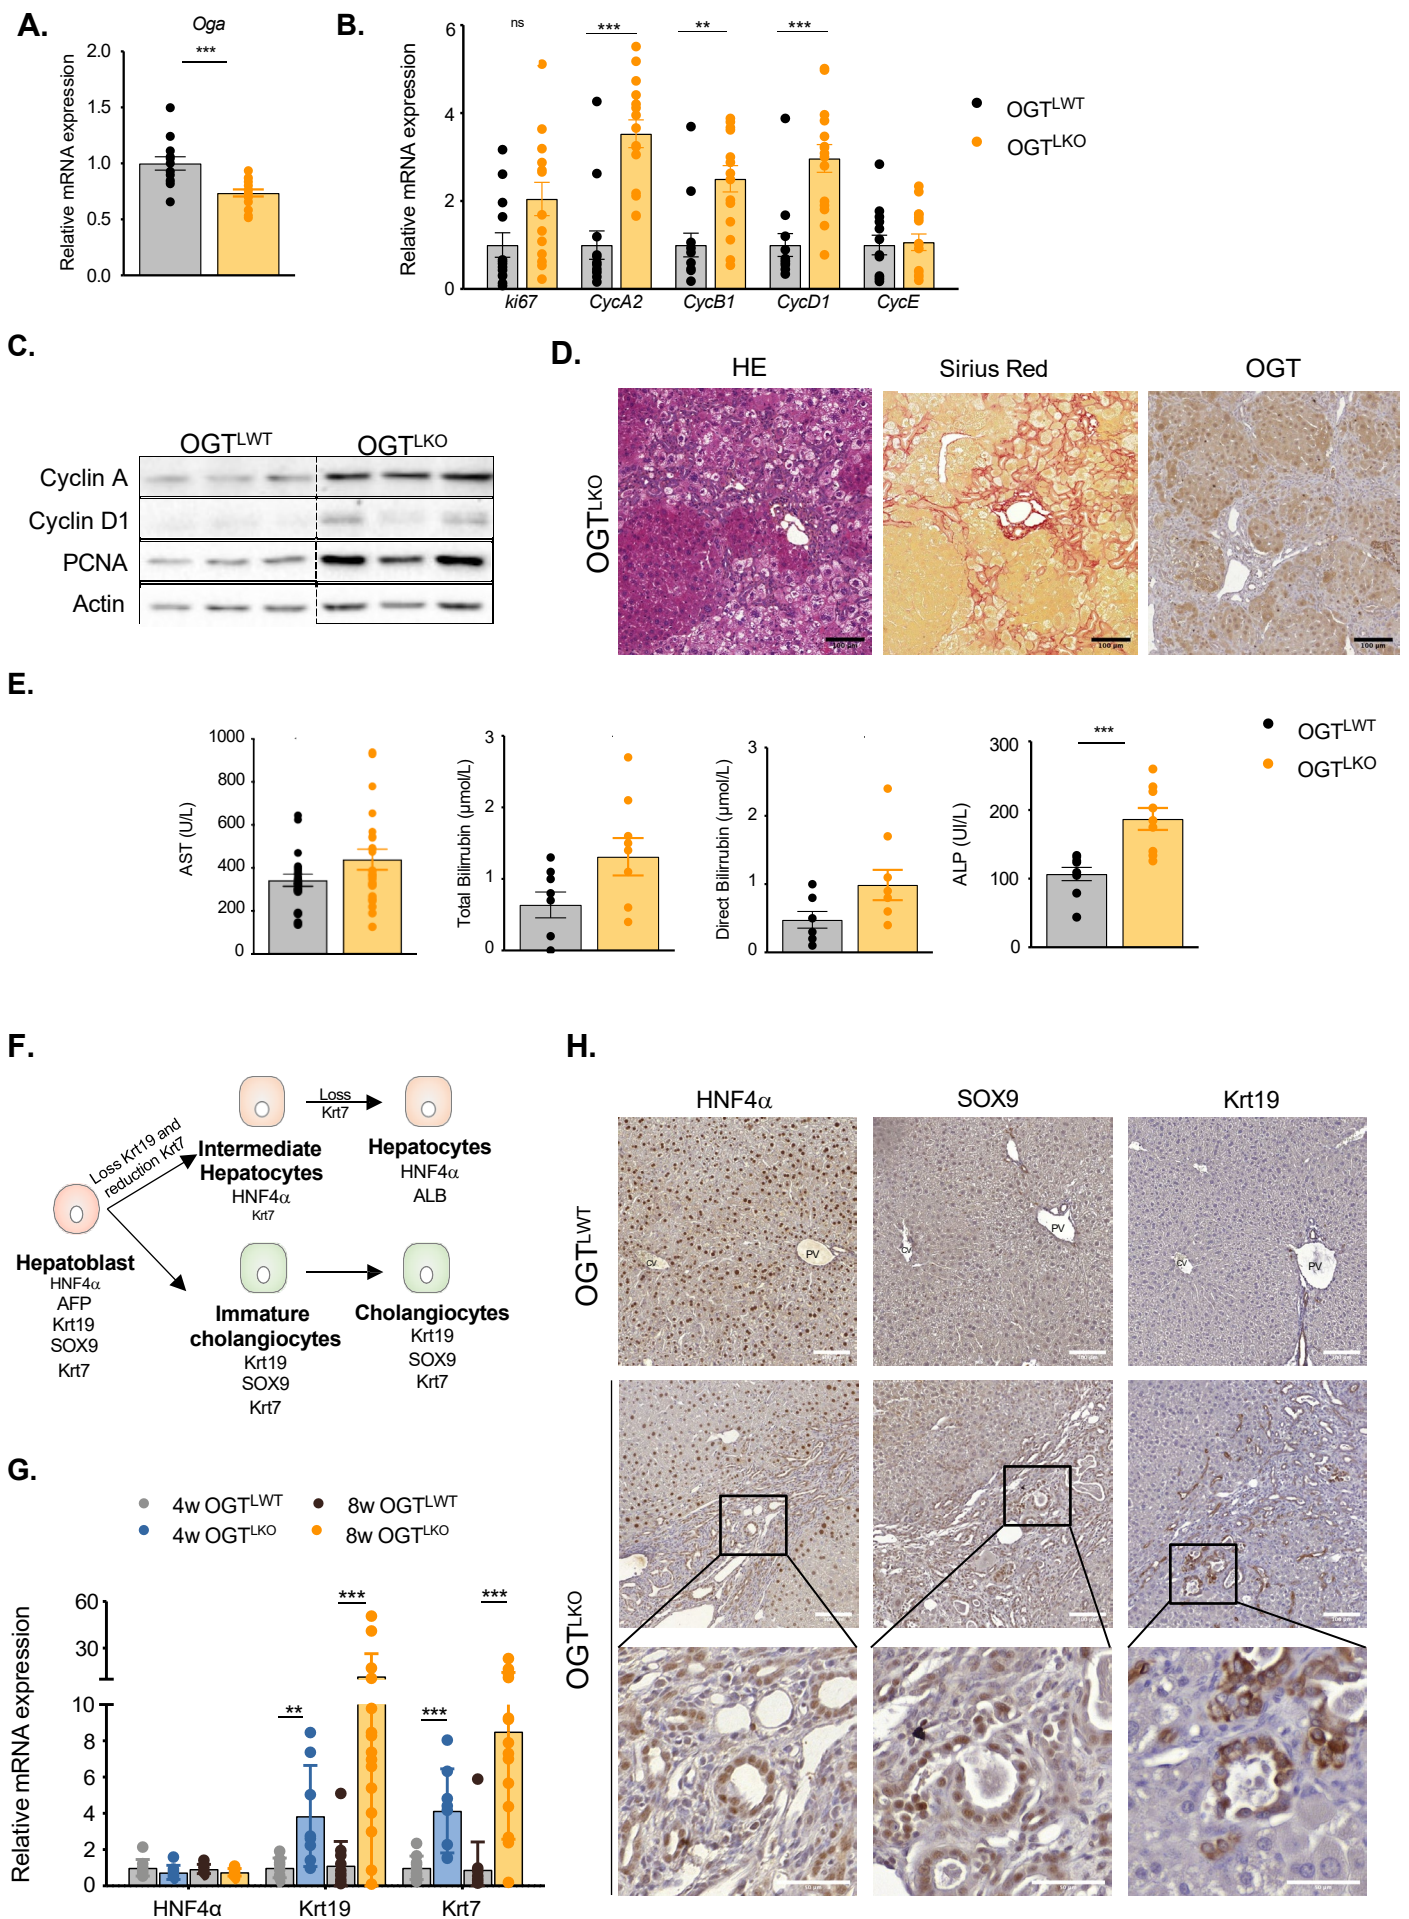

Fig. S2



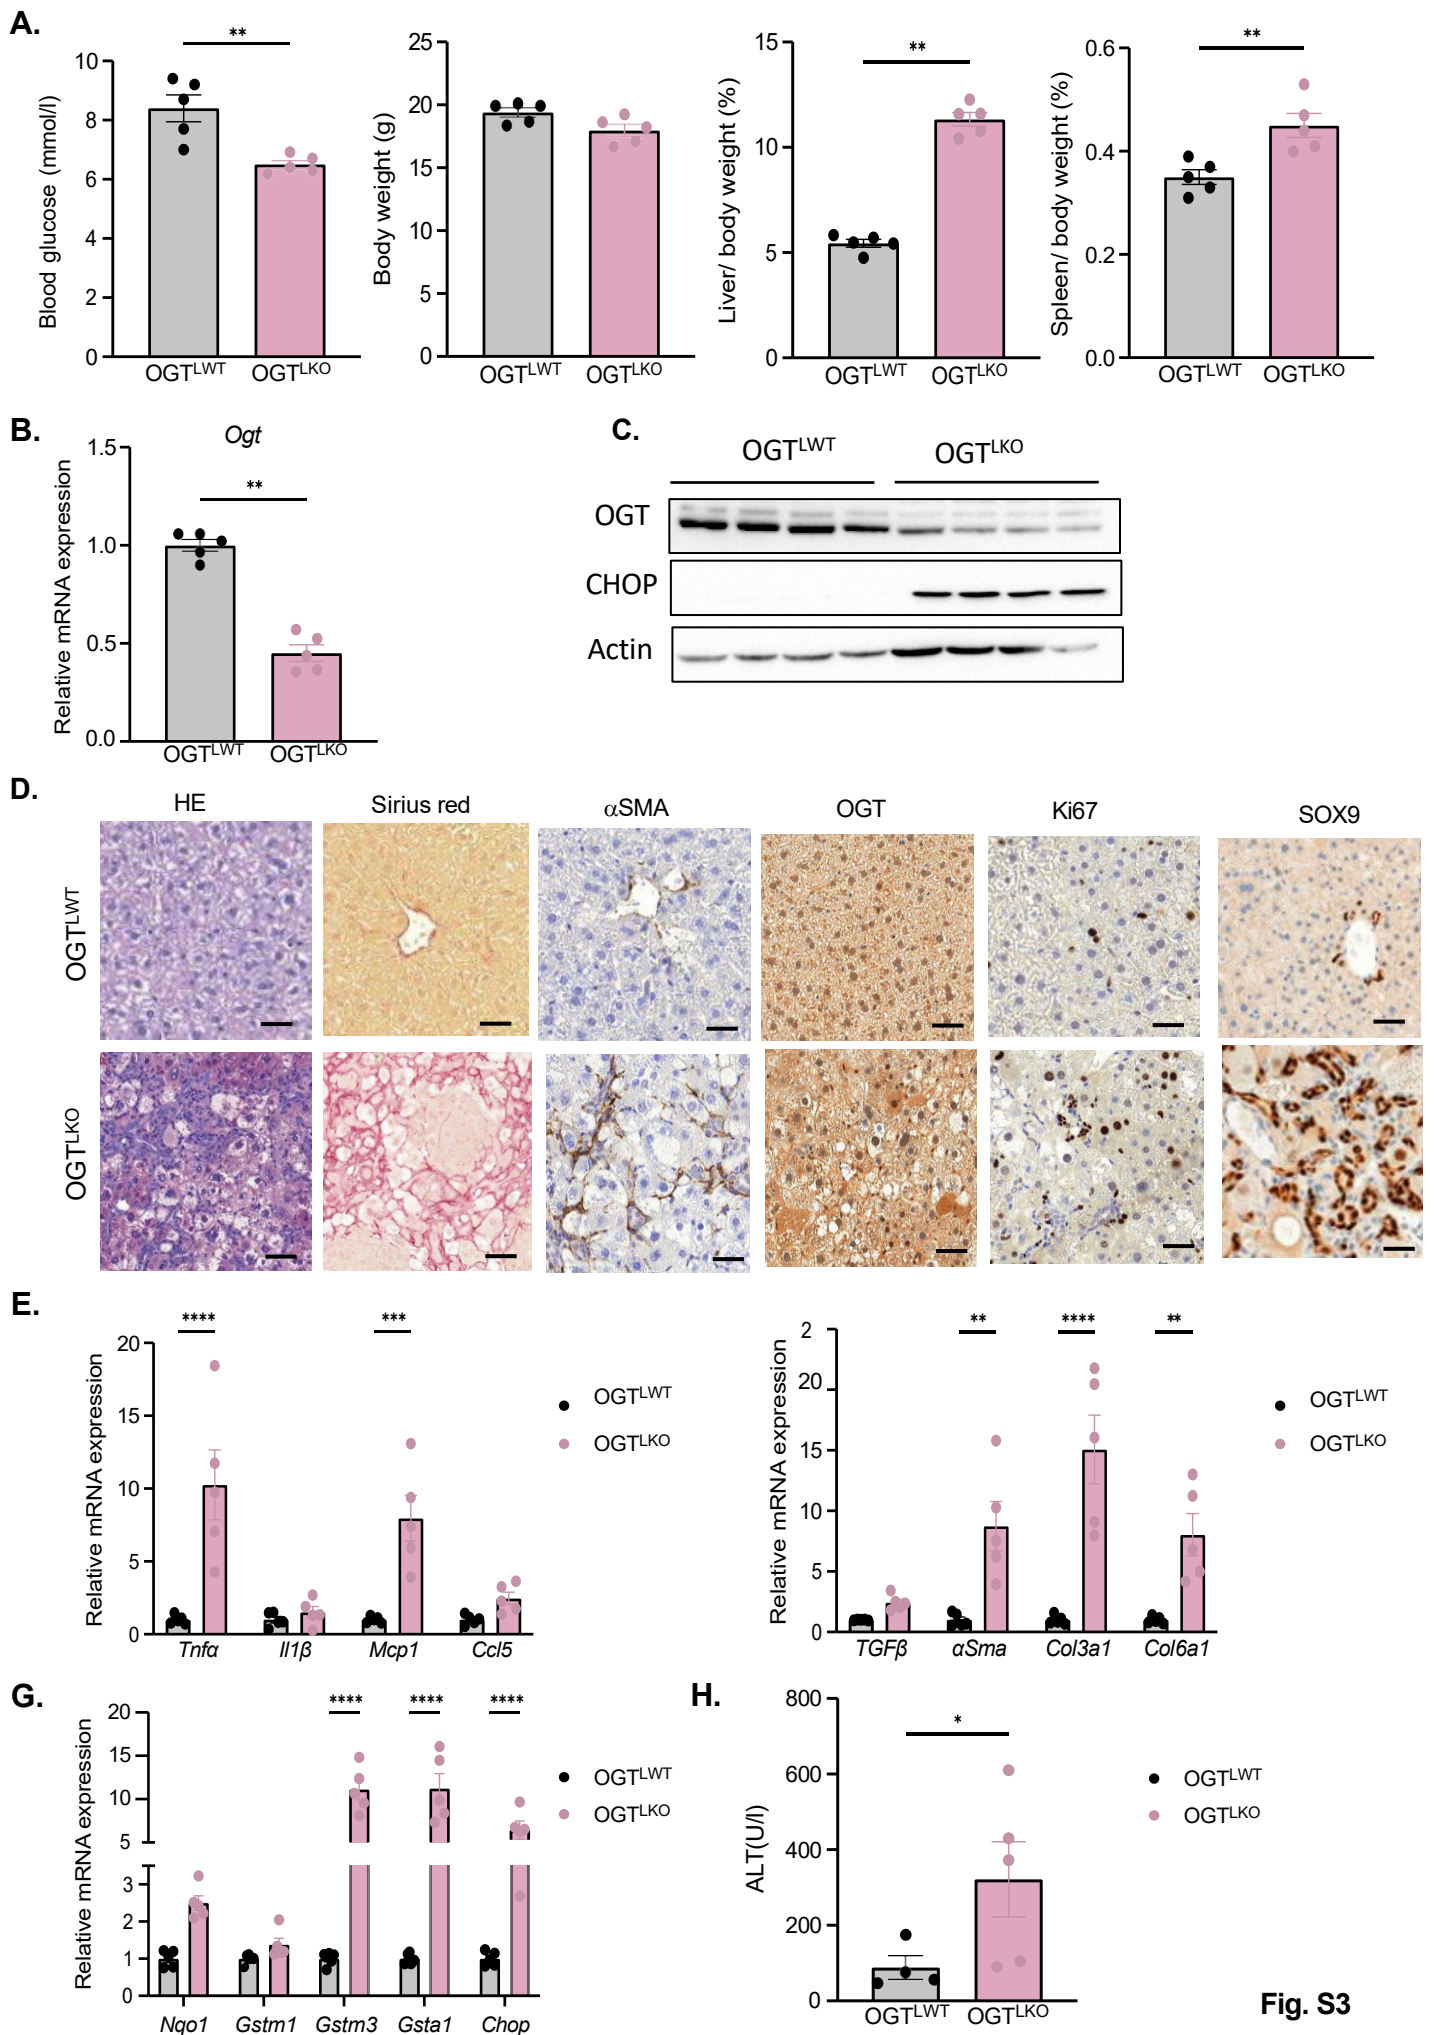

Fig. S3

### A. Oxidative stress

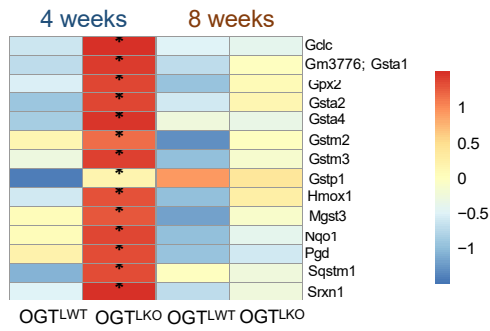

### B. Necroptosis

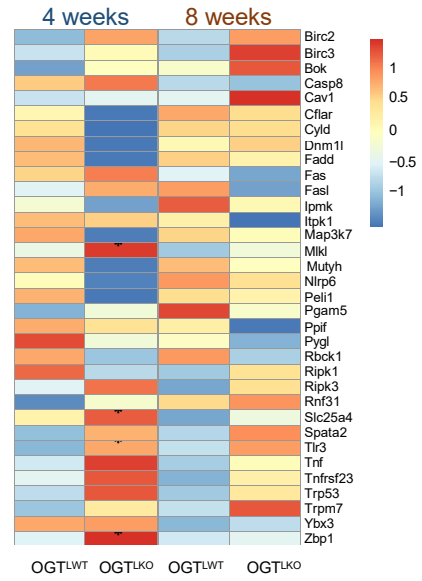

### C. DNA repair

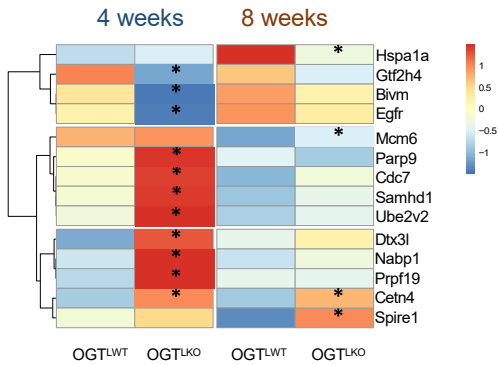

### D. Extracellular matrix

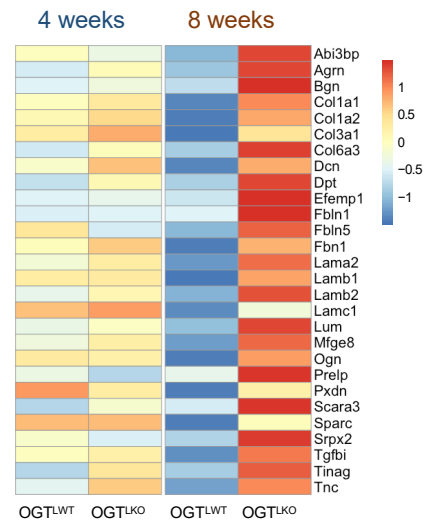

**A.**

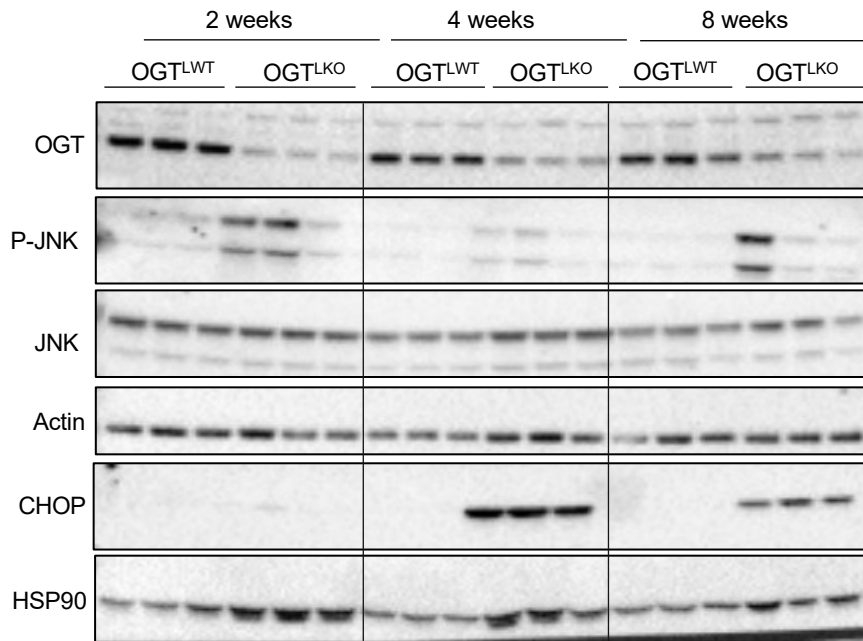

**B.**

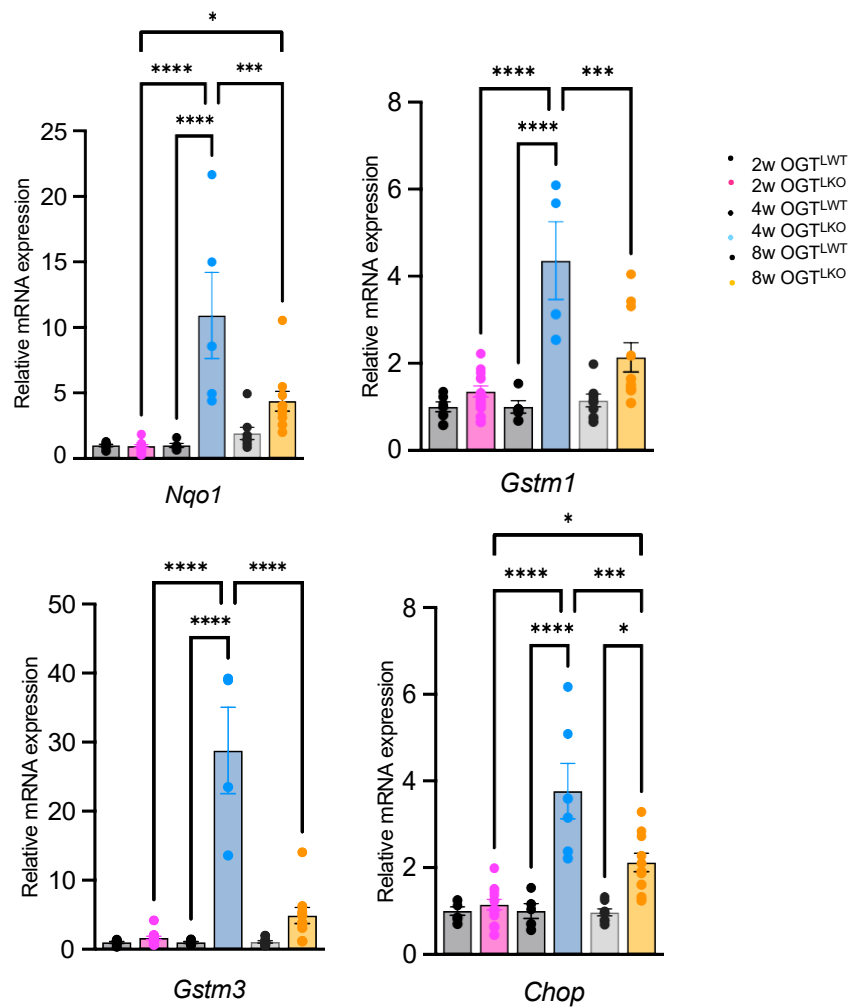

**Fig. S5**

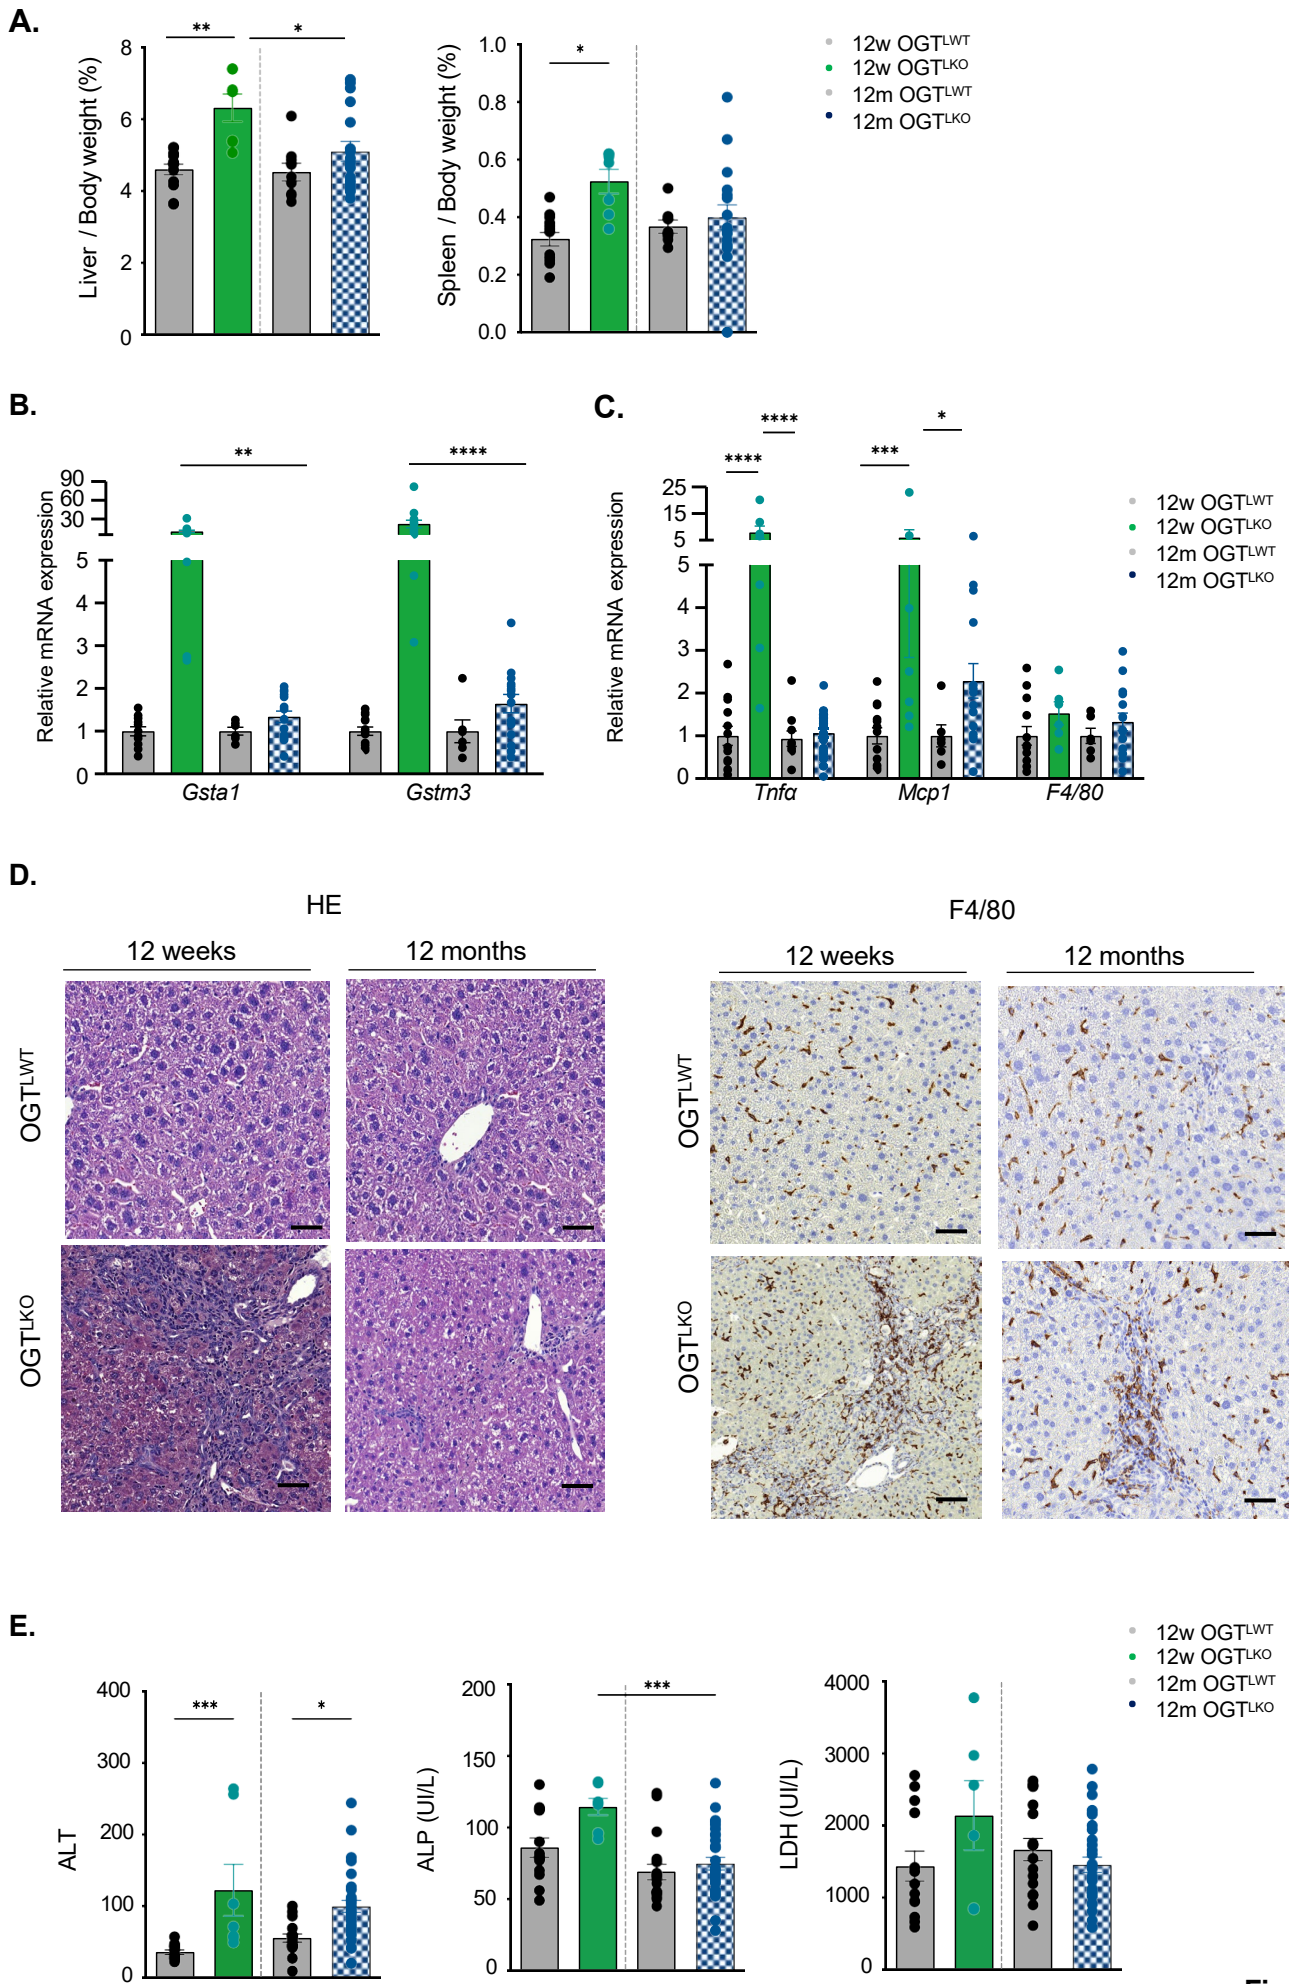

Fig. S6

A.

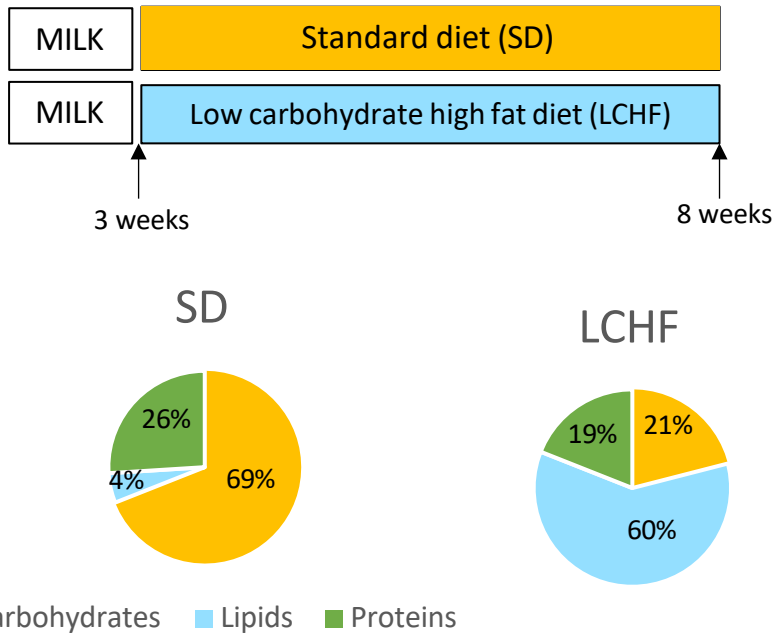

B.

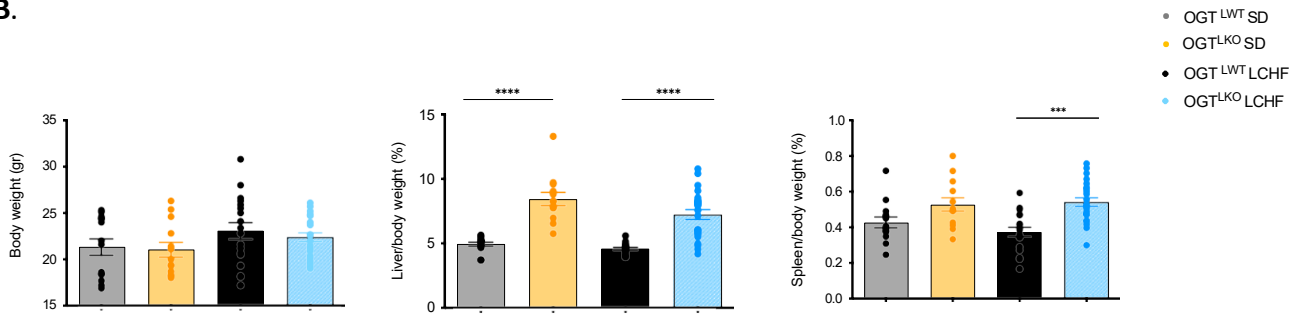

C.

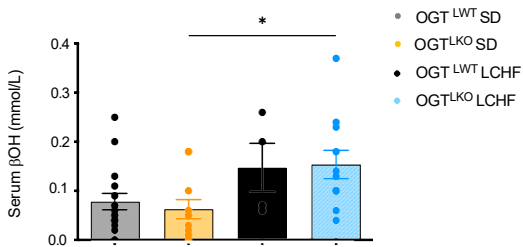

D.

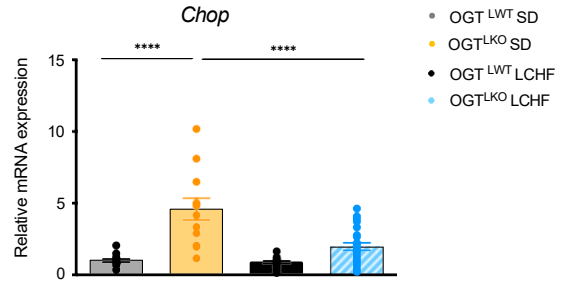

E.

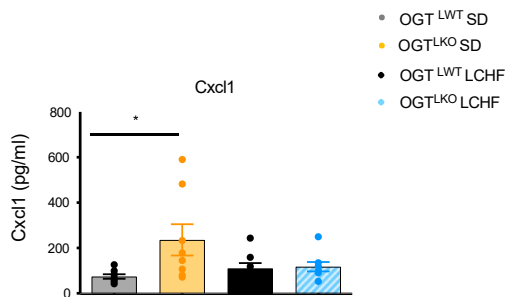

Fig. S7

A.

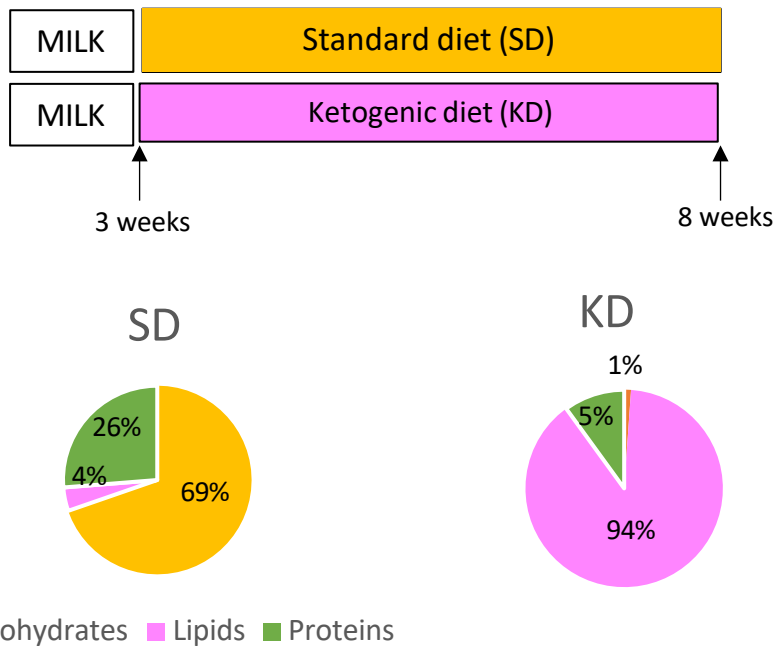

B.

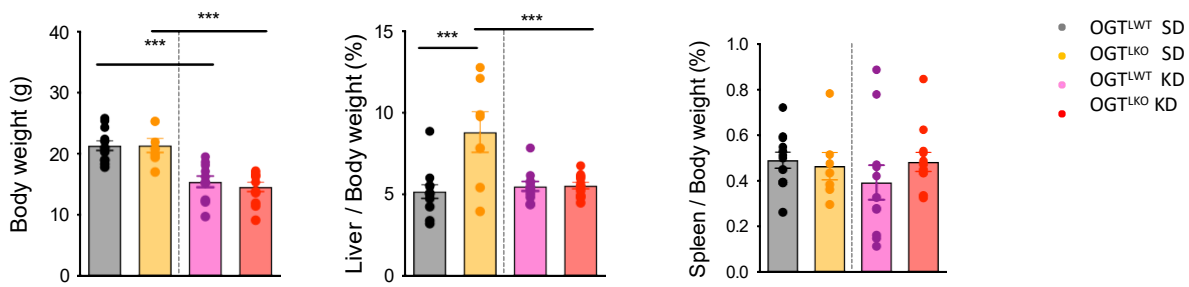

C.

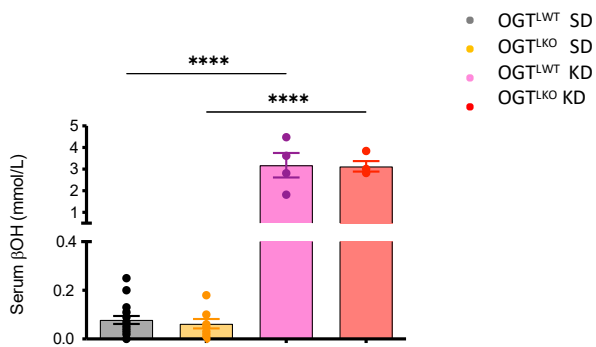

D.

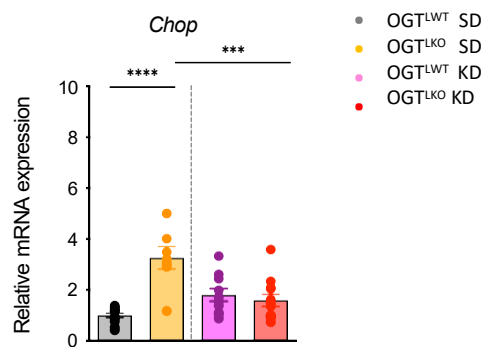



A.

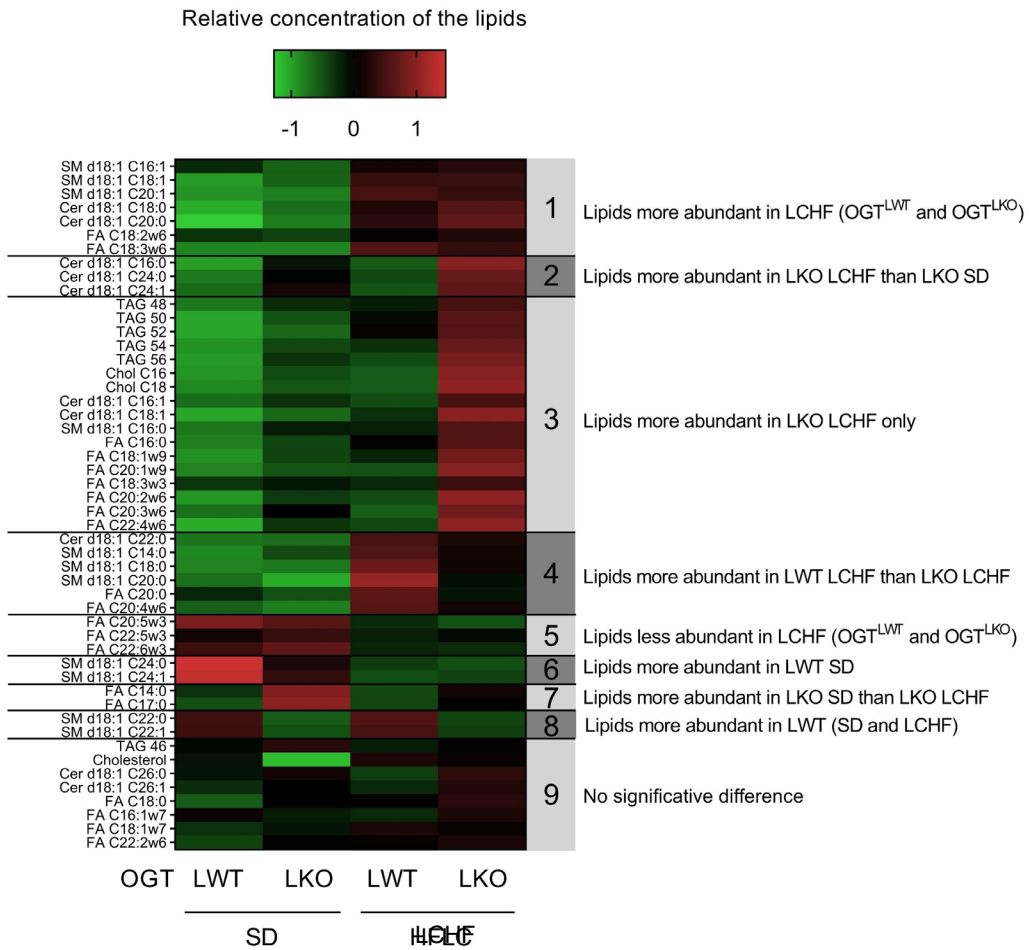

B.

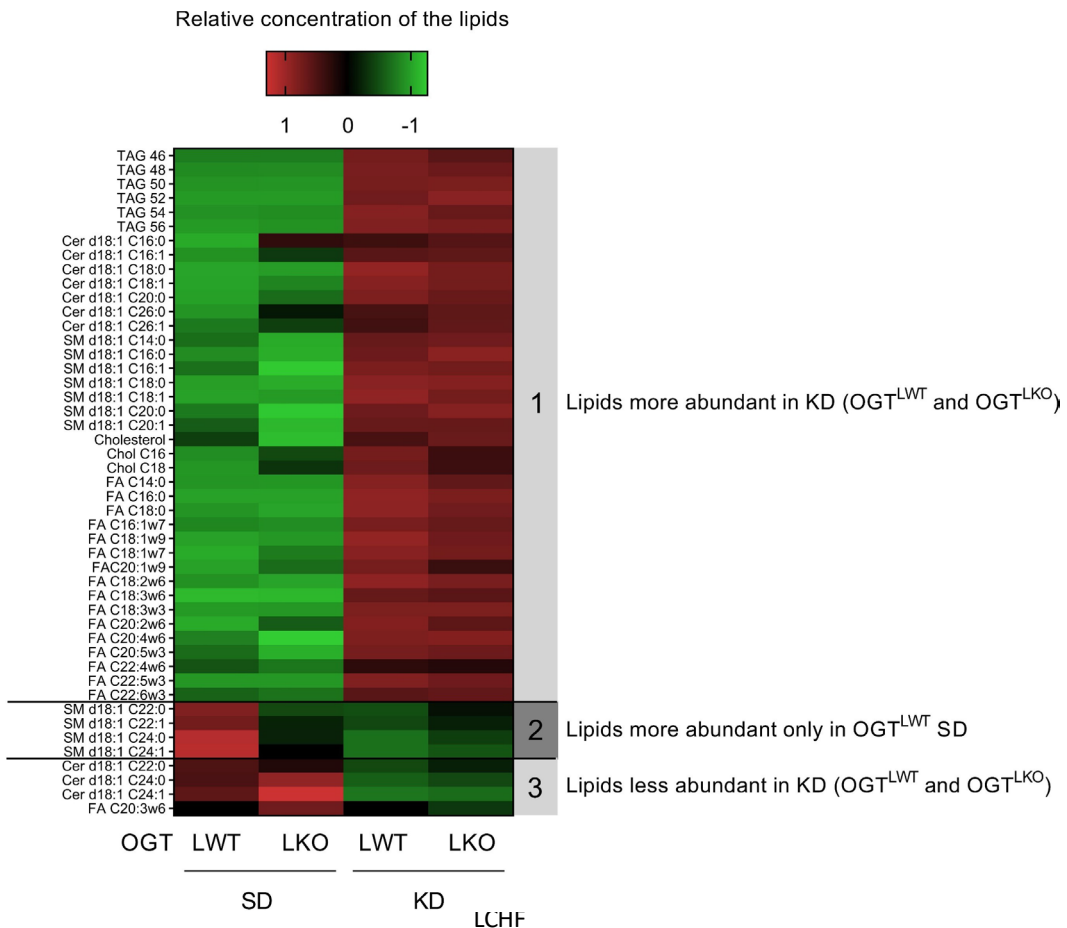

Fig. S9

## Supplementary tables

**Table S1. DE genes at 4 weeks.**

|               |                |                   |                   |
|---------------|----------------|-------------------|-------------------|
| 0610010F05Rik | C6             | Dhx38             | Gcdh              |
| 0610011F06Rik | Calml4         | Dhx58             | Gclc              |
| 1110012L19Rik | Car5a          | Dixdc1            | Gcsh              |
| 1700001C19Rik | Car5b          | Dlg3              | Gde1              |
| 1700024P16Rik | Cbr1           | Dnaic1            | Gdpd1             |
| 1810011O10Rik | Cbr3           | Dnajc2            | Gipc2             |
| 2010003K11Rik | Ccbl1          | Dnajc4            | Gm10639           |
| 9130409I23Rik | Ccdc120        | Dnpep             | Gm10768; Abcc2    |
| A1bg          | Ccl19          | Dnttip2           | Gm11437           |
| Abca3         | Ccl2           | Dpm3              | Gm13139; Znf41-ps |
| Abcb8         | Ccrl2          | Dpyd              | Gm13248           |
| Abhd14b       | Cd200r1        | Dtx3l             | Gm13251           |
| Abhd15        | Cd5l           | Dusp10            | Gm18853           |
| Abhd6         | Cdc7           | Dynll1            | Gm1966            |
| Acad12        | Cdk11b         | Ear12; Ear2; Ear3 | Gm2a              |
| Acot1         | Cdkl5          | Echdc1            | Gm3776; Gsta1     |
| Acot3         | Cenpp          | Eda2r             | Gm4794            |
| Acot4         | Ces1d          | Eif2ak2           | Gm4952            |
| Acsl1         | Ces1e          | Eif2d             | Gm4955            |
| Acss2         | Ces1f          | Eif6              | Gm7120            |
| Adar          | Ces3b          | Elovl3            | Gm8074            |
| Adgrf1        | Cidec          | Elp4              | Gpi1              |
| Adra1b        | Cisd1          | Emc10             | Gpr155            |
| Afm           | Cldn12         | Enox2             | Gpr35             |
| Afp           | Clec2d         | Enpep             | Gpt               |
| Agpat5        | Clpb           | Entpd5            | Gpx2              |
| AI464131      | Cmb1           | Epas1             | Grb7              |
| Aida          | Cmpk2          | Epb41l4b          | Grem2             |
| Akr1c12       | Cmtm6          | Ephx1             | Gsta2             |
| Akr1c13       | Cnm2           | Epsti1            | Gsta4             |
| Akr1c19       | Cnpy2          | Etfhdh            | Gstk1             |
| Aldh6a1       | Coa3           | F11               | Gsto1             |
| Aph1c         | Cops7b         | Fabp5             | Gstp1             |
| Apol9a        | Cox19          | Fam131c           | Gstp2             |
| Apol9b        | Crip2          | Fam20a            | Gstt1             |
| Apom          | Cryz           | Fam210b           | Gstt3             |
| Apon          | Cxcl10         | Fam60a            | Gtf2h4            |
| Arhgap6       | Cxcl9          | Fam98a            | Gtf2ird2          |
| Arrdc4        | Cyp2a22        | Fastkd2           | Guf1              |
| Aspdh         | Cyp2a5; Cyp2a4 | Fbxo36            | Gvin1             |
| Aspg          | Cyp2c40        | Fbxo4             | Gzmd; Gzme        |
| Asrgl1        | Cyp2c69        | Fcgrt             | H2-Ke6            |



|          |            |             |               |
|----------|------------|-------------|---------------|
| Atat1    | Cyp2d37-ps | Fetub       | H2-L; H2-D1   |
| Atf3     | Cyp2f2     | Fgf21       | H2-Q1         |
| Atp2b2   | Cyp2j5     | Fgfr4       | H2-Q4         |
| Atp5e    | Cyp2u1     | Fhit        | H2-Q5         |
| Atp6v1d  | Cyp4a31    | Foxo1       | H2-Q7; H2-Q9  |
| B4galnt1 | Cyp4a32    | Foxp1       | H2-Q8; H2-Q6  |
| Bax      | Cyp4f15    | Ftsj3       | H2-T10        |
| BC021614 | Cyp4f17    | Fzd8        | H2-T22; H2-T9 |
| BC089597 | Dapk1      | Gabrb3      | Hacl1         |
| Bcl2a1a  | Dbt        | Galnt10     | Hao2          |
| Bcl2a1d  | Dcxr       | Galnt4      | Hcfc1r1       |
| Bivm     | Ddit3      | Gamt        | Heatr1        |
| Bmp1     | Ddx58      | Gbp10; Gbp6 | Herc6         |
| Bmp8b    | Ddx60      | Gbp11       | Hes6          |
| Bnip3    | Decr2      | Gbp2b; Gbp5 | Hgfac         |
| Borcs8   | Defb1      | Gbp3        | Hint2         |
| Bphl     | Dhx33      | Gbp4        | Hmox1         |
| Brix1    | Dhx37      | Gbp9        | Hn1           |

|                        |                 |         |          |                        |
|------------------------|-----------------|---------|----------|------------------------|
| Hpn                    | Mb21d1          | Pak1ip1 | Rars     | Sp4                    |
| Hps4                   | Mccc2           | Pank1   | Rbbp9    | Spats2                 |
| Hs3st3b1               | Mest            | Papss2  | Rdh11    | Sqle                   |
| Hsbp1l1                | Mgam            | Paqr9   | Rdh16    | Sqstm1                 |
| Hsd11b1                | Mgea5           | Parp12  | Reep6    | Srd5a2                 |
| Hsd17b7                | Mgll            | Parp14  | Rfc2     | Srxn1                  |
| Hsd3b1                 | Mitd1           | Parp9   | Rgs1     | Sstr2                  |
| Hspb1                  | Mlkl            | Pbld1   | Rhoc     | St6galnac6; St6galnac4 |
| Hspbap1                | Mlxpl           | Pcca    | Rhod     | Stab2                  |
| Htra2                  | Mmab            | Pccb    | Rnf213   | Stard4                 |
| Hykk                   | Mmachc          | Pcid2   | Rnf34    | Stat2                  |
| Ifi35                  | Mmp13           | Pde9a   | Rock2    | Steap2                 |
| Ifi44                  | Mndal           | Pdk1    | Rpn2     | Stx2                   |
| Ifih1                  | Mpst            | Pdxk    | Rsad2    | Sult2a8                |
| Ifit1                  | Mpv17l2         | Pecr    | Rtp4     | Sult3a1                |
| Ifit1bl1               | Mrpl24          | Peg10   | Saa3     | Suox                   |
| Ifit2                  | Mrpl34          | Pex7    | Samhd1   | Tcp11l2                |
| Ifit3                  | Ms4a4b          | Pfdn2   | Scap     | Tesk2                  |
| Ifit3b                 | Ms4a6b          | Pgd     | Scnn1a   | Tfdp2                  |
| Igfals                 | Msmo1           | Phf11a  | Sec11c   | Thoc6                  |
| Il22ra1                | Mterf3          | Phf11b  | Sell     | Thtpa; Zfhx2os         |
| Il2rg                  | Mup-ps19; Mup20 | Phkg2   | Selo     | Timm21                 |
| Impact                 | Mup20           | Phyhd1  | Sema4g   | Tlcd2                  |
| Inmt                   | Mut             | Pik3c2g | Serf1    | Tlr1                   |
| Irak1; Mir718; Mir5132 | Mx1             | Pkd2l2  | Serpine2 | Tlr2                   |
| Irf7                   | Mx2             | Pklr    | Serpinf1 | Tlr3                   |
| Irs2                   | Myc             | Plek    | Serpinf2 | Tm2d2                  |
| Isg15                  | Myo5c           | Pm20d1  | Sesn3    | Tmem184c               |
| Isoc2a                 | Myo6            | Pmvk    | Sfxn1    | Tmem256                |
| Itih1                  | N4bp2           | Pnpo    | Sfxn5    | Tmem43                 |
| Ivd                    | Nabp1           | Polr3g  | Sgsm1    | Tmem53                 |
| Kdelc1                 | Naglu           | Ppfibp2 | Shb      | Tmem97                 |
| Kif3a                  | Nampt           | Ppm1k   | Shmt1    | Tmprss2                |
| Kitl                   | Ncald; Gm15941  | Prkra   | Slc10a5  | Tnfrsf12a              |
| Klf12                  | Ndufa3          | Prlr    | Slc11a1  | Tnfsf10                |
| Klf9                   | Ndufaf3         | Prodh2  | Slc15a3  | Tor1b                  |
| Klk1b4                 | Ndufv3          | Prpf19  | Slc16a10 | Tor3a                  |
| Klkb1; Cyp4v3          | Neto2           | Prpsap1 | Slc16a12 | Tox                    |
| Kptn                   | Nit2            | Prr14   | Slc16a2  | Tprkb                  |
| Krt18                  | Nop56; Snord57  | Prss8   | Slc20a1  | Trim30a                |
| Krt20                  | Nqo1            | Prune   | Slc22a28 | Trim34b; Trim34a       |
| Krt8                   | Nr1i3           | Psemb8  | Slc22a30 | Trmt10a                |

|          |         |           |               |         |
|----------|---------|-----------|---------------|---------|
| Lage3    | Nr5a2   | Psm5      | Slc25a23      | Tsc22d3 |
| Lgals3bp | Nrg1    | Psm8      | Slc25a42      | Tsku    |
| Lilr4b   | Nt5dc1  | Ptcd3     | Slc25a51      | Ttc36   |
| Lin7a    | Nt5e    | Pter      | Slc29a1       | Ttc38   |
| Lmf1     | Nudt19  | Ptgr1     | Slc35b4       | Ttll7   |
| Lonp1    | Nudt2   | Ptprc     | Slc35c2       | Uap1l1  |
| Lrp11    | Nup133  | Pvr       | Slc35d1       | Ube2v2  |
| Lrrc3    | Nup62cl | Pwp2      | Slc35e3       | Ugdh    |
| Lrsam1   | Nxt2    | Pxmp2     | Slc44a1       | Ugp2    |
| Lsg1     | Oaf     | Pxmp4     | Slc47a1       | Ugt2a3  |
| Ly6a     | Oas1a   | Pydc3     | Slc4a7        | Ugt3a1  |
| Ly6c1    | Oas1g   | Pydc4     | Slc6a12       | Ugt3a2  |
| Ly6c2    | Oasl2   | Pygo1     | Slfn5         | Ulk2    |
| Lyar     | Odf3b   | Pyhin1    | Slfn8         | Uqcr10  |
| Mafb     | Ogfrl1  | Qdpr      | Slpi; Mir7678 | Urm1    |
| Man2b2   | Ogt     | Qsox1     | Snrpa1        | Uroc1   |
| Map2k6   | Orm1    | Rab11fip2 | Sox6          | Usp18   |
| Marchf2  | Pafah2  | Rabac1    | Sp100         | Vps28   |

Vps51; Tm7sf2

Vwa8

Wfdc2

Wfdc21

Wfdc3

Xaf1

Xdh

Yeats4

Yif1a

Zbp1

Zcchc24

Zcwpw1

Zfand4

Zfp65

Zfp729a

Zfp729b

Zpr1

**Table S2. DE genes at 8 weeks.**

|                 |                |             |                |                  |         |
|-----------------|----------------|-------------|----------------|------------------|---------|
| 1600002H07Rik   | Atp8a1         | Clstn1      | Epha3          | Gpm6a            | Klf6    |
| 1700011H14Rik   | Axl            | Cmtm3       | Epha7          | Gpm6b            | Klhl13  |
| 1700047117Rik2  | B4galt6        | Cmtm3       | Ephx4          | Gpr65            | Krt19   |
| 2210013O21Rik   | Bambi          | Col1a1      | Erich5         | Gpx3             | Krt7    |
| 2610305D13Rik   | Bcam           | Col1a2      | Etl4           | Gsn              | Lama2   |
| 6720489N17Rik   | Bcl2           | Col3a1      | Ets2           | Gstm2            | Lamb1   |
| Aadat           | Bgn            | Col6a3      | Ezr            | Gucy1a3; Mir7010 | Lamb2   |
| Abcd2           | Bicc1          | Cox18       | Fam105a        | H2-Ab1           | Lamc1   |
| Abhd2           | C1qb           | Cptp        | Fam107a        | H2-DMb1          | Lbh     |
| Abi2            | C1qc           | Creb3l1     | Fam177a        | H2-M2            | Ldb1    |
| Abi3bp          | C1qtnf7        | Crtap       | Fam180a        | Heph             | Ldhd    |
| Abr             | C3ar1          | Csf1r       | Fam19a2        | Hexa             | Lgi2    |
| Ace             | Cacnb3         | Csrp1       | Fam205a2       | Hexb             | Lgmn    |
| Acot9           | Cadm4          | Ctgf        | Fam47e         | Hgf              | Lhfp    |
| Acsf2           | Capn8          | Ctsk        | Fbln1          | Hist1h2ak        | Loxl1   |
| Actg1; Mir6935  | Car2           | Cttnbp2nl   | Fbln5          | Hnf4g            | Loxl2   |
| Adamts1         | Casc4          | Cxcr4       | Fbn1           | Hnrnpa1          | Lpar1   |
| Adamts2         | Casp12         | Cygb        | Fcgr3          | Hpgds            | Lpl     |
| Adamts5         | Cav2           | Cyp7b1      | Fcna           | Hsd3b4           | Lrrcc1  |
| Adamts9         | Cbx6           | Cyp8b1      | Fermt1         | Hsd3b4           | Ltbp4   |
| Adamtsl2        | Ccdc3          | Cysltr1     | Fgfr3          | Htra1            | Lum     |
| Add1; Mir7036b  | Ccdc80         | D17H6S56E-5 | Fgl2           | Icosl            | Ly86    |
| Adgre5; Mir1668 | Ccdc88a        | Dab2        | Fhl2           | ldh2             | Lyz2    |
| Adgrg1          | Ccnd1          | Dcdc2a      | Flrt2          | Ifi27l2a         | Macc1   |
| Adgrg6          | Cd14           | Dcn         | Fmo2           | Ifi27l2b         | Mamdc2  |
| Adh6-ps1        | Cd163          | Ddah2       | Foxq1          | Ifi30            | Maml1d1 |
| Aebp1           | Cd24a          | Ddit4l      | Frzb           | Ifngr1           | Map3k1  |
| Agpat4          | Cd300lh        | Ddr2        | Fut10          | ift57            | Map4k4  |
| Agrn            | Cd300lh        | Ddx26b      | Fxyd5; Mir7050 | Igf1r            | Marcks  |
| Ahnak; Mir6367  | Cd34           | Dkk3        | Fzd1           | Igfbp3           | Mark1   |
| AI506816        | Cd36           | Dnal1       | G2e3           | Igfbp7           | Mbnl3   |
| Aldh1a2         | Cd52           | Dock10      | G6pdx          | Ikkip            | Mboat1  |
| Angpt1          | Cd68           | Dpt         | Gabra3         | Il10rb           | Mcm6    |
| Ankrd1          | Cd74; Mir5107  | Dpy19l3     | Gabrp          | Islr             | Meis2   |
| Ano1            | Cdh6           | Dpysl2      | Galnt3         | Itga3            | Mfge8   |
| Ano6            | Cdk14          | Efemp1      | Gas6           | Itga8            | Mgat4a  |
| Antxr1          | Cerk           | Efhd2       | Gdf10          | Itga9            | Mid1    |
| Anxa13          | Chchd7         | Efnb2       | Gem            | Itgb5            | Mir3962 |
| Anxa2           | Chst15         | Egflam      | Gfpt2          | Itgb6            | Mir6950 |
| Anxa3           | Cib3           | Ehd2        | Gja1           | Itgb8            | Mir7025 |
| Aoah            | Clca3a1; Clca1 | Ehf         | Gldn           | Itgbl1           | Mir7677 |
| Apobec3         | Clca3a2; Clca2 | Elf4        | Gm10052        | Itm2c            | Mmp14   |

|                 |        |       |         |          |        |
|-----------------|--------|-------|---------|----------|--------|
| App             | Cldn4  | Emb   | Gm10600 | Itpr3    | Mmp2   |
| Arg2            | Cldn7  | Emp1  | Gm11710 | Itpripl2 | Moxd1  |
| Arhgdib         | Cldn8  | Emp2  | Gm11711 | Jag1     | Mrc2   |
| Arhgef6         | Clec4n | Emp3  | Gm11711 | Jchain   | Ms4a4a |
| Arpc1b          | Clic1  | Eng   | Gm609   | Kalrn    | Ms4a4d |
| Art4            | Clic6  | Enho  | Gng2    | Kcnma1   | Muc1   |
| Atp2b4; Mir6903 | Clmp   | Enkur | Golm1   | Kifc3    | Mxra8  |
| Atp6v0d2        | Cln6   | Epcam | Gpc3    | Klf5     | Myadm  |

|          |          |               |               |
|----------|----------|---------------|---------------|
| Mybl1    | Pcdhgc3  | Rbl1          | Tmem229b      |
| Myh9     | Pcdhgc4  | Rbm3          | Tmem45a       |
| Myo1d    | Pcdhgc5  | Rbms1         | Tmem47        |
| Myo7a    | Pde1a    | Rbms3         | Tmsb10        |
| Nav1     | Pdgfc    | Rbp1          | Tmsb4x        |
| Ncam1    | Pdgfd    | Rcn1          | Tnc           |
| Ncoa7    | Pdgfra   | Rgs2          | Tnfrsf19      |
| Ndr1     | Pdgfrb   | Rhob          | Tns1          |
| Nedd9    | Pdzk1ip1 | Rhoj          | Tns3          |
| Nek5     | Pea15a   | Rnasel        | Tox3          |
| Ngfrap1  | Pear1    | Robo1         | Tpm4          |
| Nipal1   | Phactr2  | Robo2         | Tpr           |
| Nipal2   | Phlda1   | Rragd         | Trib1         |
| Nmnat1   | Phldb2   | Rtn4          | Trove2        |
| Nox4     | Pirb     | S100a11       | Tspan3        |
| Npcd     | Pisd-ps3 | Scara3        | Tspan8        |
| Npr2     | Pkd2     | Scarf2        | Ttc3          |
| Nptxr    | Pkhd1    | Scpdpd        | Tuba1a        |
| Nt5c3b   | Plat     | Scd2; Mir5114 | Ucp2          |
| Nudt7    | Pld4     | Sdr9c7        | Ugt2b38       |
| Obp2a    | Plekha2  | Selenbp2      | Unc5b         |
| Ogn      | Plekho1  | Selm          | Veph1         |
| Olfml3   | Plet1    | Selplg        | Vgll3         |
| Osmr     | Plk2     | Sema3c        | Vim           |
| Pacs1    | Plod2    | Sema3f        | Wbp5          |
| Pam      | Plp2     | Sema5a        | Wfdc15b       |
| Pamr1    | Plxdc2   | Sema6a        | Wls           |
| Parm1    | Plxna4   | Septin11      | Wwc2          |
| Parp8    | Ppic     | Septin8       | Zeb2; Mir5129 |
| Pawr     | Ppp1r9b  | Serpnb6a      |               |
| Pbk      | Prelp    | Serpinh1      |               |
| Pcdhga1  | Prex2    | Sestd1        |               |
| Pcdhga10 | Prkch    | Sftpd         |               |
| Pcdhga11 | Prom1    | Sh2d4a        |               |
| Pcdhga12 | Prr15l   | Sh3kbp1       |               |
| Pcdhga2  | Prrg1    | Tgfb2         |               |
| Pcdhga3  | Ptger4   | Tgfb3         |               |
| Pcdhga4  | Ptgfrn   | Tgfb1         |               |
| Pcdhga5  | Ptpn13   | Thbs1         |               |
| Pcdhga6  | Ptpn14   | Thbs2         |               |
| Pcdhga7  | Ptprm    | Tiam2         |               |
| Pcdhga8  | Ptprs    | Timp2         |               |

|         |         |          |
|---------|---------|----------|
| Pcdhga9 | Pxdn    | Timp3    |
| Pcdhgb1 | Rab27b  | Tinag    |
| Pcdhgb2 | Rab31   | Tlr4     |
| Pcdhgb4 | Rab8b   | Tlr7     |
| Pcdhgb5 | Ralgds  | Tm4sf1   |
| Pcdhgb6 | Rarres1 | Tmem106a |
| Pcdhgb7 | Rasef   | Tmem173  |
| Pcdhgb8 | Rassf9  | Tmem189  |



**Table S3. DE genes common to 4 and 8 weeks.**

|                                |                |
|--------------------------------|----------------|
| 9230110C19Rik                  | lfi204         |
| 9930111J21Rik1; 9930111J21Rik2 | lfi27          |
| 9930111J21Rik2                 | lqgap1         |
| Abcb1a                         | Laptm5         |
| Adora1                         | Lenep; Flad1   |
| Aebp2                          | Lifr           |
| AI607873                       | Lilrb4a        |
| Ajuba                          | Ly6e           |
| Alcam                          | Mgst3          |
| Anxa5                          | Mmp12          |
| Bcl2a1b; Bcl2a1a               | Mnda           |
| Capsl                          | Mpv17l         |
| Ccl22                          | Ms4a4c         |
| Ccr2                           | Ms4a6c         |
| Cd180                          | Ms4a6d         |
| Cd44                           | Ms4a7          |
| Cd53                           | Myl12a         |
| Cd63                           | Myof           |
| Cd9                            | Nid1           |
| Cetn4                          | Npnt           |
| Chic1                          | Ntrk2          |
| Clec12a                        | P2ry4          |
| Clec7a                         | Pafah1b3       |
| Csprs                          | Phf11d; Phf11c |
| Ctss                           | Pla2g7         |
| Cxcl16                         | Plac8          |
| Cybb                           | Plekhb1        |
| Elovl7                         | Pygb           |
| Epb41l4a                       | Retsat         |
| Evi2a; Evi2b; Gm21975          | Samd9l         |
| F2rl1                          | Septin6        |
| Fads3                          | Sirpa          |
| Fgf1                           | Slamf7         |
| Flna                           | Slamf9         |
| Fn3krp                         | Slc22a26       |
| Glipr1                         | Slc25a45       |
| Gm13212                        | Slfn2          |
| Gm2399                         | Spi1           |
| Gm3934                         | Tceal8         |
| Gm5431                         | Tcf24          |
| Gm9844                         | Tlr13          |
| Gpnmb                          | Tmem176b       |

Gstm3  
H2-Aa  
H2-DMb2  
H2-Eb1  
Haus8  
Hcls1  
Ido2  
Ifi203

Tmem19  
Tnfaip3  
Vcam1

**Table S4. Primer sequences.**

| <b>Name</b>                      | <b>Sequence</b>                 |
|----------------------------------|---------------------------------|
| <b>Ccl5 F</b>                    | CTG ACC CTG TAT AGC TTC CCT     |
| <b>Ccl5 R</b>                    | GGG ATT ACT GAG TGG CAT CC      |
| <b>Chop F</b>                    | AAG GAG AAG GAG CAG GAG AAC     |
| <b>Chop R</b>                    | GGT ACA CTT CCG GAG AGA CAG     |
| <b>Col3a1 F</b>                  | CTGTAACATGGAAACTGGGGAAA         |
| <b>Col3a1 R</b>                  | CCATAGCTGAACTGAAAACCACC         |
| <b>Col6a1 F</b>                  | CTGCTGCTACAAGCCTGCT             |
| <b>Col6a1 R</b>                  | CCCCATAAGGTTTCAGCCTCA           |
| <b>CycA2 F</b>                   | TGC CTT CAC TCA TTG CTG GA      |
| <b>CycA2 R</b>                   | TGT GGC GCT TTG AGG TAG GT      |
| <b>CycB1 F</b>                   | TGC CTT TGT CAC GGC CTT AG      |
| <b>CycB1 R</b>                   | GGA AAT TCT TGA CAA CGG TG      |
| <b>CycD F</b>                    | GCG TAC CCT GAC ACC AAT CTC     |
| <b>CycD R</b>                    | CTC CTC TTC GCA CTT CTG CTC     |
| <b>CycE F</b>                    | CAGAGCAGCGAGCAGGAGA             |
| <b>CycE R</b>                    | CAGCTGCTTCCACACCACTG            |
| <b>F4/80 F</b>                   | CTT TGG CTA TGG GCT TCC AGT C   |
| <b>F4/80 R</b>                   | GCA AGG AGG ACA GAG TTT ATC GTG |
| <b>Gpx3 F</b>                    | GCC ATT TGG CTT GGT CAT TC      |
| <b>Gpx3 R</b>                    | TGG GGA GTA TCT CCG AGT TC      |
| <b>Gpx4 F</b>                    | GCA CGA ATT CTC AGC CAA GG      |
| <b>Gpx4 R</b>                    | CAA ACT GGT TGC AGG GGA AG      |
| <b>Gclc F</b>                    | CTG CAC ATC TAC CAC GCA GT      |
| <b>Gclc R</b>                    | TTC ATG ATC GAA GGA CAC CA      |
| <b>Gss F</b>                     | GAAGCAGCTCGAAGAAGCTGG           |
| <b>Gss R</b>                     | AGCACTGGGTACTGGTGAGG            |
| <b>Gsta1 F</b>                   | CCA GAG CCA TTC TCA ACT A       |
| <b>Gsta1 R</b>                   | TGC CCA ATC ATT TCA GTC AG      |
| <b>Gstm1 F</b>                   | CTACCTTGCCCGAAAGCAC             |
| <b>Gstm1 R</b>                   | ATGTCTGCACGGATCCTCTC            |
| <b>Gstm3 R</b>                   | TGA AGG CCA TCC CTG AGA AA      |
| <b>Gstm3 F</b>                   | CTT GGG AGG AAG CGG CTA CT      |
| <b>Gstm5 R</b>                   | AGA TAC ATC GCA CGC AAG CA      |
| <b>Gstm5 F</b>                   | CCA TGT GAA TTT CCC CAG GA      |
| <b>Hnf4<math>\alpha</math> F</b> | TGCCTGCCTCAAAGCCAT              |
| <b>Hnf4<math>\alpha</math> R</b> | CACTCAGCCCCTTGGCAT              |
| <b>HO-1 F</b>                    | GTCAAGCACAGGGTGACAGA            |
| <b>HO-1 R</b>                    | ATCACCTGCAGCTCCTCAAA            |
| <b>Il-1 } F</b>                  | GGGCCTCAAAGGAAAGAATC            |
| <b>Il-1 } R</b>                  | TACCAGTTGGGGAACTCTGC            |

|                                 |                                 |
|---------------------------------|---------------------------------|
| <b>KI67 F</b>                   | AGG ATG GAA GCA AGC CAA CA      |
| <b>KI67 R</b>                   | GGC CCT TGG CAT ACA CAA AA      |
| <b>Krt7 F</b>                   | CACCCGGAATGAGATTGCG             |
| <b>Krt7 R</b>                   | GCACGCTGGTTCTTCAAGGT            |
| <b>Krt19 F</b>                  | TGCTGGATGAGCTGACTCTG            |
| <b>Krt19 R</b>                  | AATCCACCTCCACACTGACC            |
| <b>Mcp1 F</b>                   | TGAATGTGAAGTTGACCCGT            |
| <b>Mcp1 R</b>                   | AGAAGTGCTTGAGGTGGTTG            |
| <b>Nq01 F</b>                   | AGC GTT CGG TAT TAC GAT CC      |
| <b>Nq01 R</b>                   | AGT ACA ATC AGG GCT CTT CTC G   |
| <b>Nrf2 F</b>                   | TTC TTT CAG CAG CAT CCT CTC CAC |
| <b>Nrf2 R</b>                   | ACA GCC TTC AAT AGT CCC GTC CAG |
| <b>Oga F</b>                    | TTCACTGAAGGCTAATGGCTCCCG        |
| <b>Oga R</b>                    | TGTCACAGGCTCCGACCAAGT           |
| <b>Ogt F</b>                    | TCGCACAGCTCTGTCAAAA             |
| <b>Ogt R</b>                    | GCCCTGGGTCGCTTGGAAGA            |
| <b>Phgdh F</b>                  | GGAGGAGATCTGGCCTCTCT            |
| <b>Phgdh R</b>                  | GCACACCTTTCTTGCACTGA            |
| <b><math>\alpha</math>Sma F</b> | TGA CCC AGA TTA TGT TTG AGA CC  |
| <b><math>\alpha</math>Sma R</b> | CCA GAG TCC AGC ACA ATA CCA     |
| <b>Tbp F</b>                    | CCCCACAACCTTTCCATTCT            |
| <b>Tbp R</b>                    | GCAGGAGTGATAGGGGTCAT            |
| <b>Tgf<math>\beta</math> F</b>  | TGAGTGGCTGTCTTTTGACG            |
| <b>Tgf<math>\beta</math> R</b>  | AGTGAGCGCTGAATCGAAAG            |
| <b>Tnf<math>\alpha</math> F</b> | TGGGAGTAGACAAGGTACAACC          |
| <b>Tnf<math>\alpha</math> R</b> | CATCTTCTCAAAATTTCGAGTGAC        |

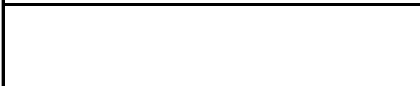

Supplement: mmc1.pdf [file mmc1.pdf]
