# Supplementary material for: O-GlcNAc transferase acts as a critical nutritional node for the control of liver homeostasis
Source: PubMed Central journal article supplement — JHEP Rep. 2023 Aug 12;6(2):100878. doi: 10.1016/j.jhepr.2023.100878 (PMC10827605; doi:10.1016/j.jhepr.2023.100878), 2023-08-12

# O-GlcNAc transferase acts as a critical nutritional node for the control of liver homeostasis

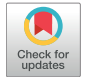

Paula Ortega-Prieto,<sup>1,†</sup> Lucia Parlati,<sup>1,†</sup> Fadila Benhamed,<sup>1</sup> Marion Regnier,<sup>1</sup> Isadora Cavalcante,<sup>2</sup> Mélanie Montabond,<sup>1</sup> Rachel Onifarasoiaina,<sup>3</sup> Maryline Favier,<sup>3</sup> Natasa Pavlovic,<sup>4</sup> Julie Magusto,<sup>5</sup> Michèle Cauzac,<sup>1</sup> Patrick Pagesy,<sup>1</sup> Jérémie Gautheron,<sup>5</sup> Chantal Desdouets,<sup>4</sup> Sandra Guilmeau,<sup>1</sup> Tarik Issad,<sup>1,\*</sup> Catherine Postic<sup>1,\*</sup>

<sup>1</sup>Université Paris Cité, Institut Cochin, CNRS, INSERM, Paris, France; <sup>2</sup>Team Genomics and signaling of endocrine tumors, Institut Cochin, CNRS, INSERM, Université Paris Cité, Paris, France; <sup>3</sup>HistIM Platform, Institut Cochin, CNRS, INSERM, Université de Paris Cité, Paris, France; <sup>4</sup>Team Proliferation, Stress and Liver Physiopathology, Centre de Recherche des Cordeliers, INSERM, Sorbonne Université, Université Paris Cité, Paris, France; <sup>5</sup>Centre de Recherche Saint-Antoine, Sorbonne Université, Inserm, Paris, France

JHEP Reports 2024. <https://doi.org/10.1016/j.jhepr.2023.100878>

**Background & Aims:** O-GlcNAcylation is a reversible post-translational modification controlled by the activity of two enzymes, O-GlcNAc transferase (OGT) and O-GlcNAcase (OGA). In the liver, O-GlcNAcylation has emerged as an important regulatory mechanism underlying normal liver physiology and metabolic disease.

**Methods:** To address whether OGT acts as a critical hepatic nutritional node, mice with a constitutive hepatocyte-specific deletion of OGT (OGT<sup>LKO</sup>) were generated and challenged with different carbohydrate- and lipid-containing diets.

**Results:** Analyses of 4-week-old OGT<sup>LKO</sup> mice revealed significant oxidative and endoplasmic reticulum stress, and DNA damage, together with inflammation and fibrosis, in the liver. Susceptibility to oxidative and endoplasmic reticulum stress-induced apoptosis was also elevated in OGT<sup>LKO</sup> hepatocytes. Although OGT expression was partially recovered in the liver of 8-week-old OGT<sup>LKO</sup> mice, hepatic injury and fibrosis were not rescued but rather worsened with time. Interestingly, weaning of OGT<sup>LKO</sup> mice on a ketogenic diet (low carbohydrate, high fat) fully prevented the hepatic alterations induced by OGT deletion, indicating that reduced carbohydrate intake protects an OGT-deficient liver.

**Conclusions:** These findings pinpoint OGT as a key mediator of hepatocyte homeostasis and survival upon carbohydrate intake and validate OGT<sup>LKO</sup> mice as a valuable model for assessing therapeutical approaches of advanced liver fibrosis.

**Impact and Implications:** Our study shows that hepatocyte-specific deletion of O-GlcNAc transferase (OGT) leads to severe liver injury, reinforcing the importance of O-GlcNAcylation and OGT for hepatocyte homeostasis and survival. Our study also validates the *Ogt* liver-deficient mouse as a valuable model for the study of advanced liver fibrosis. Importantly, as the severe hepatic fibrosis of *Ogt* liver-deficient mice could be fully prevented upon feeding on a ketogenic diet (*i.e.* very-low-carbohydrate, high-fat diet) this work underlines the potential interest of nutritional intervention as antifibrogenic strategies. © 2023 Published by Elsevier B.V. on behalf of European Association for the Study of the Liver (EASL). This is an open access article under the CC BY-NC-ND license (<http://creativecommons.org/licenses/by-nc-nd/4.0/>).

## Introduction

O-GlcNAcylation is a dynamic and reversible post-translational modification controlled by the activity of two enzymes, O-GlcNAc transferase (OGT) and O-GlcNAcase (OGA). OGT and OGA mediate the dynamic cycling of O-GlcNAcylation on a wide variety of cytosolic, nuclear, and mitochondrial proteins, in response to environmental changes, such as nutrients or stress challenges.<sup>1</sup> Therefore, O-GlcNAcylation has been proposed as a nutrient and stress sensor that mediates cellular adaptations ranging from transcription and translation to signal transduction

and metabolism. As a result, disruption of O-GlcNAc homeostasis has been implicated in the pathogenesis of several human diseases, including cancer, diabetes, and neurodegeneration.<sup>2</sup>

In the liver, O-GlcNAcylation has emerged as an important regulatory mechanism underlying normal liver physiology and metabolic disease. O-GlcNAcylation significantly contributes to liver gluco-lipototoxicity by modulating key effectors of hepatic metabolism.<sup>3,4</sup> Moreover, OGT acts as a suppressor of hepatocyte necroptosis (a specific form of regulated cell death), and its hepatic deletion triggers liver fibrosis in mice.<sup>5</sup> Altogether, these studies suggested that OGT may act as a critical molecular switch between hepatocyte survival and death in response to chronic liver injury.<sup>5</sup>

Although several cellular functions of O-GlcNAcylation are clearly emerging, we hypothesise that OGT loss of function may prevent liver cells to cope with the oxidative stress induced by dietary glucose.<sup>6–9</sup> Indeed, OGT was shown to protect against oxidative stress by promoting antioxidant responses, whereas

Keywords: OGT; Oxidative stress; Liver fibrosis; Carbohydrate intake; Ketogenic diet. Received 8 November 2022; received in revised form 6 July 2023; accepted 24 July 2023; available online 12 August 2023

<sup>†</sup> These authors contributed equally.

\* Corresponding authors. Address: Institut Cochin, Inserm U101624, Rue du Faubourg Saint Jacques 75014 Paris, France. Tel.: +33 685849052 (C. Postic); +33 1 44412567 (T. Issad).

E-mail addresses: [catherine.postic@inserm.fr](mailto:catherine.postic@inserm.fr) (C. Postic), [tarik.issad@inserm.fr](mailto:tarik.issad@inserm.fr) (T. Issad).

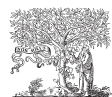

lack of OGT correlates with high oxidative stress in response to elevated glucose concentrations.<sup>10</sup> To test this hypothesis, we first examined at different time points ranging from 2 weeks to 1 year the phenotype of mice with a constitutive OGT deficiency in hepatocytes (OGT<sup>LKO</sup>) and fed a 70% carbohydrate diet. We then explored whether limiting carbohydrate intake at weaning could protect the liver against lack of OGT. Interestingly, analysis of OGT<sup>LKO</sup> mice at 4 weeks revealed the onset of hepatic oxidative and endoplasmic reticulum (ER) stress, and DNA damage, together with liver inflammation and moderate fibrosis. Liver injury and fibrosis worsened with time when OGT<sup>LKO</sup> mice were maintained on a high-carbohydrate diet, as characterised by advanced hepatic fibrosis and septa surrounding regenerative nodules. Interestingly, weaning OGT<sup>LKO</sup> mice on a ketogenic low-carbohydrate, high-fat diet, to limit carbohydrate intake, fully prevented the severe hepatic alterations induced by early OGT deletion, including advanced fibrosis. These findings underline the critical role of OGT in hepatocyte homeostasis and survival upon carbohydrate intake. Our study also establishes the OGT<sup>LKO</sup> mouse model as a spontaneous model of advanced fibrosis that may, in the future, facilitate therapeutic target identification for prevention and treatment of chronic liver disease.

## Materials and methods

### Generation of OGT<sup>LKO</sup> mice

Conditional hepatic-specific OGT knockout mice (OGT<sup>LKO</sup>) and control floxed littermates (OGT<sup>LWT</sup>) were generated by crossing *Albumin-Cre*; *Ogt*<sup>F/Y</sup> with *Ogt*<sup>F/F</sup> mice. The *Ogt* locus was floxed on either side of exons 6–7 encoding amino acids 206 and 232. *Ogt* mice were obtained from Jackson Laboratories (JAX stock #00486).

### Animals and nutritional challenges

All animal procedures were carried out according to the French guidelines for the care and use of experimental animals (animal authorisation agreements #9723, #19226, and #33226 from the University of Paris Ethical Committee, Paris, France). Mice (males and females) were housed in colony housing on a 12-h light/dark cycle. All mice were given free access to water and control chow diet (standard diet [SD] in % of calories: 69% of carbohydrates, 4% of fat, and 26% of proteins; SAFE #A03). Regarding nutritional challenges, OGT<sup>LWT</sup> and OGT<sup>LKO</sup> mice were weaned and fed for 5 weeks with a low-carbohydrate, high-fat (LCHF) diet (in percentage of calories: 21% of carbohydrates, 60% of fat, 19% of proteins) (SSNIF #E15742) or a ketogenic diet (KD in % of calories: 1% of carbohydrates, 94% of fat, 5% of proteins) (SSNIF #E15149). The age and sex of the mice are specified in the results and figure legends.

### Blood glucose concentrations and glucose homeostasis

Blood glucose was measured in total blood using an Accu-Check glucometer (Roche). Glucose tolerance tests, pyruvate tolerance tests, and insulin tolerance tests were performed in 4-week-old OGT<sup>LKO</sup> and control OGT<sup>LWT</sup> littermates. For glucose tolerance tests, mice were fasted 4–5 h and received 2 g/kg of glucose; for pyruvate tolerance tests, mice were fasted overnight and received 1 g/kg of pyruvate; and for insulin tolerance tests, mice were fasted 4–5 h and received 0.75 U/kg of insulin. Blood glucose concentrations were measured over a period of 120 min for all tests.

### β-Hydroxybutyrate concentrations

β-Hydroxybutyrate was measured using Optium β-Ketone test strips that carried Optium Xceed sensors (Abbott Diabetes Care).

### Cytokines and liver enzymes concentrations

Concentrations of serum cytokines were analysed using the V-PLEX Proinflammatory Panel 1 Mouse Kit (Meso Scale, K15048D). Serum alanine aminotransferase (ALT), aspartate aminotransferase (AST), lactate dehydrogenase (LDH), alkaline phosphatase (ALP), and total and direct bilirubin concentrations were determined using an automated Monarch device (Laboratoire de Biochimie, Faculté de Médecine Bichat, Paris, France).

### RNA isolation, reverse transcription, and qPCR

Snap-frozen liver tissue was powdered, and approximately 15 mg of liver powder was used for RNA extraction using the SV Total RNA Isolation System (Promega, Madison, WI, USA; Z3101). mRNAs were reverse transcribed, and cDNA levels were measured by quantitative PCR (qPCR) (LightCycler480 SYBR Green I Master, Roche) using the primers described in Table S4. Gene expression was normalised over expression of the TATA-box binding protein (TBP) mRNA levels.

### Protein extraction, Western blot, and WGA precipitation experiments

Whole tissue was lysed in lysis buffer (20 mM Tris HCl [pH 7.5], 150 mM NaCl, 5 mM EDTA, 50 mM NaF, 30 mM NaP, 1% Triton X-100, EDTA-free protease inhibitor cocktail [Roche, 4693132001], orthovanadate 1 mM, Thiamet-G 10 μM [Sigma, SML0244]). Western blot was performed using 30 μg of lysate. For lectin-based precipitation assay, the lysate (1 mg of proteins) was incubated overnight with 25 μl of wheat germ agglutinin (WGA) agarose beads (Sigma, L1882) at 4 °C. The precipitate was resolved by SDS-PAGE and immunoblotted with specific antibodies. Antibodies used are the following: anti-OGT (Sigma, SAB4200311), anti-O-GlcNAc antibody (RL2, ab2739), anti-glyceraldehyde 3-phosphate dehydrogenase (GAPDH) (Santa Cruz, sc-25778), anti-β-actin (CST #4970), anti-cyclin A2 (CycA2) (Santa Cruz, sc-596), anti-cyclin D1 (CycD1) (CST #2978), anti-proliferating cell nuclear antigen (PCNA) (CST #2586), anti-p62 (Enzo Life Sciences, BML-PW9860-0100), anti-p-p62 (CST #14354), anti-CCAAT-enhancer-binding protein homologous protein (CHOP) (CST #5554), anti-γH2AX (CST #2577), anti-H2AX total (CST #7631), anti-cleaved caspase-3 (CST #9661), anti-mixed lineage kinase domain-like pseudokinase (MLKL) (ab172868), anti-receptor-interacting serine/threonine-protein kinase 3 (RIPK3) (orb74415), anti-forkhead box protein o1 (Foxo1) (CST #2880), anti-c-Jun N-terminal kinase (JNK) (CST #9252), and anti-p-JNK (CST #9255). Semiquantitative analysis was performed using ChemiDoc software (Bio-Rad).

### Histological analyses and tissue staining

Fixed livers (4% paraformaldehyde, 24 h at 4 °C) were embedded in paraffin and sliced at 7 μm. After deparaffinisation and rehydration, slides were stained with H&E, Sirius Red, and alpha-smooth muscle actin (αSMA) for fibrosis detection. In the case of immunolabelling, antigen retrieval was performed in citrate buffer for 10 min at 95 °C and treated with peroxidase blocking reagent (Sigma, H1009). Slides were permeabilised with 0.01% Tween20, and unspecific antigenicity was blocked with 2% bovine serum albumin and 2% serum, from the species in which the secondary antibody was raised. Primary antibodies used are the following: anti-OGT (Abcam, ab96718), anti-Ki67 (Thermo

Fisher, MA5-14520), anti-hepatocyte nuclear factor 4 alpha (HNF4 $\alpha$ ) (Santa Cruz, sc-6556), anti-sex-determining region Y-box 2 (SOX9) (EMD Millipore, ab5535), anti-cytokeratin 19 (Krt19) (Abcam, ab52625), anti-F4/80 (CST#70076), and anti-malondialdehyde (MDA) (Abcam, ab27642). HRP-conjugated secondary antibodies were revealed by incubation with DAB substrate (Dako, K3468), co-stained with haematoxylin (Vector Laboratories, H-3404), and mounted with VectaMount™ mounting medium (Vector Laboratories, H-5000). For apoptosis, the terminal deoxynucleotidyl transferase dUTP nick end labelling (TUNEL) kit (EMD Millipore kit S71000) was used. Analysis of images was processed using QuPath software.

### Polyploidy assessment

To analyse polyploidy, liver sections were stained with Hoechst 33342, after which a dataset with nuclei size and circularity was extracted using QuPath. Then, by using R software (R Foundation for Statistical Computing, Vienna, Austria), a dataset containing only hepatocyte nuclei was generated based on size (>30  $\mu$ m) and circularity (>0.8). Nuclear ploidy was assessed automatically, by a specific macro developed using Image J software, as previously described.<sup>11</sup> Hepatocyte polyploidy is presented as the ratio between the number of polyploid cells and total hepatocytes.

### Liver neutral lipid analysis

Hepatic lipids were extracted from liver samples as previously described elsewhere.<sup>12</sup> Briefly, 50 mg of liver was homogenised in 2:1 (v/v) methanol/ethylene glycol tetraacetic acid (5 mM), and lipids from 2 mg of liver were extracted in a mix of methanol, chloroform, and water (2.5:2.5:2, v/v/v) in the presence of internal standards (glyceryltrinonadecanoate, stigmaterol, and cholesteryl heptadecanoate). Triglycerides, free cholesterol, and cholesterol esters were analysed by gas chromatography on a Focus Thermo Electron system using a Zebron-1 Phenomenex fused-silica capillary column (5 m, 0.32 mm inner diameter, 0.50- $\mu$ m film thickness). The oven temperature was programmed from 200 to 350 °C at a rate of 5 °C/min, and the carrier gas was hydrogen (0.5 bar). The injector and detector were at 315 and 345 °C, respectively.

### Liver fatty acid analysis

Fatty acid methyl esters (FAME) molecular species were extracted from an equivalent of 1 mg liver tissue in the presence of internal standards glyceryl triheptadecanoate (2  $\mu$ g). The lipid extract was transmethylated with 1 ml boron trifluoride in methanol (14% solution; Sigma) and 1 ml heptane for 60 min at 80 °C and evaporated to dryness. The FAMEs were extracted with heptane/water (2:1). The organic phase was evaporated to dryness and dissolved in 50  $\mu$ l ethyl acetate. A sample (1  $\mu$ l) of total FAMEs was analysed with gas-liquid chromatography (Clarus 600 Perkin Elmer system, with Famewax RESTEK fused-silica capillary columns, 30-m  $\times$  0.32-mm inner diameter, 0.25- $\mu$ m film thickness). Oven temperature was programmed to increase from 110 to 220 °C at a rate of 2 °C/min, and the carrier gas was hydrogen (7.25 psi). Injector and detector temperatures were 225 and 245 °C, respectively.

### Liver sphingomyelin and ceramide analysis

Lipids were extracted from the liver (1 mg) as described by Bligh and Dyer<sup>12</sup> in dichloromethane/methanol (2% acetic acid)/water (2.5:2.5:2, v/v/v). Internal standards were added (ceramide [Cer]

d18:1/15:0, 16 ng; sphingomyelin [SM] d18:1/12:0, 16 ng). The solution was centrifuged at 458  $\times$ g for 3 min. The organic phase was collected and dried under azote and then dissolved in 50  $\mu$ l MeOH. Sample solutions were analysed using an Agilent 1290 UPLC system coupled to a G6460 triple quadrupole spectrometer (Agilent Technologies). MassHunter software was used for data acquisition and analysis. A Kinetex HILIC column was used for liquid chromatography separations. The column temperature was maintained at 40 °C. Mobile phase A was acetonitrile, and B was 10 mM ammonium formate in water at pH 3.2. The gradient was as follows: from 10 to 30% B in 10 min; 100% B from 10 to 12 min; and then back to 10% B at 13 min for 1 min to re-equilibrate before the next injection. The flow rate of the mobile phase was 0.3 ml/min, and the injection volume was 5  $\mu$ l. An electrospray source was used in positive ion mode. The collision gas was nitrogen. Needle voltage was set at +4,000 V. Several scan modes were used. First, to obtain the naturally different masses of different species, we analysed cell lipid extracts with a precursor ion scan at 184 and 264 *m/z* for SM and Cer, respectively. The collision energy optimums for Cer and SM were 25 and 45 eV, respectively. Then, the corresponding standard reference material transitions were used to quantify different phospholipid species for each class. Two 9 multiple-reaction monitoring acquisitions were necessary, owing to important differences between phospholipid classes. Data were treated with QqQ Quantitative (vB.05.00) and Qualitative Analysis software (vB.04.00).

### Microarray based transcriptome profiling

Liver RNA extraction was performed as mentioned previously and checked for integrity using Bioanalyzer. Microarray experiment and data normalisation were performed at the transcriptomic core facility at Cochin Institute. Briefly, gene expression profiling was carried out on five biological replicates per condition. After RNA quality validation with Bioanalyzer 2100, RNA was reversed transcribed following the manufacturer protocol (GeneChip® WT Plus Reagent Kit, Thermo Fisher). After fragmentation and biotin labelling, cDNA was hybridised to GeneChip® Clariom S Mouse (Thermo Fisher) and scanned using the GCS3000 7G. The images were analysed with Expression Console software (Thermo Fisher). Raw data were normalised using the robust multichip algorithm (RMA). Statistics and RMA normalisation were performed using TAC4.0 software (Thermo Fisher).

Downstream analysis was done to identify differentially expressed (DE) genes based on comparison with control conditions. The DE genes were selected based on the corrected *p* value for false discovery rate (FDR *p* value <0.05) and the fold change from OGT<sup>LKO</sup> mice compared with controls (upregulated genes: fold change  $\geq$ 2; downregulated genes: fold change  $\leq$ -2). A Venn diagram was performed using the interactive tool 'Venny 2.1.0'.<sup>13</sup> Upregulated and downregulated genes were annotated using Reactome gene set. Functional enrichment of specific pathways in the gene set was performed using Fisher's exact test and FDR correction. Pathways were considered significantly enriched at a FDR <0.05. R version 3.6.2 (R Foundation for Statistical Analysis) and R packages were used for bioinformatic analysis and graph representation. Volcano plots were represented using the 'Enhanced Volcano' package.<sup>14</sup> Heatmaps were represented using 'pheatmap' package,<sup>15</sup> where correlation clustering distance row was applied.



### Primary hepatocyte isolation and culture

Four-week-old mice were anaesthetised with a 10:1 ketamine–xylazine solution intra-peritoneally. Liver was perfused through the portal vein with HBSS followed by collagenase perfusion. Cell viability was calculated by the trypan blue exclusion test using a Malassez chamber and seeded in six-well plates at a concentration of 500,000 cells per well. Cells were seeded in medium M199 5 mM of glucose (Thermo Fisher, #11150059) supplemented with 100 µg/ml streptomycin, 100 U/ml of penicillin, L-glutamine (2 mM), 0.1% bovine serum albumin, 2.5% Nu-Serum (BD Bioscience, Cat#355104), and dexamethasone (100 nM, Novo Nordisk). For reduced glutathione/oxidised glutathione (GSH/GSSG) assay, hepatocytes were seeded in 96-well plates at a concentration of 15,000 cells per well. Twenty-four hours after seeding, the GSH/GSSG ratio was measured using the GSH/GSSG-Glo assay kit (Promega) in accordance with the manufacturer's instructions. Experiments with staurosporine (StS) were performed by seeding hepatocytes in 6-cm<sup>2</sup> dishes at a concentration of  $1.5 \times 10^6$  cells per dish. Twenty-four hours after seeding, cells were treated with 10 µM of StS (Sigma, S4400) and harvested 0, 2, 4, and 8 h after treatment for protein extraction. For thapsigargin experiments, 24 h after seeding, cells were treated with 0.3 µM of thapsigargin (Sigma, T9033) for 24 h. The total level of lipid peroxidation was analysed by flow cytometry-based BODIPY 581/591 assays (Molecular Probes), as recommended by the manufacturer. Forty-eight hours after seeding, cells were treated with 5 µM of BODIPY for 30 min at 37 °C. Cells were then collected and washed with PBS. For each experiment, 20,000 events were acquired by flow cytometry using a NovoCyte cytometer (Ozyme). Data were analysed using the NovoExpress software. Total reactive oxygen species (ROS) levels were measured by using the CellROX Deep Red reagent (Thermo Fisher) at a final concentration of 2.5 µM and then incubated for 30 min at 37 °C. Data were analysed using the NovoExpress software. For antioxidant response element (ARE) luciferase activity, cells were transfected with a 3 × ARE luciferase reporter<sup>16</sup> and a β-galactosidase plasmid using Lipofectamine 2000 and Opti-MEM media. After overnight incubation, medium was changed to low glucose (5 mM) for 24 h. Luciferase assay was performed after cell lysis. β-Galactosidase assays were performed for normalisation of 3 × ARE luciferase activity.

### SHG microscopy for fibrosis quantification

Second harmonic generation (SHG) images were acquired using a multiphoton Leica DIVE microscope (Leica Microsystems GmbH, Wetzlar, Germany) coupled with a Coherent Discovery (Coherent Inc., Santa Clara, CA, USA) laser source. Five fields of view were acquired from paraffin-embedded 7-µm-thick sections of liver. Two-photon-excited autofluorescence and SHG images were acquired through a Leica Microsystems HCX IRAPO 25 × /0.95 water immersion objective by tuning the laser at 1,040 nm at constant power, and photomultiplier tubes and hybrid detectors were used at constant 800 V and 80% gain, respectively, allowing direct comparison of SHG intensity values. Circularly polarised laser pulse was sent to the microscope objective to excite isotropically the slice regardless of the orientation of fibrillar collagen. To quantify SHG, the microscope was calibrated using a non-fibrotic control liver section. SHG score was proceeded using a home-made ImageJ (<http://imagej.nih.gov/ij/>) routine, as described previously.<sup>17</sup>

### Statistical analysis

All statistical analysis were performed using Prism (GraphPad Software Inc.F, San Diego, CA, USA). The number of independent experiments performed and the statistical test used are indicated in each figure legend. To compare two groups, unpaired student *t* test (Mann–Whitney *U* test) was used, while for 2 and additional groups, two-way Anova followed by Bonferroni *post hoc* test was used.

## Results

### Hepatocyte-specific OGT deletion triggers liver inflammation and moderate fibrosis at 4 weeks

Four weeks after birth, fed blood glucose, body weight, liver and spleen weight were not found different in OGT<sup>LKO</sup> mice compared with OGT<sup>LWT</sup> mice (Fig. 1A). OGT mRNA and protein levels (assessed by Western blot and immunostaining) were significantly reduced only in the liver of OGT<sup>LKO</sup> mice, together with a parallel decrease in *O*-GlcNAcylated proteins (Fig. 1B, D, and E), confirming recombination efficiency and tissue specificity. We also observed a significant decrease in OGA expression in the liver (Fig. 1C). The activities of OGT and OGA are governed by multi-layered feedback mechanisms that finely tune the overall levels of *O*-GlcNAcylation in the cell. Studies have established that alterations in OGA activity affect OGT activity and vice versa.<sup>18</sup> Although the mechanisms used to modulate OGA protein levels in response to *O*-GlcNAc remain unknown, studies have suggested that OGA transcription is sensitive to changes in *O*-GlcNAc homeostasis and is potentially regulated by *O*-GlcNAc.<sup>18</sup> Further analysis revealed decreased blood concentrations upon short-term fasting (5 h) (Fig. S1A), improved glucose (Fig. S1B), and pyruvate tolerance (Fig. S1C) in OGT<sup>LKO</sup> mice compared with OGT<sup>LWT</sup> mice, without, however, any modification in insulin sensitivity (Fig. S1D). Decreased fasting blood glucose and increased pyruvate tolerance suggested decreased gluconeogenic capacity in OGT<sup>LKO</sup> mice compared with OGT<sup>LWT</sup> mice. To better understand the improvement in glucose homeostasis observed in OGT<sup>LKO</sup> mice, we measured protein and *O*-GlcNAcylation levels<sup>4</sup> of the transcription factor Foxo1 (Fig. S1E), which is known to stimulate the expression of gluconeogenic genes, including glucose-6-phosphatase (*G6Pase*) and phosphoenolpyruvate carboxykinase (*Pepck*) (Fig. S1F). Of note, Foxo1 *O*-GlcNAcylation levels were markedly decreased in the liver of OGT<sup>LKO</sup> mice compared with OGT<sup>LWT</sup> mice (Fig. S1E), as well as mRNA levels of its target genes (*G6Pase* and *Pepck*) (Fig. S1F). Histological assessment by H&E, Sirius Red, or αSMA staining evidenced hepatic parenchymal alteration in OGT<sup>LKO</sup> mice compared with OGT<sup>LWT</sup> mice. In fact, OGT<sup>LKO</sup> livers showed hepatocellular ballooning and moderate fibrosis together with fibroblast activation (Fig. 1E). In agreement, the expression of fibrosis markers (transforming growth factor beta [*Tgfb*], αSma, collagen type III alpha 1 chain [*Col3a1*], and collagen type VI alpha 1 chain [*Col6a1*]) was found significantly increased in livers of OGT<sup>LKO</sup> mice compared with OGT<sup>LWT</sup> mice (Fig. 1F). In addition, positive staining for TUNEL, cytokeratin 7 (Krt7), and SOX9 in livers of 4-week-old OGT<sup>LKO</sup> mice suggested emerging liver injury and apoptosis, ductular reaction, and hepatic progenitor cell activation (Fig. 1E). This observation was correlated with a significant increase in ALT in OGT<sup>LKO</sup> mice, whereas two other markers of liver injury (AST and LDH) were not found statistically different



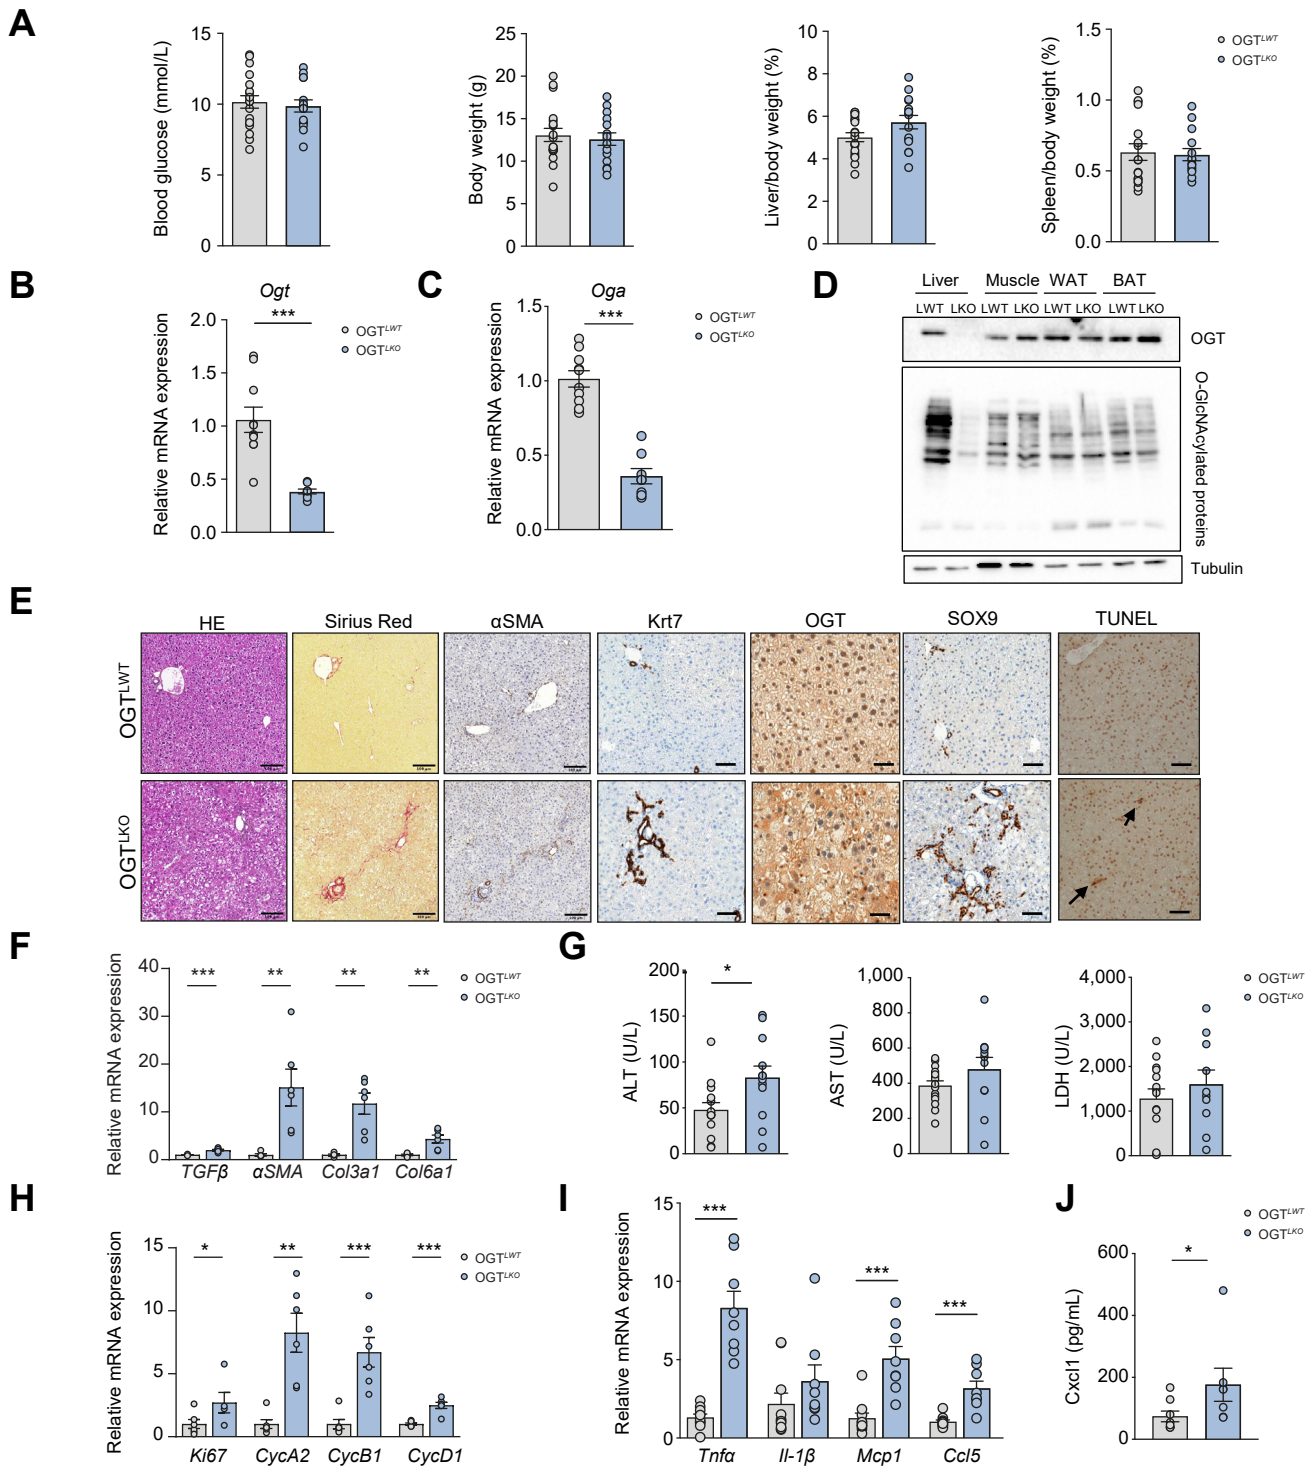

**Fig. 1. Hepatocyte-specific OGT deletion leads to liver inflammation and moderate liver injury at 4 weeks.** Male liver-specific *Ogt* knockout mice ( $OGT^{LKO}$ ) and control floxed littermates ( $OGT^{LWT}$ ) were studied 4 weeks after birth in the fed state. (A) Fed blood glucose (mmol/L), body weight (g), liver weight, and spleen weight are shown. Liver and spleen weights are represented as percentage of body weight. (B) Relative *Ogt* expression normalised to TBP. (C) Relative *Oga* expression normalised to TBP. (D) Western blot analysis of OGT and O-GlcNAcylation levels in the liver, muscle, WAT, and BAT of  $OGT^{LWT}$  and  $OGT^{LKO}$  mice. Tubulin was used as a loading control. One representative sample is presented per condition. (E) Liver sections stained with H&E, Sirius Red,  $\alpha$ SMA, Krt7, OGT, SOX9, and TUNEL. Scale bars = 100  $\mu$ m. (F) Relative expression levels of fibrosis markers normalised to TBP. (G) Serum levels of ALT, AST, and LDH. (H) Relative expression levels of proliferation markers normalised to TBP. (I) Relative expression levels of inflammatory markers normalised to TBP. (J) Serum levels of Cxcl1. Data are shown as mean  $\pm$  SEM of 5–10 individual male mice. \* $p < 0.05$ , \*\* $p < 0.01$ , \*\*\* $p < 0.001$  by unpaired Student's *t* test (Mann–Whitney *U* test).  $\alpha$ SMA, alpha-smooth muscle actin; ALT, alanine aminotransferase; AST, aspartate aminotransferase; BAT, brown adipose tissue; Ccl5, C–C motif chemokine ligand 5; Col3a1, collagen type III alpha 1 chain; Col6a1, collagen type VI alpha 1 chain; Cxcl1, C–X–C motif chemokine ligand 1; CycA2, cyclin A2; CycB1, cyclin B1; CycD1, cyclin D1; Krt7, cytokeratin 7; LDH, lactate dehydrogenase; Mcp1, monocyte chemoattractant protein-1; Oga, O-GlcNAcase; OGT, O-GlcNAc transferase; SOX9, sex determining region Y-box 2; TBP, TATA-box binding protein; TGF $\beta$ , transforming growth factor beta; Tnfa, tumour necrosis factor alpha; TUNEL, terminal deoxynucleotidyl transferase dUTP nick end labelling; WAT, white adipose tissue.

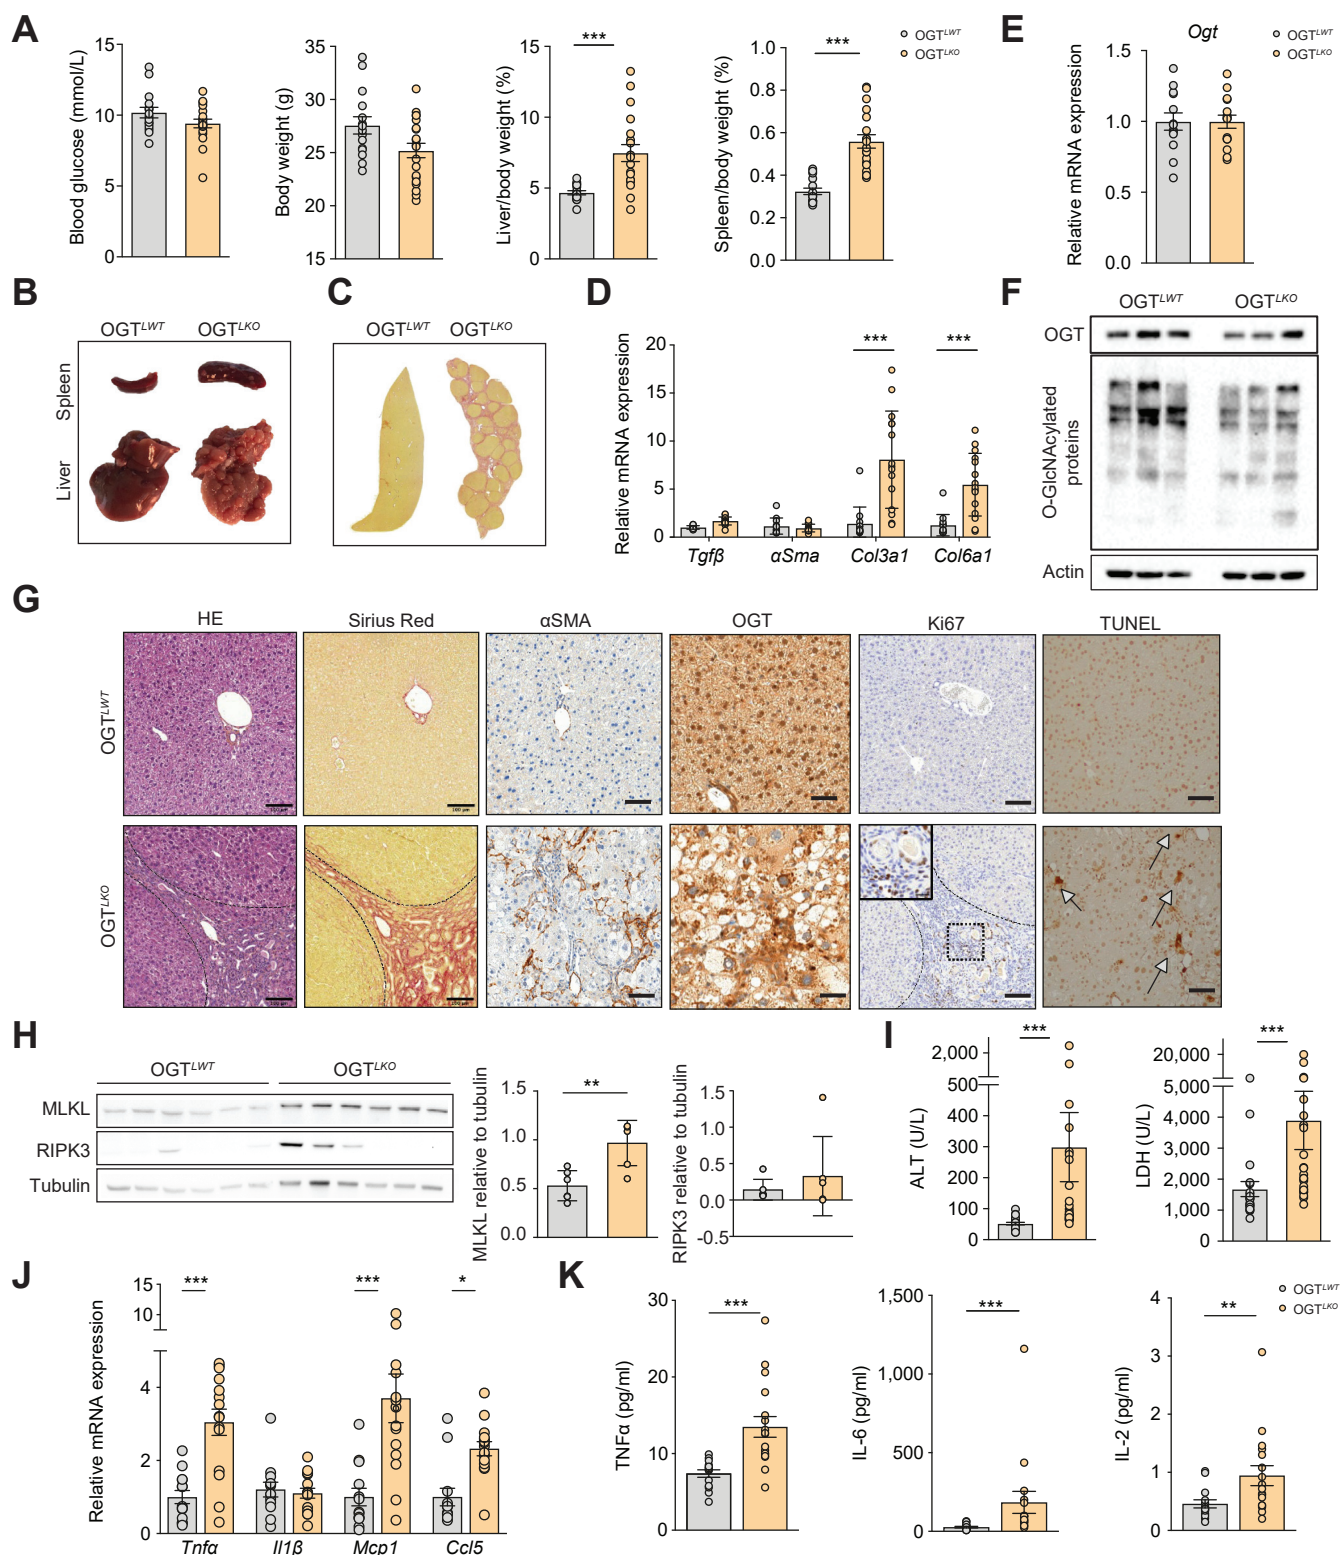

**Fig. 2. OGT<sup>LKO</sup> mice exhibit liver extensive fibrosis at 8 weeks.** Male liver-specific *Ogt* knockout mice (OGT<sup>LKO</sup>) and control floxed littermates (OGT<sup>LWT</sup>) were studied 8 weeks after birth in the fed state. (A) Fed blood glucose (mmol/L), body weight (g), liver weight, and spleen weight are shown. Liver and spleen weights are represented as percentage of body weight. (B) Macroscopic view of spleen and liver from OGT<sup>LWT</sup> (left) and OGT<sup>LKO</sup> (right) mice. (C) Macroscopic view of histological liver section stained with Sirius Red. (D) Relative expression levels of fibrosis markers normalised to TBP. (E) Expression levels of OGT normalised to TBP. (F) Western blots of OGT content and O-GlcNAcylation levels in livers of OGT<sup>LWT</sup> and OGT<sup>LKO</sup> mice at 8 weeks. Three representative samples are shown. Actin was used for normalisation. (G) Liver sections stained with H&E, Sirius Red, αSMA, OGT, Ki67, and TUNEL. Scale bars = 100 μm. (H) Western blot analysis of necroptosis proteins (MLKL and RIPK3). Six representative samples are shown. Tubulin was used for normalisation and quantification. (I) Serum levels of ALT and LDH. (J) Relative expression levels of inflammatory markers normalised to TBP. (K) Serum levels of inflammatory cytokines. Data are shown as mean ± SEM of

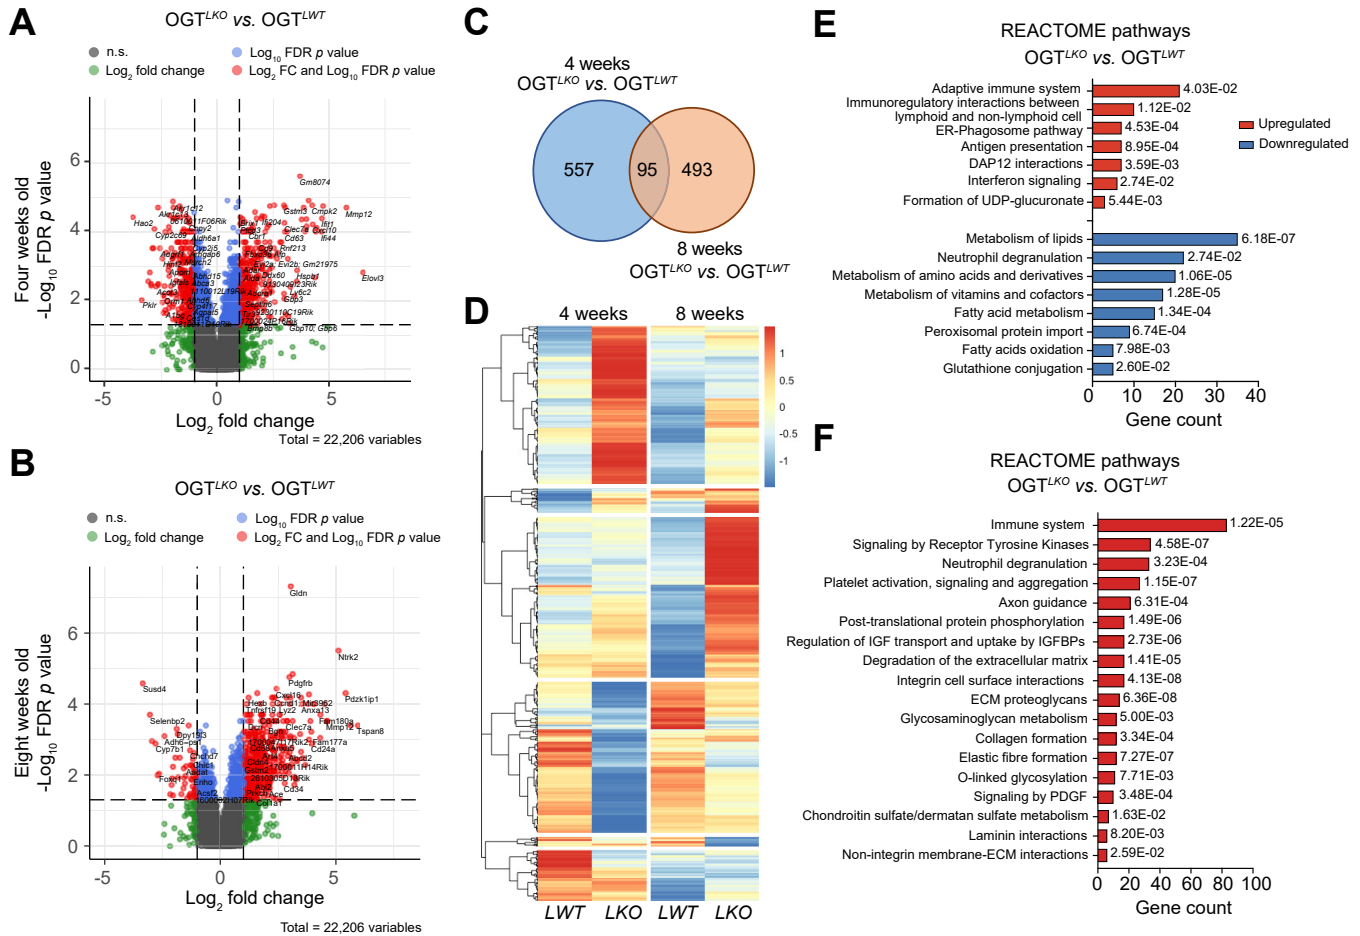

**Fig. 3. Microarray analysis in liver reveals specific transcriptional changes at 4 and 8 weeks in OGT<sup>LKO</sup> mice.** Results were generated using microarray data from five replicates per condition. (A and B) Volcano plot representing differential gene expression of 22,206 genes comparing livers from OGT<sup>LKO</sup> and OGT<sup>LWT</sup> mice 4 (A) and 8 (B) weeks after birth. Log<sub>2</sub>FC is represented in the X-axis and log<sub>10</sub>FDR p value in the Y-axis. FC ≥|2| and FDR p value <0.05 were taken as cut-off parameters for selection of DE genes, represented in red. (C) Venn diagram of DE genes in the liver of 4- and 8-week-old mice. (D) Hierarchical clustering showing differential expression of genes in liver of OGT<sup>LKO</sup> mice compared with OGT<sup>LWT</sup> mice. (E and F) Top Reactome pathways significantly upregulated or down-regulated using the DE genes between male OGT<sup>LKO</sup> and OGT<sup>LWT</sup> mice at 4 (E) or 8 (F) weeks. DE, differentially expressed; ECM, extracellular matrix; ER, endoplasmic reticulum; FC, fold change; FDR, false discovery rate; IGFBP, insulin-like growth factor binding protein; OGT, O-GlcNAc transferase; PDGF, platelet-derived growth factor.

between the two groups of mice (Fig. 1G). The expression of proliferation markers was also significantly induced in the liver of OGT<sup>LKO</sup> mice compared with OGT<sup>LWT</sup> mice (*Ki67*, *CycA2*, cyclin B1 [*CycB1*], and *CycD1*) (Fig. 1H). To investigate the potential development of inflammation in the context of liver injury, we examined the expression of inflammatory markers. Significant induction of tumour necrosis factor alpha (*Tnfa*), monocyte chemoattractant protein-1 (*Mcp1*), and C-C motif chemokine ligand 5 (*Ccl5*) was observed in the liver of OGT<sup>LKO</sup> compared with OGT<sup>LWT</sup> mice (Fig. 1I). Analyses of serum pro-inflammatory cytokine and chemokine levels in 4-week-old mice also revealed a significant increase in C-X-C motif chemokine ligand 1 (*Cxcl1*) concentration (Fig. 1J). Altogether, these results reveal that constitutive hepatic deletion of OGT in mice rapidly triggers early signs of liver injury,

as illustrated by the onset of inflammation, apoptosis, and moderate fibrosis at 4 weeks of age.

**OGT<sup>LKO</sup> mice exhibit necroptosis, extensive liver fibrosis, and liver injury at 8 weeks**

To determine whether the emerging phenotype of liver injury observed in 4-week-old OGT<sup>LKO</sup> mice worsens with time, both male (Fig. 2 and Fig. S2) and female (Fig. S3) OGT<sup>LKO</sup> mice were studied 8 weeks after birth. Similar blood glucose concentrations and body weights were observed in 8-week-old male OGT<sup>LWT</sup> and OGT<sup>LKO</sup> mice (Fig. 2A), whereas both liver and spleen weights were significantly increased in OGT<sup>LKO</sup> mice compared with OGT<sup>LWT</sup> mice, regardless of sex (Fig. 2A). Interestingly, a dysmorphic liver with hepatic nodules together with

13–15 male mice per condition. \*p <0.05, \*\*p <0.01, \*\*\*p <0.001 by unpaired Student's *t* test (Mann-Whitney *U* test). αSMA, alpha-smooth muscle actin; ALT, alanine aminotransferase; Ccl5, C-C motif chemokine ligand 5; Col3a1, collagen type III alpha 1 chain; Col6a1, collagen type VI alpha 1 chain; LDH, lactate dehydrogenase; Mcp1, monocyte chemoattractant protein-1; MLKL, mixed lineage kinase domain-like pseudokinase; OGT, O-GlcNAc transferase; RIPK3, receptor-interacting serine/threonine-protein kinase 3; TBP, TATA-box binding protein; Tgfb, transforming growth factor beta; Tnfa, tumour necrosis factor alpha; TUNEL, terminal deoxynucleotidyl transferase dUTP nick end labelling.



splenomegaly was observed macroscopically at sacrifice in a large proportion of OGT<sup>LKO</sup> mice (Fig. 2B). The macroscopic view of the histological liver section of OGT<sup>LKO</sup> mice from Sirius Red staining showed a homogeneous distribution of these nodules, which were identified as regeneration nodules typical of

chronically injured livers (Fig. 2B and C). Of note, clear signs of advanced hepatic fibrosis were observed in OGT<sup>LKO</sup> liver sections, regardless of the presence of macroscopic regenerative nodules (Fig. S2D). In agreement, mRNA levels of fibrosis markers (*Col3a1* and *Col6a1*) were significantly increased in both male and female

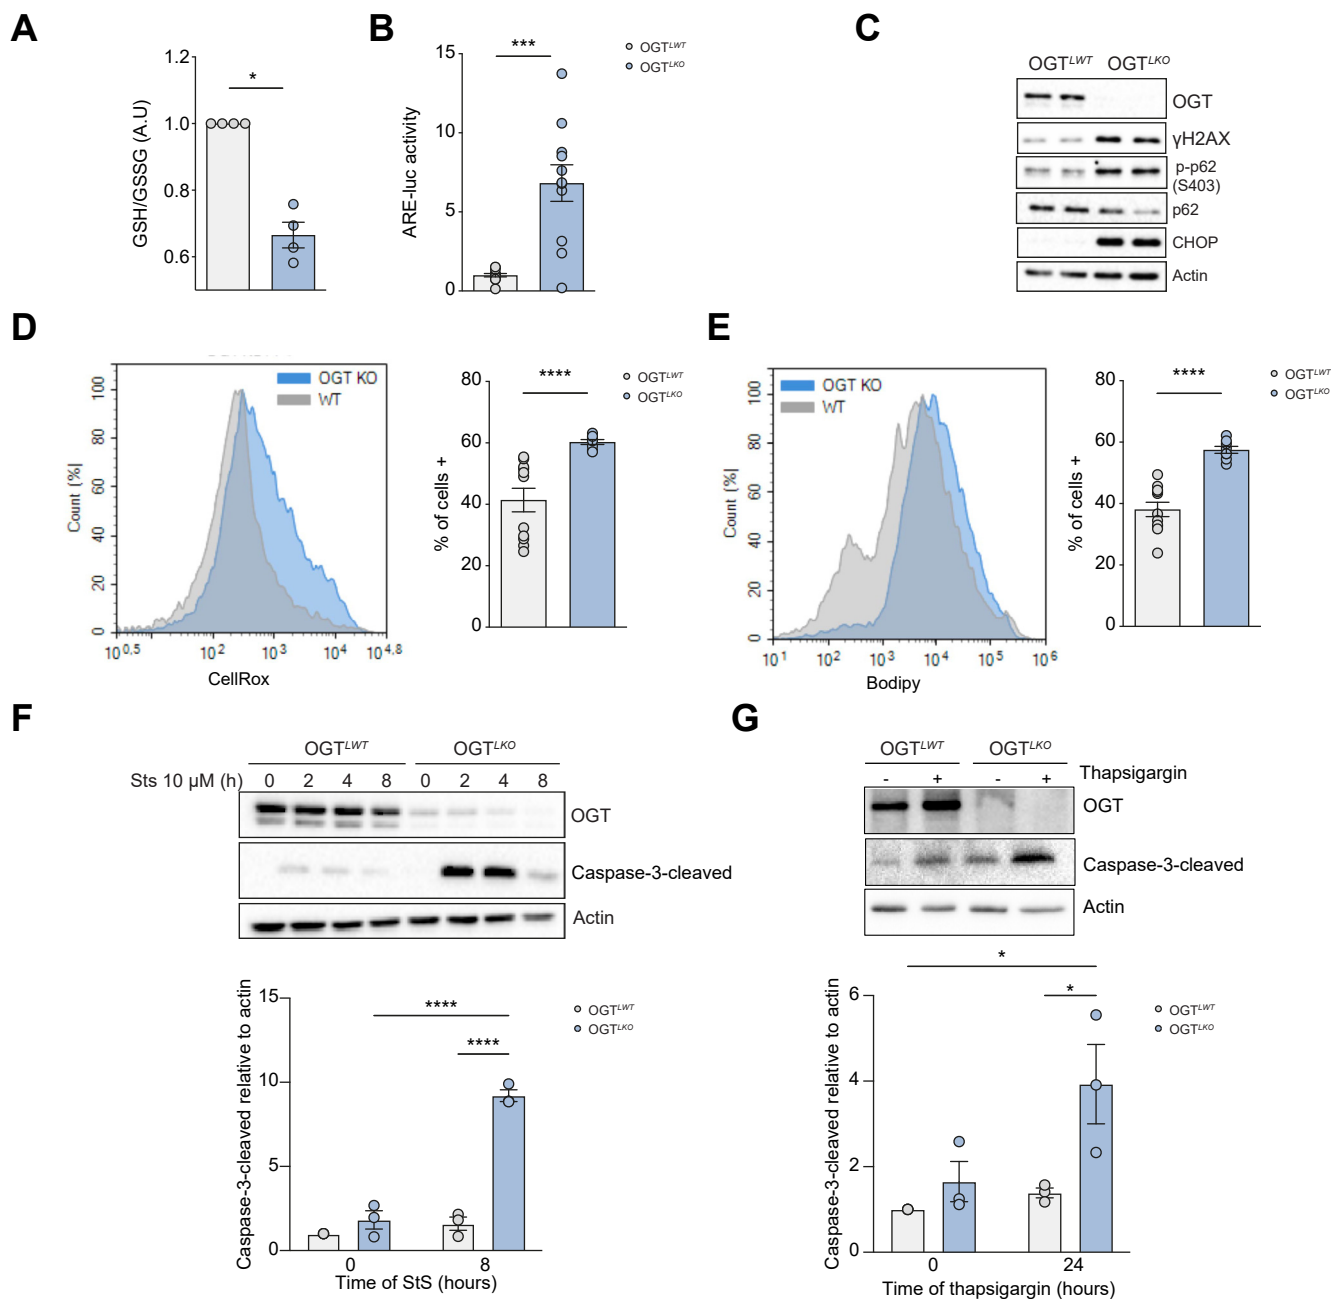

**Fig. 4. Hepatic OGT deficiency leads to oxidative stress, ER stress, DNA damage, and enhanced sensitivity to cell death.** Experiments were performed in primary cultured hepatocytes from 4-week-old male and female mice. (A) Ratio of GSH/GSSG. (B) NRF2 activity measured upon transfection with a plasmid containing a 3  $\times$  ARE luciferase NRF2 reporter gene. (C) Western blot analysis of OGT, markers of oxidative stress, ER stress, and DNA damage markers. Two representative samples are shown. (D) Total ROS levels measured by CellRox (Ozyme). (E) Lipid peroxidation analysed by flow cytometry-based BODIPY 581/591 assays (Molecular Probes). (F) Western blot analysis of OGT and cleaved caspase-3 after 8 h of StS treatment. Actin was used as a loading control, and quantification for 8 h post StS treatment is shown. (G) Western blot analysis of OGT and cleaved caspase-3 after 24 h of thapsigargin treatment. Actin was used as a loading control, and quantification for cleaved caspase-3 is shown. Data are shown as mean  $\pm$  SEM of two to five independent cultures done in triplicate. \**p* < 0.05, \*\*\**p* < 0.001, \*\*\*\**p* < 0.0005 by unpaired Student's *t* test (Mann-Whitney *U* test) (panels A, B, D, E). \**p* < 0.05, \*\*\*\**p* < 0.0005 by two-way Anova followed by Bonferroni *post hoc* test (panels F and G). ARE, antioxidant response element; CHOP, CCAAT-enhancer-binding protein homologous protein; ER, endoplasmic reticulum; GSH, reduced glutathione; GSSG, oxidised glutathione; H2AX, H2AX variant histone; NRF2, nuclear factor erythroid-derived 2-related factor; OGT, O-GlcNAc transferase; ROS, reactive oxygen species; StS, staurosporine.

OGT<sup>LKO</sup> mice (Fig. 2D and Fig. S3F), and parallel Sirius Red and  $\alpha$ SMA staining showed fibroblast activation and advanced fibrosis in OGT<sup>LKO</sup> livers (Fig. 2G and Fig. S3D). Surprisingly, analysis of OGT mRNA and protein levels revealed recovery of OGT expression in livers of OGT<sup>LKO</sup> mice compared with OGT<sup>LWT</sup>

mice, despite a less pronounced effect in females than in males (Fig. 2E and F and Fig. S3C). However, OGT immunolabelling showed OGT-positive cells in OGT<sup>LKO</sup> liver sections regardless of sex (Fig. 2G and Fig. S3D), suggesting counterselection against OGT-deficient cells during liver regeneration.<sup>19</sup> The emergence of

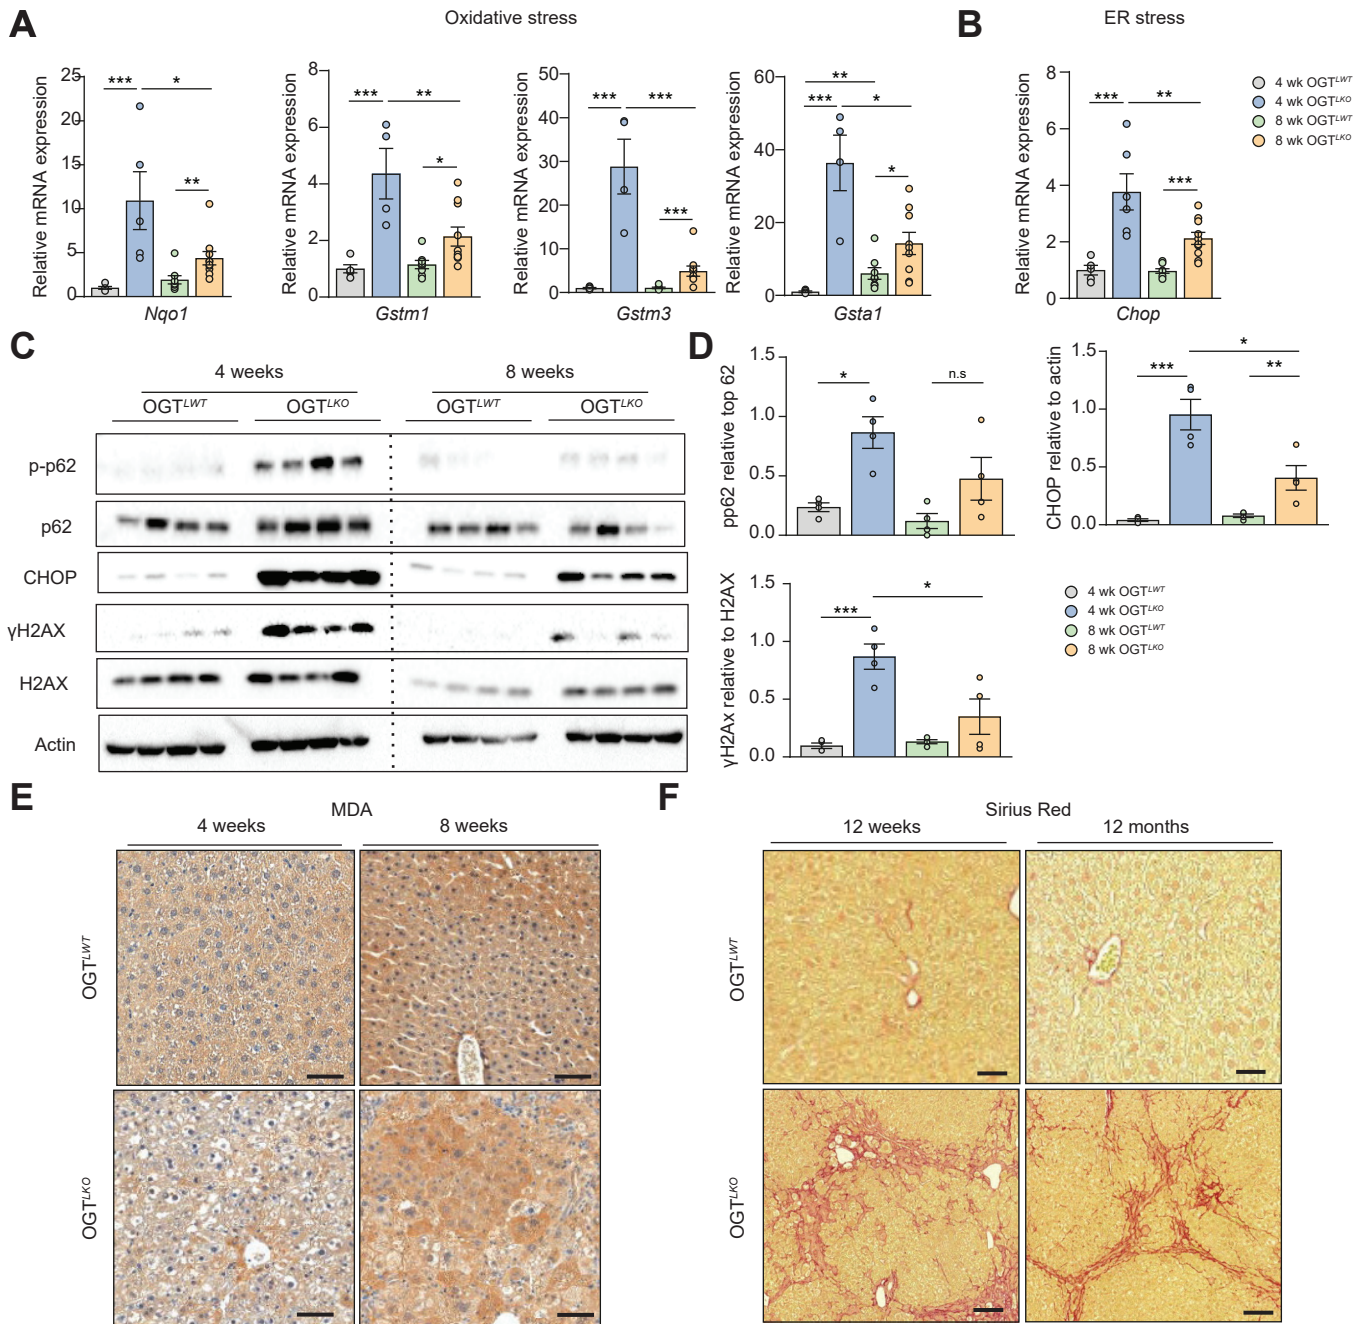

**Fig. 5. Oxidative stress, ER stress, lipid peroxidation, and DNA damage in livers of 4 and 8 weeks old OGT<sup>LKO</sup> mice.** Male liver-specific *Ogt* knockout mice (OGT<sup>LKO</sup>) and control floxed littermates (OGT<sup>LWT</sup>) were studied 4 and 8 weeks after birth in the fed state. (A) Relative expression levels of oxidative stress markers normalised to TBP. (B) Relative expression of *Chop* normalised to TBP. (C) Western blots showing protein content in whole liver lysates of markers of oxidative stress (p-p62), ER stress (CHOP), and DNA damage ( $\gamma$ H2AX) normalised to actin. Cropped membranes are indicated with discontinued lines. (D) Quantification of p-p62, CHOP, and  $\gamma$ H2AX is shown. (E) MDA staining in liver sections from 4- and 8-week-old OGT<sup>LWT</sup> and OGT<sup>LKO</sup> mice. Scale bars = 100  $\mu$ m. (F) Liver sections from OGT<sup>LWT</sup> and OGT<sup>LKO</sup> mice at 12 weeks and 12 months of age stained with Sirius Red. Scale bars = 100  $\mu$ m. Data are shown as mean  $\pm$  SEM of 8–10 mice at 4 weeks, 13–15 mice at 8 weeks, 18–20 mice at 12 weeks, and 18–20 mice at 1 year. \**p* < 0.05, \*\**p* < 0.01, \*\*\**p* < 0.001 by two-way Anova followed by Bonferroni *post hoc* test. CHOP, CCAAT-enhancer-binding protein homologous protein; ER, endoplasmic reticulum; *Gsta1*, glutathione S-transferase alpha 1; *Gstm1*, glutathione S-transferase mu 1; *Gstm3*, glutathione S-transferase mu 3; H2AX, H2AX variant histone; MDA, malondialdehyde; NqO1, NAD(P)H quinone dehydrogenase 1; OGT, O-GlcNAc transferase; TBP, TATA-box binding protein.

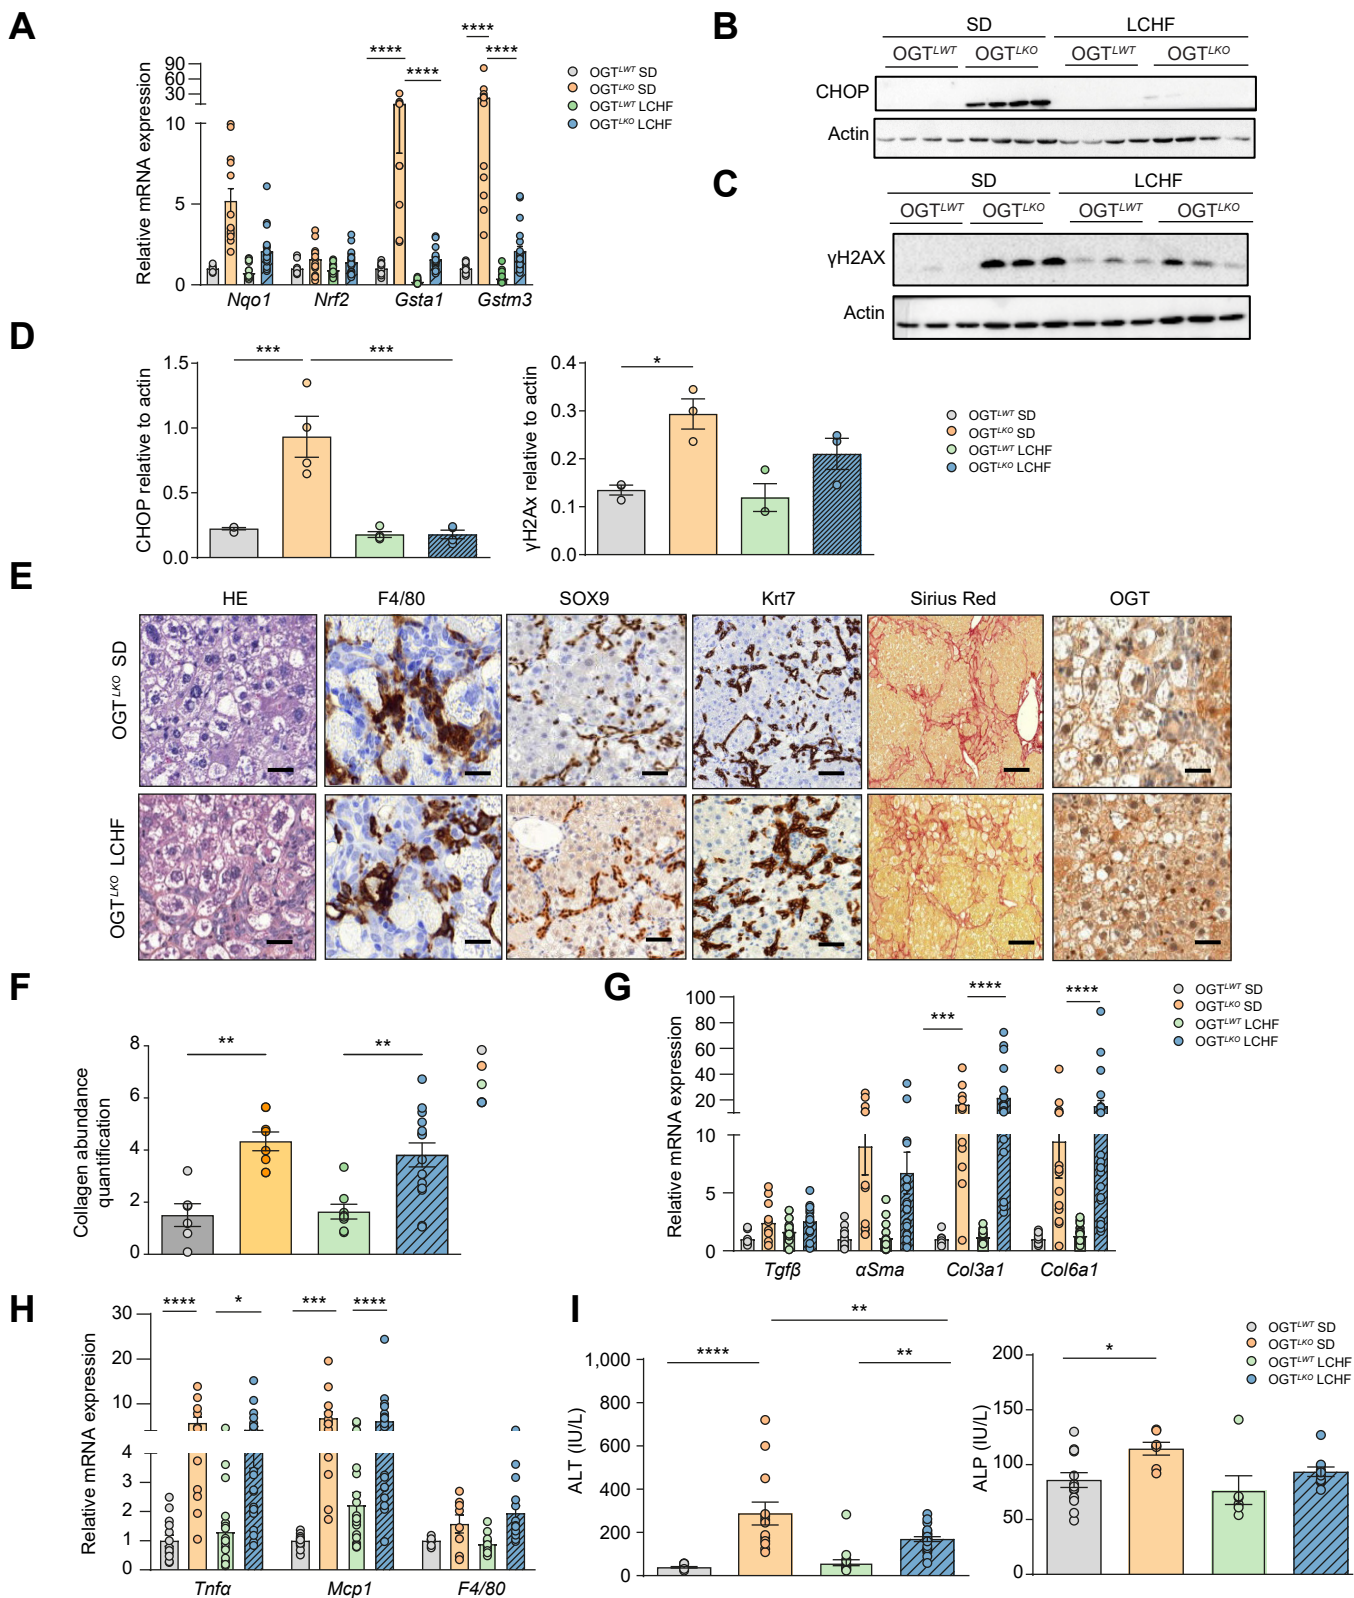

**Fig. 6. LCHF diet improves oxidative stress, ER stress, and DNA damage but not fibrosis in *OGT<sup>LKO</sup>* mice.** Liver-specific *Ogt* knockout mice (*OGT<sup>LKO</sup>*) and control floxed littermates (*OGT<sup>LWT</sup>*) (males and females) were weaned (at 3 weeks of age) on an LCHF diet and sacrificed 5 weeks later in the fed state. (A) Relative expression levels of oxidative stress markers normalised to TBP. (B) Western blot analysis of CHOP protein content in livers of *OGT<sup>LWT</sup>* and *OGT<sup>LKO</sup>* mice on either SD or LCHF diet. Four representative samples are shown. (C) Western blot analysis of  $\gamma$ H2AX protein content in livers of *OGT<sup>LWT</sup>* and *OGT<sup>LKO</sup>* mice on either SD or LCHF diet. Three representative samples are shown. (D) Quantification of CHOP and  $\gamma$ H2AX is shown. Actin was used as a loading control. (E) Liver sections stained with H&E, F4/80, SOX9, Krt7, Sirius Red, and OGT. Scale bars = 100  $\mu$ m. (F) Quantification of fibrosis SHG microscopy. (G) Relative expression levels of fibrosis



TUNEL-positive cells in OGT<sup>LKO</sup> liver sections as well as Ki67-positive cells in hepatic tissue surrounding the regenerative nodules of OGT<sup>LKO</sup> livers (Fig. 2G) suggested an activation of both proliferation and apoptosis pathways. Accordingly, the expression of proliferation markers was significantly induced in livers of OGT<sup>LKO</sup> mice compared with OGT<sup>LWT</sup> mice at both mRNA (*Ki67*, *CycA2*, *CycB1*, and *CycD1*) and protein levels (cyclin A, cyclin D1, and PCNA) (Fig. S2C and Fig. 2C). Although the expression of RIPK3 was unchanged in OGT<sup>LKO</sup> livers, the expression of MLKL, another key protein of necroptosis, was significantly increased (Fig. 2H). In agreement, OGT<sup>LKO</sup> mice exhibited a significant increase in plasma ALT and LDH concentrations (Fig. 2I), whereas the circulating levels of AST, another marker of liver injury, was unchanged (Fig. S3E). The expression of inflammatory markers (*Tnfa*, *Mcp1*, and *Ccl5*) and plasma concentrations of cytokines (TNF $\alpha$ , IL-2, and IL-6) were also increased in livers of OGT<sup>LKO</sup> mice compared with the OGT<sup>LWT</sup> control group (Fig. 2J and K). A similar phenotype comprising inflammation, fibrosis, and liver injury was observed in 8-week-old OGT<sup>LKO</sup> female mice (Fig. S3H and Fig. 3H). Therefore, either males or females, or both, were used in further experiments, as indicated in the figure legends. Finally, we next investigated whether OGT<sup>LKO</sup> liver alterations were associated with early (4 weeks) or later (8 weeks) changes in cell identity following deletion of hepatic OGT (Fig. S2F). A marked increase in mRNA levels of progenitor cells and cholangiocyte markers, *Krt7* and *Krt19*, was observed in livers of OGT<sup>LKO</sup> mice compared with OGT<sup>LWT</sup> mice of both ages, although differences were more pronounced at 8 weeks (Fig. S2G). Immunolabelling of HNF4 $\alpha$ , SOX9, and *Krt19* on liver sections confirmed a ductular reaction, mostly localised in the fibrosis septa in older OGT<sup>LKO</sup> mice (Fig. S2H). Whereas total or direct bilirubin was not changed, a significant increase in serum ALP was measured in 8-week-old OGT<sup>LKO</sup> mice compared with OGT<sup>LWT</sup> mice (Fig. S2E). Taken together, our results suggest that OGT plays an important role in liver cell identity and that its deficiency leads to a rapid deterioration of liver homeostasis in OGT<sup>LKO</sup> mice.

### Hepatocyte OGT deletion leads to specific transcriptional changes in the liver from 4- and 8-week-old OGT<sup>LKO</sup> mice

To better characterise the early and late consequences of hepatic OGT deficiency, we performed a transcriptomic analysis on livers from 4- and 8-week-old OGT<sup>LKO</sup> and OGT<sup>LWT</sup> mice. Volcano plots, which were generated by using a total of 22,206 hepatic genes and by comparing OGT<sup>LKO</sup> mice with OGT<sup>LWT</sup> mice, demonstrated a shift in the expression levels of specific genes between the two time points studied (4 and 8 weeks) (Fig. 3A and B). The Venn diagram (fold change  $\geq$ 2, FDR  $p$  value  $<$ 0.05) indicated that 557 and 493 genes were differentially expressed at 4 and 8 weeks, respectively, with 95 differentially expressed genes common to 4- and 8-week-old mice (Fig. 3C and Table S3). Several gene clusters were differentially regulated in OGT<sup>LKO</sup> livers as compared with OGT<sup>LWT</sup> livers at 4 and 8 weeks, as illustrated by

the heatmap analysis (Fig. 3D). Analysis of Reactome pathways in the liver of 4-week-old mice showed a significant down-regulation in basic metabolic pathways such as lipid, amino acid, and vitamin metabolism (Fig. 3E). Interestingly, the glutathione metabolism pathway, an important detoxification pathway in the liver,<sup>20</sup> was also significantly downregulated at this stage (Fig. 3E). In parallel, the expression of genes involved in immune signalling pathways and UDP-glucuronate formation, the latest known to be activated during antioxidant response in the liver,<sup>21</sup> were upregulated at 4 weeks in OGT<sup>LKO</sup> mice (Fig. 3E). Surprisingly, analysis of differentially expressed genes at 8 weeks only reported upregulated pathways. Upregulation of genes involved in immune system activation suggested that the inflammation response was not resolved at 8 weeks. However, an upregulation of pathways involved in liver injury and its resolution such as formation and degradation of extracellular matrix was observed (Fig. 3F and Fig. S4D). Altogether, the results indicate specific changes in global mRNA expression occurring between 4 and 8 weeks, indicating early and major molecular adaptations in the liver to cope with the loss of hepatic OGT.

### OGT deficiency in hepatocytes leads to oxidative stress, ER stress, and enhanced sensitivity to cell death

Given that the transcriptomic analysis revealed that a cluster of DE genes involved in the oxidative stress response was significantly upregulated in OGT<sup>LKO</sup> livers at 4 weeks (Fig. S4A), we performed experiments in primary hepatocytes isolated from 4-week-old OGT<sup>LKO</sup> mice. Interestingly, the GSH/GSSG ratio, a reliable indicator of oxidative stress, was significantly decreased in OGT<sup>LKO</sup> hepatocytes compared with OGT<sup>LWT</sup> hepatocytes, supporting enhanced hepatic oxidative stress response in 4-week-old OGT<sup>LKO</sup> mice (Fig. 4A). Because oxidative stress response involves binding of nuclear factor erythroid-derived 2-related factor 2 (NRF2) on ARE located on promoters of antioxidant response genes, we monitored NRF2 activity in OGT<sup>LKO</sup> and OGT<sup>LWT</sup> hepatocytes, by using an ARE luciferase reporter construct.<sup>16</sup> ARE luciferase activity was increased by sevenfold in OGT<sup>LKO</sup> hepatocytes compared with OGT<sup>LWT</sup> hepatocytes, suggesting that the NRF2 antioxidant response was induced in the absence of OGT (Fig. 4B). In agreement, an increase in p-p62 (autophagy-related oxidative stress),<sup>22,23</sup>  $\gamma$ H2AX (DNA damage), and CHOP (ER stress-derived apoptosis) was observed in hepatocytes from OGT-deficient cells compared with OGT<sup>LWT</sup> hepatocytes (Fig. 4C). To further characterise oxidative stress in OGT<sup>LKO</sup> hepatocytes, total ROS and total lipid peroxidation were assayed using CellROX and BODIPY assays. Both parameters were found significantly increased in OGT<sup>LKO</sup> hepatocytes compared with OGT<sup>LWT</sup> hepatocytes (Fig. 4D and E). Sensitivity of OGT<sup>LKO</sup> hepatocytes to oxidative stress-dependent apoptosis was next evaluated over an 8-h time course in primary hepatocytes treated with StS<sup>24</sup> (Fig. 4F). Higher levels of cleaved caspase-3, a marker of apoptosis, were observed in OGT-deficient cells compared with OGT<sup>LWT</sup> hepatocytes upon StS treatment, indicating enhanced sensitivity to StS-induced cell

markers normalised to TBP. (H) Relative expression levels of inflammatory markers normalised to TBP. (I) Serum levels of ALT and ALP. Data are shown as mean  $\pm$  SEM of 4–13 mice (males and females). \* $p$   $<$ 0.05, \*\* $p$   $<$ 0.01, \*\*\* $p$   $<$ 0.001, \*\*\*\* $p$   $<$ 0.0005 by two-way Anova followed by Bonferroni *post hoc* test.  $\alpha$ SMA, alpha-smooth muscle actin; ALP, alkaline phosphatase; ALT, alanine aminotransferase; CHOP, CCAAT-enhancer-binding protein homologous protein; Col3a1, collagen type III alpha 1 chain; Col6a1, collagen type VI alpha 1 chain; ER, endoplasmic reticulum; Gsta1, glutathione S-transferase alpha 1; Gstm3, glutathione S-transferase mu 3; H2AX, H2AX variant histone; Krt7, cytokeratin 7; LCHF, low-carbohydrate, high-fat; Mcp1, monocyte chemoattractant protein-1; Nqo1, NAD(P)H quinone dehydrogenase 1; NRF2, nuclear factor erythroid-derived 2-related factor; OGT, O-GlcNAc transferase; SD, standard diet; SHG, second harmonic generation; SOX9, sex-determining region Y-box 2; TBP, TATA-box binding protein; TNF $\alpha$ , tumour necrosis factor alpha.

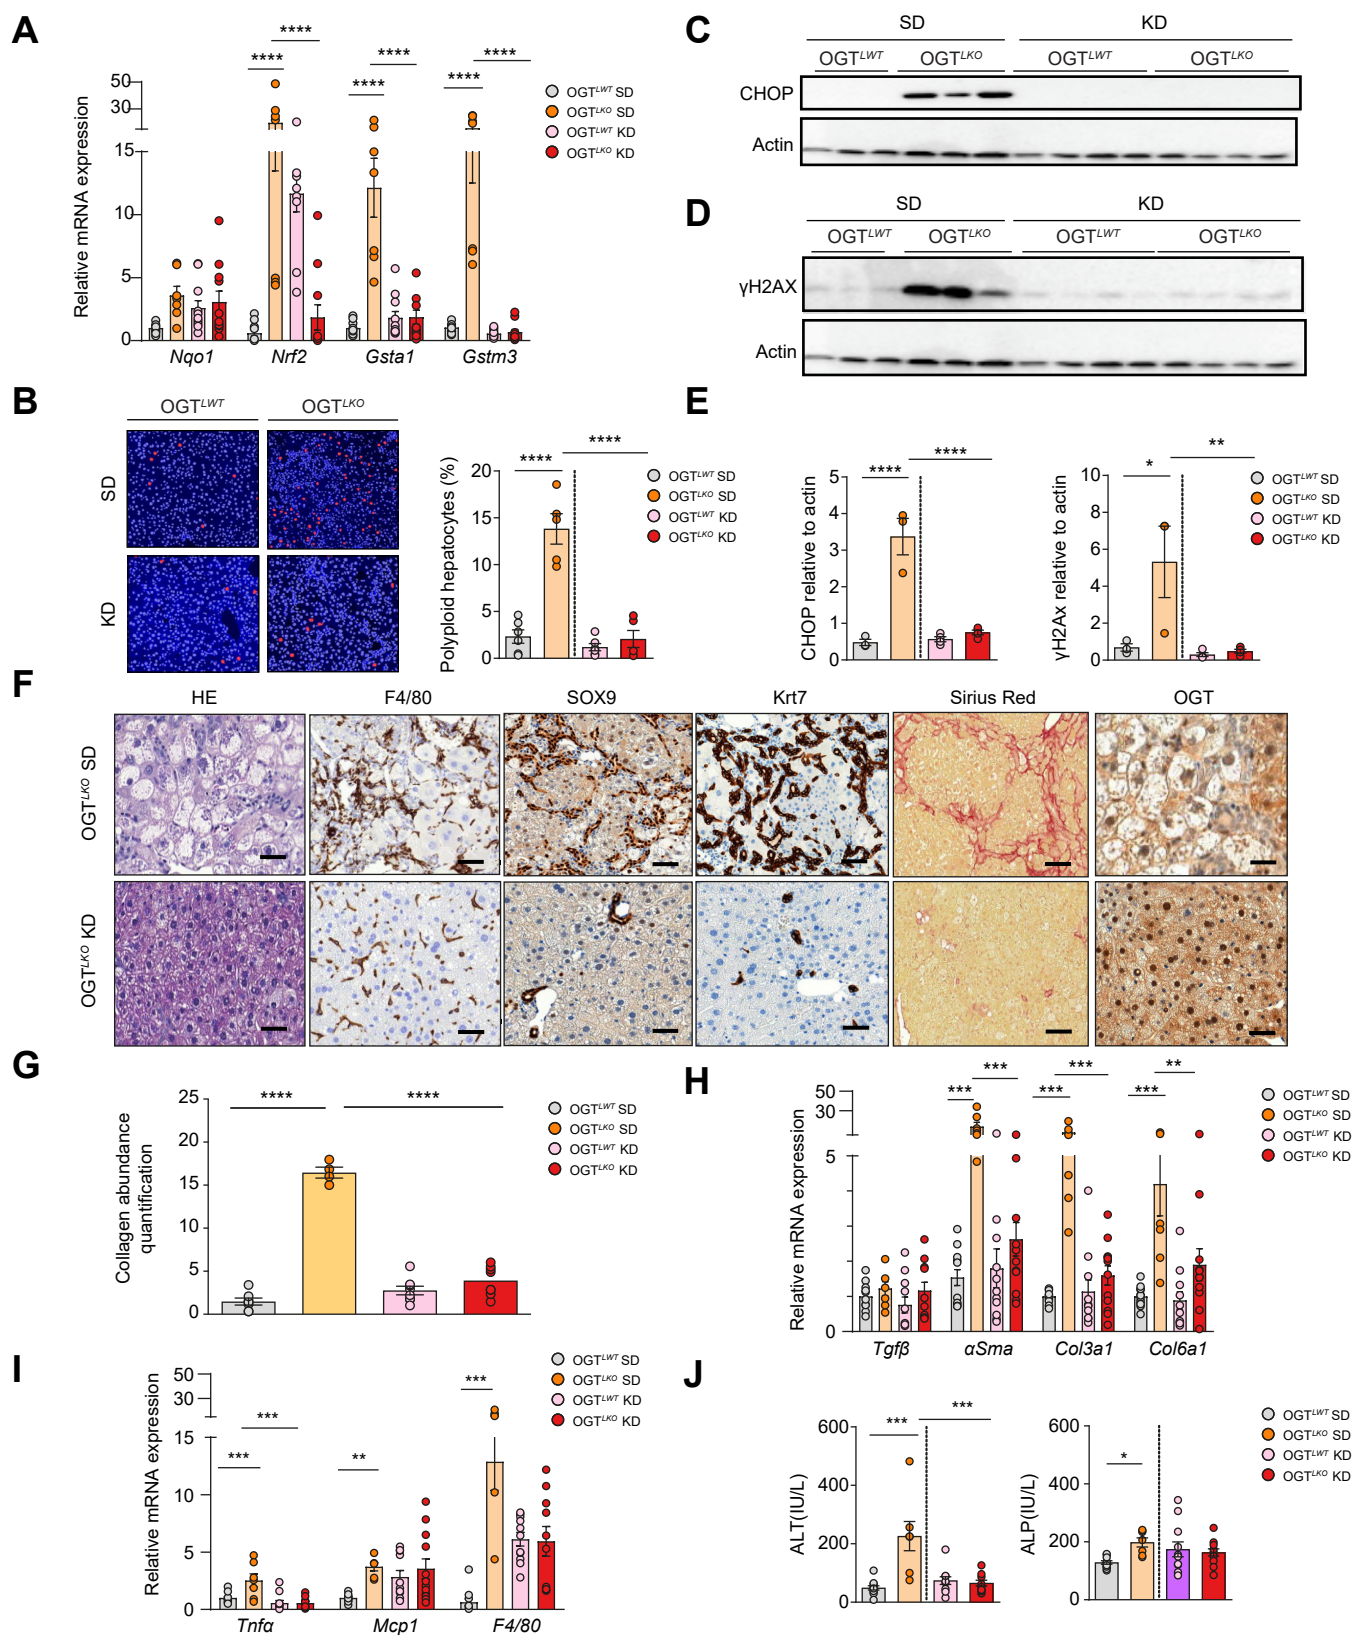

**Fig. 7. KD improves oxidative stress, ER stress, DNA damage, hepatic fibrosis, and liver injury in OGT<sup>LKO</sup> mice.** Liver-specific *Ogt* knockout mice (OGT<sup>LKO</sup>) and control floxed littermates (OGT<sup>LWT</sup>) (males and females) were weaned (at 3 weeks of age) on KD and sacrificed 5 weeks later in the fed state. (A) Relative expression levels of oxidative stress markers normalised to TBP. (B) The proportion of highly polyploid ( $\geq 8n$ ) mononuclear hepatocytes relative to total hepatocytes was quantified in each group. Blue: plasma membrane labelling (KL1). Red: nuclear labelling (Hoechst) (scale bar = 100  $\mu$ m). (C) Western blot analysis of CHOP protein content in livers of OGT<sup>LWT</sup> and OGT<sup>LKO</sup> mice. Three to four representative samples are shown. (D) Western blot analysis of  $\gamma$ H2AX protein content in livers of OGT<sup>LWT</sup>

death (Fig. 4F). Similarly, sensitivity to ER stress-induced apoptosis was also enhanced in OGT<sup>LKO</sup> hepatocytes compared with OGT<sup>LWT</sup> hepatocytes, as illustrated by significantly higher levels of cleaved caspase-3 observed upon thapsigargin treatment (24 h) (Fig. 4G). Altogether, these data demonstrate that OGT deficiency promotes early oxidative and ER stress, leading to DNA damage and increased hepatocyte sensitivity to cell death.

### OGT<sup>LKO</sup> mice display extensive and prolonged hepatic fibrosis in response to early oxidative and ER stress

Aiming at better characterising the phenotype of oxidative and ER stress in the OGT<sup>LKO</sup> mice *in vivo*, we measured oxidative stress markers by qPCR in livers of 4- and 8-week-old OGT<sup>LKO</sup> mice (Fig. 5). These results confirmed a set of genes significantly induced at not only 4 weeks (NAD[P]H quinone dehydrogenase 1 [*Nqo1*], glutathione S-transferase mu 1 [*Gstm1*], glutathione S-transferase mu 3 [*Gstm3*], and glutathione S-transferase alpha 1 [*Gsta1*]) but also 8 weeks in livers of OGT<sup>LKO</sup> mice, although to a lesser extent at 8 weeks than at 4 weeks (Fig. 5A and B). Similar changes were observed at the protein level for mediators of the oxidative/ER stress response (p-62 and CHOP) and DNA damage ( $\gamma$ H2AX) (Fig. 5C and D). To better characterise the phenotype observed in OGT<sup>LKO</sup> mice, we performed kinetic experiments and included an earlier time point (2 weeks) (Fig. S5). The inflammation state occurred as early as 2 weeks after birth, with evidence of increased phosphorylation of JNK in livers of 2-week-old OGT<sup>LKO</sup> mice (Fig. S5A). Of note, mRNA levels of oxidative stress (*Nqo1*, *Gstm1*, and *Gstm3*) and ER stress markers (*Chop*) were significantly increased later on, between 4 and 8 weeks after birth (Fig. S5A and B). However, staining with MDA, a commonly used marker for lipid peroxidation,<sup>25</sup> revealed positive staining on liver sections from 8-week-old OGT<sup>LKO</sup> compared with OGT<sup>LWT</sup> mice, confirming sustained hepatic stress at this stage of development (Fig. 5E). Finally, to better characterise the long-term progression of hepatic damages in OGT<sup>LKO</sup> mice, we followed mice up to 12 months and sacrificed them at specific time points (8 weeks, 12 weeks, and 12 months). Although the expression of oxidative stress and inflammation markers was found increased in livers of OGT<sup>LKO</sup> mice compared with OGT<sup>LWT</sup> mice at 12 weeks, no difference between the two genotypes was observed when the mice were analysed at 12 months (Fig. S6B and Fig. 6D). In contrast, Sirius Red staining revealed marked residual hepatic fibrosis in both 12-week-old and 12-month-old OGT<sup>LKO</sup> mice (Fig. 5F). In agreement, ALT serum levels were significantly increased in 12-week-old and 12-month-old OGT<sup>LKO</sup> mice compared with controls (Fig. S6E). Taken together, these data suggest that inflammation and oxidative stress are early triggering events of the OGT<sup>LKO</sup> phenotype peaking between 2 and 4 weeks, respectively. However, the rest of hepatic alterations of OGT<sup>LKO</sup> mice (namely, fibrosis and liver injury) persisted over time.

### LCHF diet prevents hepatic oxidative stress, ER stress, and DNA damage in OGT<sup>LKO</sup> mice

During the suckling period, pups receive an LCHF diet that switches to a SD containing nearly 70% of carbohydrates at weaning. Because no oxidative stress was observed in livers of 2-week-old OGT<sup>LKO</sup> mice, that is, during the suckling period, we hypothesised that the elevated oxidative stress observed at 4 weeks could result from elevated carbohydrate content in the diet at weaning. Therefore, OGT<sup>LWT</sup> and OGT<sup>LKO</sup> mice were weaned and maintained for 5 weeks on either a SD (69% of carbohydrates, 4% of fat, and 26% of proteins) or an LCHF diet compensated by lipid enhancement (21% of carbohydrates, 60% of fat, and 19% of proteins) (Fig. 6 and Fig. S7A). Induction of oxidative stress markers (*Gsta1* and *Gstm3*) in livers of OGT<sup>LKO</sup> mice compared with OGT<sup>LWT</sup> mice on SD (OGT<sup>LKO</sup> SD vs. OGT<sup>LWT</sup> SD) was significantly reduced when OGT<sup>LKO</sup> mice were fed with LCHF diet (OGT<sup>LKO</sup> LCHF) (Fig. 6A). Interestingly, the expression of ER stress (CHOP) and DNA damage markers ( $\gamma$ H2AX) was also reduced in livers of OGT<sup>LKO</sup> LCHF mice when compared with OGT<sup>LKO</sup> SD (Fig. 6B–D and Fig. S7D). OGT immunostaining revealed significant staining in liver sections from OGT<sup>LKO</sup> mice regardless of the nutritional conditions (Fig. 6E) in agreement with the re-expression observed on SD diet (Fig. 2E and F). Histological analysis of liver ballooning (H&E), inflammation (F4/80), ductular reaction (SOX9, Krt7), and fibrosis (Sirius Red) showed no evidence of improvement upon LCHF conditions (Fig. 6E). Quantification of fibrosis revealed similar hepatic fibrosis in OGT<sup>LKO</sup> mice compared with OGT<sup>LWT</sup> mice under either SD or LCHF diet (Fig. 6F). In agreement, the expression of inflammatory markers (*Tnfa* and *Mcp1*) and fibrosis markers (*Col3a1* and *Col6a1*) was found similarly increased in livers of OGT<sup>LKO</sup> mice compared with OGT<sup>LWT</sup> mice in both nutritional challenges (Fig. 6H and G). Nevertheless, a significant reduction in liver injury marker ALT was observed when OGT<sup>LKO</sup> mice were weaned on an LCHF diet (Fig. 6I), and a tendency towards reduced circulating levels of inflammatory cytokine Cxcl1 was also noted (Fig. S7E). As specific lipids could contribute to oxidative stress and/or ER stress, the hepatic lipidomic profiling (including triglycerides, cholesterol, sphingolipids, and fatty acids) of LCHF diet-fed mice vs. SD-fed mice was performed (Fig. S9A). Lipidomic analysis revealed that the majority of lipid species changes was caused by the dietary change rather than by the genotype (clusters 1, 2, 4, and 5; Fig. S9A). However, clusters 3 and 7 highlighted lipid signatures that were respectively more and less abundant in OGT<sup>LKO</sup> mice fed an LCHF diet compared with SD.

Taken together, these results suggest that although weaning OGT<sup>LKO</sup> mice on an LCHF diet improved some parameters of liver damages (oxidative stress, ER stress, and DNA damage), it failed to fully prevent hepatic alterations, such as ballooning, inflammation, ductular reaction, and fibrosis.

and OGT<sup>LKO</sup> mice. Three to four representative samples are shown. (E) Quantification of CHOP and  $\gamma$ HA2X are shown. Actin was used as a loading control. (F) Liver sections stained with H&E, F4/80, SOX9, Krt7, Sirius Red, and OGT. Scale bars = 100  $\mu$ m. (G) Quantification of fibrosis by SHG microscopy. (H) Relative expression levels of fibrotic markers normalised to TBP. (I) Relative expression levels of inflammatory markers normalised to TBP. (J) Serum levels of ALT and ALP. Data are shown as mean  $\pm$  SEM of four to eight mice (males and females). \**p* < 0.05, \*\**p* < 0.01, \*\*\**p* < 0.001, \*\*\*\**p* < 0.0005 by two-way Anova followed by Bonferroni *post hoc* test.  $\alpha$ SMA, alpha-smooth muscle actin; ALP, alkaline phosphatase; ALT, alanine aminotransferase; CHOP, CCAAT-enhancer-binding protein homologous protein; Col3a1, collagen type III alpha 1 chain; Col6a1, collagen type VI alpha 1 chain; ER, endoplasmic reticulum; *Gsta1*, glutathione S-transferase alpha 1; *Gstm3*, glutathione S-transferase mu 3; H2AX, H2AX variant histone; KD, ketogenic diet; Krt7, cytokeratin 7; *Mcp1*, monocyte chemoattractant protein-1; Nqo1, NAD(P)H quinone dehydrogenase 1; Nrf2, nuclear factor erythroid-derived 2-related factor; OGT, O-GlcNAc transferase; SD, standard diet; SHG, second harmonic generation; SOX9, sex-determining region Y-box 2; TBP, TATA-box binding protein; Tgfb, transforming growth factor beta; Tnfa, tumour necrosis factor alpha.



### KD prevents the hepatic alterations of OGT<sup>LKO</sup> mice

Given that the LCHF diet still contains 21% of carbohydrates, we hypothesised that further decreasing the carbohydrate content in the diet could improve the severe liver damage in OGT<sup>LKO</sup> mice. Therefore, OGT<sup>LWT</sup> and OGT<sup>LKO</sup> mice were challenged at weaning with a KD for 5 weeks (1% of carbohydrates, 94% of fat, and 5% of protein) (Fig. S8A). Significant induction of oxidative stress markers (*Gsta1* and *Gstm3*) in livers of OGT<sup>LKO</sup> mice compared with OGT<sup>LWT</sup> controls on SD (OGT<sup>LKO</sup> SD vs. OGT<sup>LWT</sup> SD) was significantly reduced when OGT<sup>LKO</sup> mice were weaned on a KD (Fig. 7A). Because oxidative stress has been shown to promote hyperpolyploidisation of hepatocytes,<sup>11</sup> we quantified highly polyploid ( $\geq 8n$ ) mononuclear hepatocytes relative to total hepatocytes in each group of mice. Although the number of highly polyploid hepatocytes was significantly increased in livers of OGT<sup>LKO</sup> SD mice when compared with OGT<sup>LWT</sup> SD control (Fig. 7B), no difference was observed between OGT<sup>LKO</sup> and OGT<sup>LWT</sup> mice when fed on KD (Fig. 7B), demonstrating that KD prevents the oxidative stress response upon hepatic OGT deficiency. The expression of ER stress (CHOP) and DNA damage ( $\gamma$ H2AX) markers was also significantly reduced in the liver of OGT<sup>LKO</sup> KD mice when compared with OGT<sup>LKO</sup> SD mice (Fig. 7C–E and Fig. S8D). OGT immunostaining revealed significant staining in liver sections from OGT<sup>LKO</sup> mice regardless of the nutritional conditions (Fig. 7F). Of note, in contrast to the histological observations made on an LCHF diet, liver ballooning (H&E), inflammation (F4/80), ductular reaction (SOX9 and Krt7), and fibrosis (Sirius Red) were markedly improved in OGT<sup>LKO</sup> mice upon KD conditions (Fig. 7F). Quantification of fibrosis accordingly revealed a statistical decrease in hepatic fibrosis in OGT<sup>LKO</sup> KD mice compared with OGT<sup>LKO</sup> SD mice (Fig. 7G). In agreement, the expression of fibrosis markers ( *$\alpha$ Sma*, *Col3a1*, and *Col6a1*) was found similarly decreased in livers of OGT<sup>LKO</sup> KD mice compared with OGT<sup>LKO</sup> SD mice (Fig. 7H). F4/80 staining showed a marked reduction in liver sections from OGT<sup>LKO</sup> KD mice compared with OGT<sup>LKO</sup> SD mice (Fig. 7F). Lastly, a significant difference was observed for liver injury marker ALT when OGT<sup>LKO</sup> mice were weaned on a KD (Fig. 7J). Interestingly, we also observed that specific hepatic lipid species previously associated with liver apoptosis and fibrosis (Cer C24:0 and C24:1)<sup>26,27</sup> were no longer increased when OGT<sup>LKO</sup> mice were weaned on a KD (Fig. S9B). Altogether, these results show that weaning on a KD fully prevented the phenotype of the OGT<sup>LKO</sup> mice (oxidative stress, polyploidy, ER stress, inflammation, fibrosis, and liver injury).

### Discussion

In the liver, O-GlcNAcylation has emerged as an important regulatory mechanism underlying normal liver physiology and metabolic disease.<sup>1</sup> We previously reported that O-GlcNAcylation of two key transcription factors involved in glucose and lipid metabolism (*i.e.* ChREBP and Foxo1) significantly contributes to gluco-lipototoxicity in hepatocytes.<sup>3,4</sup> However, the function of OGT in liver sensing appears rather complex as other studies reported that OGT is rather involved in the survival and death balance in hepatocytes, and also suggested that OGT acts as a critical modulator of hepatocyte homeostasis in the context of liver injury and/or chronic liver diseases.<sup>5,28</sup>

To better understand the importance of O-GlcNAcylation signalling in hepatocytes, we generated mice with a liver-specific

constitutive deletion of OGT (OGT<sup>LKO</sup> mice) and examined their phenotype over a time course ranging from 2 weeks to 1 year upon different dietary challenges. Our specific goal was to address whether the lack of OGT could lead to oxidative stress and associated liver injuries in a diet-dependent manner. We first evaluated glucose homeostasis parameters and observed a significant decrease in fasting blood glucose levels, as well as an improvement in both glucose and pyruvate tolerances when comparing OGT<sup>LKO</sup> with OGT<sup>LWT</sup> mice at 4 weeks of age. In agreement, the expression of gluconeogenic genes was significantly decreased in OGT<sup>LKO</sup> livers. Interestingly, the O-GlcNAcylation of Foxo1, a modification previously shown to regulate its transcriptional activity towards its target gluconeogenic genes,<sup>4,29</sup> was significantly decreased in livers of 4-week-old OGT<sup>LKO</sup> mice compared with OGT<sup>LWT</sup> mice. However, despite improvement in metabolic homeostasis, clear signs of liver injury were already detectable at 4 weeks with a significant increase in proliferation markers, elevated inflammation, and moderate fibrosis, suggesting a critical role for OGT in preventing hepatocyte insult. Indeed, experiments in cultured OGT<sup>LKO</sup> hepatocytes also confirmed oxidative stress, the later evidenced by a significant decrease in the GSH/GSSG ratio, elevated total ROS production, and lipid peroxidation. Follow-up analysis of OGT<sup>LKO</sup> mice demonstrated the development of hepatomegaly, advanced fibrosis, and cholestasis, features that persisted in 1-year-old OGT<sup>LKO</sup> mice and that are usually seen in bile duct ligation models.<sup>30</sup> Importantly, this severe hepatic phenotype was observed in both male and female OGT<sup>LKO</sup> mice, underlining the importance of using both sexes in experimental research to better understand how and why some diseases and conditions affect men and women differently. Interestingly, although recent studies have revealed the existence of sexual dimorphisms in liver diseases, in particular in non-alcoholic fatty liver disease and fibrosis onset,<sup>31,32</sup> we could not see any significant evidence when comparing the phenotype of OGT<sup>LKO</sup> males with that of OGT<sup>LKO</sup> females.

The phenotype of liver OGT deficiency in hepatocytes also led to changes in cell identity profile, probably favouring the differentiation of hepatoblasts to cholangiocytes, typical of the ductular reaction produced in the initial steps of liver regeneration.<sup>33</sup> Interestingly, a higher number of highly polyploid hepatocytes was observed in livers of 8-week-old OGT<sup>LKO</sup> mice. Although polyploidisation can represent a gain of function by contributing to tissue differentiation, we believe that the hyperpolyploidisation observed was caused by extensive cellular stress and can be considered here as a pathological lesion, as previously suggested in other mouse models of hepatic oxidative stress.<sup>34</sup>

A surprising observation was the partial recovery of OGT expression at 8 weeks of age in livers of OGT<sup>LKO</sup> mice. A similar phenomenon, which could be linked to counterselection<sup>19</sup> of OGT-expressing cells, has already been described for other liver-specific gene knockout models.<sup>35–37</sup> Indeed, hepatocytes deficient in OGT may encounter difficulties to survive in an oxidative and inflammatory environment and enter a process of cell death, whereas hepatocytes escaping to the recombination process will repopulate the liver with cells expressing OGT protein. In agreement with this hypothesis, higher sensitivity to cell death inducers was observed in OGT<sup>LKO</sup> hepatocytes compared with OGT<sup>LWT</sup> hepatocytes. This increased susceptibility to cell death

upon defective O-GlcNAcylation is consistent with the significant necroptosis observed following liver OGT deletion<sup>5</sup> and with enhanced necroptosis and apoptosis in livers of OGT-deficient mice after partial hepatectomy.<sup>28</sup> Several other mouse models with liver-specific deficiency in proteins involved in DNA damage (such as damage-specific DNA binding protein 1 [DDB1]),<sup>35</sup> liver regeneration (such as yes-associated protein [YAP]),<sup>36</sup> or epigenetic modulation (such as enhancer of zeste homologue 1 [EZH1]/enhancer of zeste homologue 2 [EZH2])<sup>37</sup> exhibited a phenomenon of cell competition and recovery of expression of the targeted protein. However, the exact number of cells that escape recombination and the mechanisms involved in OGT recovery were not clearly identified in the current study, and further analysis, including single-cell RNA sequencing analysis of OGT<sup>LKO</sup> hepatocytes, will be necessary to investigate these important questions. It should be also mentioned that hepatic recovery of OGT was partial only in some of the groups studied, as observed in livers of female OGT<sup>LKO</sup> mice. The OGT recovery was not previously described in the published model of OGT liver knockout mice,<sup>5</sup> but OGT expression in OGT<sup>LKO</sup> mice was documented only at the age of 4 weeks in this study.

We believe that our study describes here a valuable and timely mouse model of spontaneous fibrosis that may facilitate therapeutic target identification for prevention and treatment of chronic liver disease. Indeed, induction of hepatic fibrosis in rodents requires the use of chemicals or specific diets that, although commonly used, often lack ease of use and appropriate relevance to human liver fibrosis.<sup>38</sup> Although efforts towards providing a better understanding of the mechanisms associated with fibrosis progression and/or regression are being made, no approved drugs are currently available for liver fibrosis *per se*. Interestingly, recent studies have highlighted that intrinsic metabolism of parenchymal cells, immune cells, and/or hepatic stellate cells is important to sustain energetic needs of phenotypic changes in the context of fibrosis.<sup>39</sup> In an attempt to decrease carbohydrate intake in OGT<sup>LKO</sup> mice and to reduce oxidative stress associated with lack of OGT in the liver, we first took the strategy to wean OGT<sup>LKO</sup> mice on an LCHF diet in which the carbohydrate percentage is reduced by over threefold when compared with that in SD (69% of carbohydrates in SD vs. 21% in

LCHF diet). This dietary switch, although improving several parameters including oxidative stress and ER stress, did not correct the other liver alterations such as ballooning, macrophage infiltration, ductular reaction, and fibrosis. However, when carbohydrate concentrations in the diet were further reduced and restricted to 1% in KD, full prevention of oxidative stress, hyperpolyploidy, inflammation, and more importantly fibrosis and liver injury was observed. Of course, in the context of this nutritional switch, a protective role for lipids cannot be excluded, and in fact, the combination of lowering carbohydrate intake and modulating specific lipid species could have been instrumental in the beneficial effects observed. Indeed, lipidomics analysis from LCHF diet and KD experiments revealed that OGT<sup>LKO</sup> mice exhibited high abundance of specific bioactive species including Cer C24:0 and C24:1 under SD conditions, species that remain low upon KD conditions, suggesting that reduction in these Cer moieties could contribute, at least in part, to the protective effect of KD on OGT<sup>LKO</sup> mice. In addition, LCHF diet and KD also differ in their capacity to produce ketone bodies, especially  $\beta$ -hydroxybutyrate (Figs. S7C and S8C), a signalling metabolite with protective properties against oxidative stress.<sup>40</sup> Although ketone body metabolism can induce oxidative stress, it was reported beneficial in the long term because it initiates an adaptive response characterised by the activation of the master regulators of the cell-protective mechanism, including NRF2.<sup>41</sup> This results in resolving oxidative stress, by the upregulation of anti-oxidative and anti-inflammatory activities, improved mitochondrial function, DNA repair, and autophagy. In agreement, studies have hypothesised that activation of ketogenesis in the liver could potentially attenuate ROS-mediated non-alcoholic steatohepatitis progression.<sup>40</sup>

Altogether, our study shows that hepatocyte-specific deletion of OGT leads to severe liver injury, confirming that O-GlcNAcylation and OGT are essential for hepatocyte homeostasis and survival. Our study also validates the OGT<sup>LKO</sup> mouse model as a valuable model for the study of advanced liver fibrosis. Given that the severe fibrosis of OGT<sup>LKO</sup> mice was fully prevented when mice were weaned on a very LCHF diet (*i.e.* KD), our study underlines the potential interest of nutritional intervention as an antifibrogenic strategy.

## Abbreviations

$\alpha$ SMA, alpha-smooth muscle actin; ALP, alkaline phosphatase; ALT, alanine aminotransferase; ARE, antioxidant response element; AST, aspartate aminotransferase; Ccl5, C-C motif chemokine ligand 5; Cer, ceramide; CHOP, CCAAT-enhancer-binding protein homologous protein; Col3a1, collagen type III alpha 1 chain; Col6a1, collagen type VI alpha 1 chain; Cxcl1, C-X-C motif chemokine ligand 1; CycA2, cyclin A2; CycB1, cyclin B1; CycD1, cyclin D1; DDB1, damage-specific DNA binding protein 1; DE, differentially expressed; ER, endoplasmic reticulum; EZH1, enhancer of zeste homologue 1; EZH2, enhancer of zeste homologue 2; FAME, fatty acid methyl ester; FDR, false discovery rate; Foxo1, forkhead box protein  $\alpha$ 1; G6Pase, glucose-6-phosphate dehydrogenase; GAPDH, glyceraldehyde 3-phosphate dehydrogenase; GSH, reduced glutathione; GSSG, oxidised glutathione; Gsta1, glutathione S-transferase alpha 1; Gstm1, glutathione S-transferase mu 1; Gstm3, glutathione S-transferase mu 3; H2AX, H2A histone family member XH2A histone family member X; variant histone, HNF4 $\alpha$ ; hepatocyte nuclear factor 4 alpha, JNK, c-Jun N-terminal kinase, KD; ketogenic diet, Krt7; cytokeratin 7, Krt19; cytokeratin 19, LCHF; low-carbohydrate, high-fat; LDH, lactate

dehydrogenase; Mcp1, monocyte chemoattractant protein-1; MDA, malondialdehyde; MLKL, mixed lineage kinase domain-like pseudokinase; NqO1, NAD(P)H quinone dehydrogenase 1; NRF2, nuclear factor erythroid-derived 2-related factor; OGA, O-GlcNAcase; OGT, O-GlcNAc transferase; PCNA, proliferating cell nuclear antigen; PEPCK, phosphoenolpyruvate carboxykinase; qPCR, quantitative PCR; RIPK3, receptor-interacting serine/threonine-protein kinase 3; RMA, robust multichip algorithm; ROS, reactive oxygen species; SD, standard diet; SHG, second harmonic generation; SM, sphingomyelin; SOX9, sex-determining region Y-box 2; StS, staurosporine; TBP, TATA-box binding protein; TGF $\beta$ , transforming growth factor beta; TNF $\alpha$ , tumour necrosis factor alpha; TUNEL, terminal deoxynucleotidyl transferase dUTP nick end labelling; WGA, wheat germ agglutinin; YAP, yes-associated protein.

## Financial support

PO-P was supported by the European Union's Horizon 2020 Research and Innovation Programme under the Marie Skłodowska-Curie Grant Agreement No. 675610 (current address: Drug Transport and Tumour Metabolism Lab, MRC London Institute of Medical Sciences, London, UK), and

LP was supported by AFEF (Association Française pour l'Etude du Foie) and by INSERM (Poste d'accueil). CP acknowledges the support of grants from the National Agency for Research (ANR) (ANR-20-CE14-0038 IMAGINE, ANR-20-CE14-HEPATOMORPHIC, and ANR RHU QUID NASH).

### Conflicts of interest

The authors declare no conflicts of interest.

Please refer to the accompanying ICMJE disclosure forms for further details.

### Authors' contributions

Performed most the experiments: PO-P, LP. Helped perform the experiments: FB, MR, IC, MM, NP, JM, PP, MC. Performed liver sections and liver immunostaining: RO, MF. Analysed and interpreted the results from the microarray data: PO-P. Prepared the figures and wrote the manuscript: CP, TI, PO-P, LP. Provided scientific advice and critical reading of the manuscript: JG, CD, SG. Conceptualised and supervised the project: CP, TI.

### Data availability statement

Data sharing subject to agreement.

### Acknowledgements

The authors would like to thank Dr. H el ene Gilgenkrantz and Prof. Val erie Paradis (Centre de Recherche sur l'Inflammation [CRI], Universit e Paris Cit e) for helpful discussions. We also would like to thank the Animal Facility from the Institut Cochin Inserm U1016 and, in particular, Mathieu Benard for taking excellent care of the mice. We also thank the Institut Cochin platforms, namely, the Genomic platform (GENOMIC), the Cytometry and Immunobiology platform (CYBIO), the 'Imagerie du vivant platform' (PIV) (Isabelle Lagoutte Franck Lager and Gilles Renault), and the Microscopy Platform (Thomas Guilbert), for fibrosis quantification. Lipidomic profiling was done in MetaToul-Lipidomique Core Facility (I2MC, Inserm 1297, Toulouse, France) from MetaToul (Toulouse metabolomics & fluxomics facilities, [www.metatoul.fr](http://www.metatoul.fr)), which is part of the French National Infrastructure for Metabolomics and Fluxomics MetaboHUB-ANR-11-INBS-0010.

### Supplementary data

Supplementary data associated with this article can be found, in the online version, at <https://doi.org/10.1016/j.jhepr.2023.100878>.

### References

Author names in bold designate shared co-first authorship

- [1] Yang X, Qian K. Protein O-GlcNAcylation: emerging mechanisms and functions. *Nat Rev Mol Cell Biol* 2017;18:452–465.
- [2] Nie H, Yi W. O-GlcNAcylation, a sweet link to the pathology of diseases. *J Zhejiang Univ Sci B* 2019;20:437–448.
- [3] **Guinez C, Filhoulaud G**, Rayah-Benahmed F, Marmier S, C el ine Dubuquoy C, Dentin R, et al. O-GlcNAcylation increases ChREBP protein content and transcriptional activity in the liver. *Diabetes* 2011;60:1399–1413.
- [4] Kuo M, Zilberfarb V, Gangneux N, Christeff N, Issad T. O-glycosylation of FoxO1 increases its transcriptional activity towards the glucose 6-phosphatase gene. *FEBS Lett* 2008;582:829–834.
- [5] Zhang B, Li MD, Yin R, Liu Y, Yang Y, Mitchell-Richards KA, et al. O-GlcNAc transferase suppresses necroptosis and liver fibrosis. *JCI Insight* 2019;4:e127709.
- [6] Du D, Shi YH, Le GW. Oxidative stress induced by high-glucose diet in liver of C57BL/6J mice and its underlying mechanism. *Mol Biol Rep* 2010;37:3833–3839.
- [7] Mohanty P, Hamouda W, Garg R, Aljada A, Ghanim H, Dandona P. Glucose challenge stimulates reactive oxygen species (ROS) generation by leucocytes. *J Clin Endocrinol Metab* 2000;85:2970–2973.
- [8] de Carvalho Vidigal F, Guedes Cocate P, Gonalves Pereira L, de C assia Gonalves Alfenas R. The role of hyperglycemia in the induction of oxidative stress and inflammatory process. *Nutr Hosp* 2012;27:1391–1398.
- [9] Dickinson S, Hancock DP, Petocz P, Ceriello A, Brand-Miller J. High-glycemic index carbohydrate increases nuclear factor- B activation in mononuclear cells of young, lean healthy subjects. *Am J Clin Nutr* 2008;87:1188–1193.
- [10] Chen PH, Chi JT, Boyce M. Functional crosstalk among oxidative stress and O-GlcNAc signaling pathways. *Glycobiology* 2018;28:556–564.
- [11] Gentric G, Maillet V, Paradis V, Couton D, L'Hermitte A, Panasyuk G, et al. Oxidative stress promotes pathologic polyploidization in nonalcoholic fatty liver disease. *J Clin Invest* 2015;125:981–992.
- [12] Bligh EG, Dyer WJ. A rapid method of total lipid extraction and purification. *Can J Biochem Physiol* 1959;37:911–917.
- [13] Oliveros JC, Venny. An interactive tool for comparing lists with Venn's diagrams. 2007. 2015; <https://bioinfogp.cnb.csic.es/tools/venny/index.html>. [Accessed 13 October 2023].
- [14] Blighe K, Rana S, Lewis M. EnhancedVolcano: publication-ready volcano plots with enhanced colouring and labeling. 2019; <https://github.com/kevinblighe/EnhancedVolcano>. [Accessed 13 October 2023].
- [15] Kolde R. Pheatmap: pretty heatmaps R package version 1.0.12. 2019; <https://CRAN.R-project.org/package=pheatmap>. [Accessed 13 October 2023].
- [16] Wang XJ, Hayes JD, Wolf CR. Generation of a stable antioxidant response element-driven reporter gene cell line and its use to show redox-dependent activation of Nrf2 by cancer chemotherapeutic agents. *Cancer Res* 2006;66:10983–10994.
- [17] Guilbert T, Odin C, Le Grand Y, Gailhouse L, Turlin B, Ezan F, et al. A robust collagen scoring method for human liver fibrosis by second harmonic microscopy. *Opt Express* 2010;18:25794–25807.
- [18] Park SK, Zhou X, Pendleton KE, Hunter OV, Kohler JJ, "Donnell KA, et al. A conserved splicing silencer dynamically regulates O-GlcNAc transferase intron retention and O-GlcNAc homeostasis. *Cell Rep* 2017;20:1088–1099.
- [19] Baker NE. Emerging mechanisms of cell competition. *Nat Rev Genet* 2020;21:683–697.
- [20] Aquilano K, Baldelli S, Ciriolo MR. Glutathione: new roles in redox signaling for an old antioxidant. *Front Pharmacol* 2014;5:196.
- [21] Kalthoff S, Ehmer U, Freiberg N, Manns MP, Strassburg CP. Interaction between oxidative stress sensor Nrf2 and xenobiotic-activated aryl hydrocarbon receptor in the regulation of the human phase II detoxifying UDP-glucuronosyltransferase 1A10. *J Biol Chem* 2010;285:5993–6002.
- [22] **Cho CS, Park HW**, Ho A, Semple IA, Kim B, Jang I, et al. Lipotoxicity induces hepatic protein inclusions through TANK binding kinase 1-mediated p62/sequestosome 1 phosphorylation. *Hepatology* 2018;68:1331–1346.
- [23] Manley S, Williams JA, Ding WX. Role of p62/SQSTM1 in liver physiology and pathogenesis. *Exp Biol Med (Maywood)* 2013;238:525–538.
- [24] Belmokhtar CA, Hillion J, S egal-Bendirdjian E. Staurosporine induces apoptosis through both caspase-dependent and caspase-independent mechanisms. *Oncogene* 2001;20:3354–3362.
- [25] Paradis V, Kollinger M, Fabre M, Holstege A, Poynard T, Bedossa P. *In situ* detection of lipid peroxidation by-products in chronic liver diseases. *Hepatology* 1997;26:135–142.
- [26] Shmarakov IO, Jiang H, Liu J, Fernandez EJ, Blaner WS. Hepatic stellate cell activation: a source for bioactive lipids. *Biochim Biophys Acta Mol Cell Biol Lipids* 2019;1864:629–642.
- [27] Pewzner-Jung Y, Park H, Laviad EL, Silva LC, Lahiri S, Stiban J, et al. A critical role for ceramide synthase 2 in liver homeostasis: I. alterations in lipid metabolic pathways. *J Biol Chem* 201;285:10902–10.
- [28] Roberts DR, McGreal SR, Umbaugh DS, Parkes WS, Kotulkar M, Abernathy S, et al. Regulation of liver regeneration by hepatocyte O-GlcNAcylation in mice. *Cell Mol Gastroenterol Hepatol* 2022;13:1510–1529.
- [29] Housley MP, Rodgers JT, Udeshi ND, Kelly TJ, Shabanowitz J, Hunt DF, et al. O-GlcNAc regulates FoxO activation in response to glucose. *J Biol Chem* 2008;283:16283–16292.
- [30] **Geerts AM, Vanheule E**, Praet M, Van Vlierberghe H, De Vos M, Colle I. Comparison of three research models of portal hypertension in mice: macroscopic, histological and portal pressure evaluation. *Int J Exp Pathol* 2008;89:251–263.
- [31] Lefebvre P, Staels B. Hepatic sexual dimorphism – implications for non-alcoholic fatty liver disease. *Nat Rev Endocrinol* 2021;17:662–670.
- [32] Smati S, Phezzi A, Fougerat A, Ellero-Simatos S, Blum Y, Lippi Y, et al. Integrative study of diet-induced mouse models of NAFLD identifies PPAR  as a sexually dimorphic drug target. *Gut* 2022;71:807–821.
- [33] Roskams TA, Theise ND, Balabaud C, Bhagat G, Bhathal PS, Bioulac-Sage, et al. Nomenclature of the finer branches of the biliary tree: canals, ductules, and ductular reactions in human livers. *Hepatology* 2004;39:1739–1745.



- [34] **Donne R, Saroul-Ainama M, Cordier P**, Celton-Morizur S, Desdouets C. Polyploidy in liver development, homeostasis and disease. *Nat Rev Gastroenterol Hepatol* 2020;17:391–405.
- [35] Yamaji S, Zhang M, Zhang J, Endo Y, Bibikova E, Goff SP, et al. Hepatocyte-specific deletion of DDB1 induces liver regeneration and tumorigenesis. *Proc Natl Acad Sci USA* 2010;107:22237–22242.
- [36] **Zhang N, Bai H**, David KK, Dong J, Zheng Y, Cai J, et al. The Merlin/NF2 tumor suppressor functions through the YAP oncoprotein to regulate tissue homeostasis in mammals. *Dev Cell* 2010;19:27–38.
- [37] Grindheim JM, Nicetto D, Donahue G, Zaret KS. Polycomb repressive complex 2 proteins EZH1 and EZH2 regulate timing of postnatal hepatocyte maturation and Fibrosis by repressing genes with euchromatic promoters in mice. *Gastroenterology* 2019;156:1834–1848.
- [38] **Yanguas SC, Cogliati B**, Willebrords J, Maes M, Colle I, van den Bossche B, et al. Experimental models of liver fibrosis. *Arch Toxicol* 2016;90:1025–1048.
- [39] Gilgenkrantz H, Mallat A, Moreau R, Lotersztajn S. Targeting cell-intrinsic metabolism for antifibrotic therapy. *J Hepatol* 2021;74:1442–1454.
- [40] Rojas-Morales P, Pedraza-Chaverri J, Tapia E. Ketone bodies, stress response, and redox homeostasis. *Redox Biol* 2020;29:101395.
- [41] Kolb H, Kempf K, Röhling M, Lenzen-Schulte M, Schloot NC, Martin S. Ketone bodies: from enemy to friend and guardian angel. *BMC Med* 2021;19:313.

Journal of Hepatology, Volume 6

## Supplemental information

### **O-GlcNAc transferase acts as a critical nutritional node for the control of liver homeostasis**

**Paula Ortega-Prieto, Lucia Parlati, Fadila Benhamed, Marion Regnier, Isadora Cavalcante, Mélanie Montabord, Rachel Onifarasoaniaina, Maryline Favier, Natasa Pavlovic, Julie Magusto, Michèle Cauzac, Patrick Pagesy, Jérémie Gautheron, Chantal Desdouets, Sandra Guilmeau, Tarik Issad, and Catherine Postic**

# **O-GlcNAc transferase acts as a critical nutritional node for the control of liver homeostasis**

Paula Ortega-Prieto, Lucia Parlati, Fadila Benhamed, Marion Regnier, Isadora Cavalcante, Mélanie Montabord, Rachel Onifarasoaniaina, Maryline Favier, Natasa Pavlovic, Julie Magusto, Michèle Cauzac, Patrick Pagesy, Jérémie Gautheron, Chantal Desdouets, Sandra Guilmeau, Tarik Issad, Catherine Postic

## Table of contents

|                                   |    |
|-----------------------------------|----|
| Supplementary figure legends..... | 2  |
| Supplementary table legends.....  | 6  |
| Supplementary figures.....        | 7  |
| Supplementary tables.....         | 16 |



## Supplementary figure legends

21 **Fig. S1. Physiological parameters in 4 week-old OGT<sup>LWT</sup> and OGT<sup>LKO</sup> mice.** Male liver-  
22 specific *Ogt* knockout (OGT<sup>LKO</sup>) and control floxed littermates (OGT<sup>LWT</sup>) mice were studied 4  
23 weeks after birth. **A.** Fasting blood glucose (5 hours) (mmol/L). **B.** Glucose tolerance test. The  
24 area under the curve (AUC) is shown. **C.** Pyruvate tolerance test. The area under the curve  
25 (AUC) is shown. **D.** Insulin tolerance test. The area under the curve (AUC) is shown. **E.**  
26 Western blot analysis of Foxo1 (whole lysate), Foxo1O-GlcNAcylation levels (WGA) and  
27 global O-GlcNAcylation in liver of OGT<sup>LWT</sup> and OGT<sup>LKO</sup> mice. Actin was used as loading  
28 control. Three representative samples are presented per condition. **F.** Relative expression levels  
29 of gluconeogenic genes normalized to TBP. Data are shown as Mean  $\pm$  SEM of 6-8 male mice.  
30 \*P < 0.05; \*\*P < 0.01; \*\*\*P < 0.001 by unpaired Student t-test (Mann-Whitney U test).

31  
32 **Fig. S2. Liver injury and cell identity assessment in OGT<sup>LKO</sup> mice.** Male liver-specific  
33 *Ogt* knockout (OGT<sup>LKO</sup>) and control floxed littermates (OGT<sup>LWT</sup>) mice were studied 8 weeks  
34 after birth in the fed state. **A.** Relative expression of *Oga* normalized to TBP **B.** Relative  
35 expression levels of proliferation markers normalized to TBP. **C.** Western blot analysis of  
36 proliferation markers. Three representative samples are shown. Actin was used as a loading  
37 control. **D.** Liver section of mice without macroscopic nodular phenotype stained with HE,  
38 Sirius red and OGT. **E.** Serum levels of aspartate aminotransferase (AST), total and direct  
39 bilirubin and alkaline phosphatase (ALP) in mice 8 weeks after birth. **F.** Representation of  
40 hepatoblast differentiation into hepatocytes or cholangiocytes. Markers used for cell  
41 characterization are represented under each cellular type. **G.** Relative expression of cell identity  
42 markers in livers from OGT<sup>LWT</sup> compared to OGT<sup>LKO</sup> mice at 4 and 8 weeks. TBP was used as  
43 a housekeeping gene. **H.** Liver sections of 8 week-old mice stained with HNF4 $\alpha$ , SOX9 and

44 Krt19 antibodies. Scale bars = 100  $\mu$ m on the two upper sections. Detailed zoom is shown in  
45 the bottom sections with a scale bar = 50 $\mu$ m. PV: Portal vein. CV: Central vein. Data are  
46 represented as Mean  $\pm$  SEM of 8-10 mice at 4 weeks and 13-15 mice at 8 weeks. \*\*P < 0.01;  
47 \*\*\*P < 0.001 by unpaired Student t-test (Mann-Whitney U test) comparing OGT<sup>LWT</sup> and OGT<sup>LKO</sup> at  
48 the same age (Panels A, B, E). \*\*P < 0.01; \*\*\*P < 0.001 by two-way ANOVA followed by Bonferroni  
post hoc test (panel G).

49

50 **Fig. S3. Female OGT<sup>LKO</sup> mice exhibit severe liver damage.**

51 Female liver-specific *Ogt* knockout (OGT<sup>LKO</sup>) and control floxed littermates (OGT<sup>LWT</sup>) mice  
52 were studied 8 weeks after birth in the fed state. **A.** Fed blood glucose (mmol/L), body (g), liver  
53 and spleen weights are shown. Liver and spleen weight are represented as percentage of body  
54 weight. **B.** Relative expression levels of *Ogt* normalized to TBP. **C.** Western blot analysis of  
55 OGT and CHOP protein content in liver of OGT<sup>LWT</sup> and OGT<sup>LKO</sup> mice. Four representative  
56 samples are shown. Actin was used as a loading control. **D.** Liver sections stained with  
57 hematoxylin-eosin (HE), Sirius red,  $\alpha$ SMA, OGT, Ki67 and SOX9. Scale bars = 100  $\mu$ m. **E.**  
58 Relative expression levels of inflammatory markers normalized to TBP. **F.** Relative expression  
59 levels of fibrosis markers normalized to TBP. **G.** Relative expression levels of oxidative stress  
60 markers normalized to TBP. **H.** Serum levels of alanine aminotransferase (ALT). Data are  
61 shown as Mean  $\pm$  SEM of 5 female mice per condition. \*P < 0.05; \*\*P < 0.01; \*\*\*P < 0.001;  
62 \*\*\*\*P < 0.0005 by unpaired Student t-test (Mann-Whitney U test).

63

64 **Fig. S4. Heatmaps of oxidative stress, necroptosis, DNA repair and extracellular matrix.**

65 **A.** Microarray results of genes involved in oxidative stress. **B.** Microarray results of genes  
66 involved in necroptosis. **C.** Microarray results of genes involved in DNA repair. **D.** Microarray  
67 results of significant changing genes involved in extracellular matrix formation. Genes found  
68 significantly different (either down or up-regulated) between OGT<sup>LWT</sup> and OGT<sup>LKO</sup> are

69 indicated by an asterisk (\*). Differentially expressed (DE) gene cut-off was set for a fold change  
70  $\geq |2|$  and False discovery rate (FDR) p-value  $< 0.05$ .

71  
72 **Fig. S5. Kinetics of inflammation, oxidative stress and ER stress markers in liver of**  
73 **OGT<sup>LWT</sup> and OGT<sup>LKO</sup> mice.** Male liver-specific *Ogt* knockout (OGT<sup>LKO</sup>) and control floxed  
74 littermates (OGT<sup>LWT</sup>) mice were studied 2, 4 or 8 weeks after birth in the fed state. **A.** Western  
75 blots showing protein content in whole liver lysates of inflammation (Phospho-JNK and total  
76 JNK), ER stress (CHOP) markers. Actin and/or HSP90 were used as loading controls. **B.**  
77 Relative expression levels of oxidative stress markers and of *Chop* normalized to TBP. Data  
78 are represented as Mean  $\pm$  SEM of 6 mice per group age. \*P  $< 0.05$ ; \*\*\*P  $< 0.001$ ; \*\*\*\*P  $<$   
79 0.0005 by two-way Anova followed by Bonferroni post hoc test.

80  
81 **Fig. S6. Persistent fibrosis and liver injury in 12 weeks and 12 months old OGT<sup>LKO</sup>**  
82 **mice.** Liver-specific *Ogt* knockout (OGT<sup>LKO</sup>) and control floxed littermates (OGT<sup>LWT</sup>) mice  
83 were studied 12 weeks and 12 months after birth in the fed state. **A.** Liver and spleen weights  
84 are shown and are represented as percentage of body weight. **B.** Relative expression levels of  
85 oxidative stress and inflammatory markers normalized to TBP. **C.** Liver sections stained with  
86 hematoxylin-eosin (HE) and F4/80. Scale bars = 100  $\mu\text{m}$ . **D.** Serum levels of alanine  
87 aminotransferase (ALT) of alkaline phosphatase (ALP) and lactate dehydrogenase (LDH). Data  
88 are shown as Mean  $\pm$  SEM of 18-20 individual male and female mice at 12 weeks and 12  
89 months. \*P  $< 0.05$ ; \*\*P  $< 0.01$ ; \*\*\*P  $< 0.001$  and \*\*\*\*P  $< 0.0005$  by two-way ANOVA followed by  
Bonferroni post hoc test.

90  
91  
92 **Fig. S7. Low carbohydrate high fat (LCHF) diet improves oxidative stress, ER stress**  
93 **and DNA damage but not fibrosis in OGT<sup>LKO</sup> mice.** **A.** Liver-specific *Ogt* knockout



94 (OGT<sup>LKO</sup>) and control floxed littermates (OGT<sup>LWT</sup>) mice were weaned (at 3 weeks of age) on a  
95 low carbohydrate high fat (LCHF in % of calories: 21% of carbohydrates, 60% of fat, 19% of  
96 proteins) diet and sacrificed 5 weeks later in the fed state. **B.** Body weight (g), liver and spleen  
97 weights are shown. Liver and spleen weights are represented as percentage of body weight. **C.**  
98 Serum concentrations of  $\beta$ -hydroxybutyrate. **D.** Relative expression levels of *Chop* normalized  
99 to TBP. **E.** Serum levels of Cxcl1. Data are shown as Mean  $\pm$  SEM of 4-12 mice (males and  
100 females). \*P < 0.05; \*\*\*P < 0.001; \*\*\*\*P < 0.0005 by two-way ANOVA followed by Bonferroni post  
101 hoc test.

102 **Fig. S8. Ketogenic diet (KD) improves oxidative stress, ER stress, DNA damage,**  
103 **hepatic fibrosis and liver injury in OGT<sup>LKO</sup> mice.** **A.** Liver-specific *Ogt* knockout (OGT<sup>LKO</sup>)  
104 and control floxed littermates (OGT<sup>LWT</sup>) were weaned (at 3 weeks of age) on a ketogenic diet  
105 (KD: 1% of carbohydrates, 94% of fat, 5% of protein) and sacrificed 5 weeks later in the fed  
106 state. **B.** Body weight (g), liver and spleen weights are shown. Liver and spleen weights are  
107 represented as percentage of body weight. **C.** Serum concentrations of  $\beta$ -hydroxybutyrate. **D.**  
108 Relative expression levels of *Chop* normalized to TBP. Data are shown as Mean  $\pm$  SEM of 4-8  
109 mice (males and females). \*\*\*P < 0.001; \*\*\*\*P < 0.0005 by two-way ANOVA followed by  
Bonferroni post hoc test.

110

111

112 **Fig. S9. Lipidomic analysis in liver of OGT<sup>LWT</sup> and OGT<sup>LKO</sup> mice fed on SD, LCHF or**  
113 **KD diets.** **A.** Heat map of lipid species in liver from OGT<sup>LWT</sup> and OGT<sup>LKO</sup> mice fed at weaning  
114 for 5 weeks with a LCHF diet. Specific clusters are indicated. **B.** Heat map of lipid species in  
115 liver from OGT<sup>LWT</sup> and OGT<sup>LKO</sup> fed for 5 weeks at weaning with a KD diet. Specific clusters  
116 are indicated. Data are shown as Mean  $\pm$  SEM of 4-12 mice (males and females).

117

118

## Supplementary table legends

119 **Table S1. Differentially expressed genes at 4 weeks**

120 **Table S2. Differentially expressed genes at 8 weeks**

121 **Table S3. Differentially expressed genes common to 4 and 8 weeks**

123 **Table S4. List of primers used for qPCR**

124

125

126

127

128

129

130

Supplementary figures

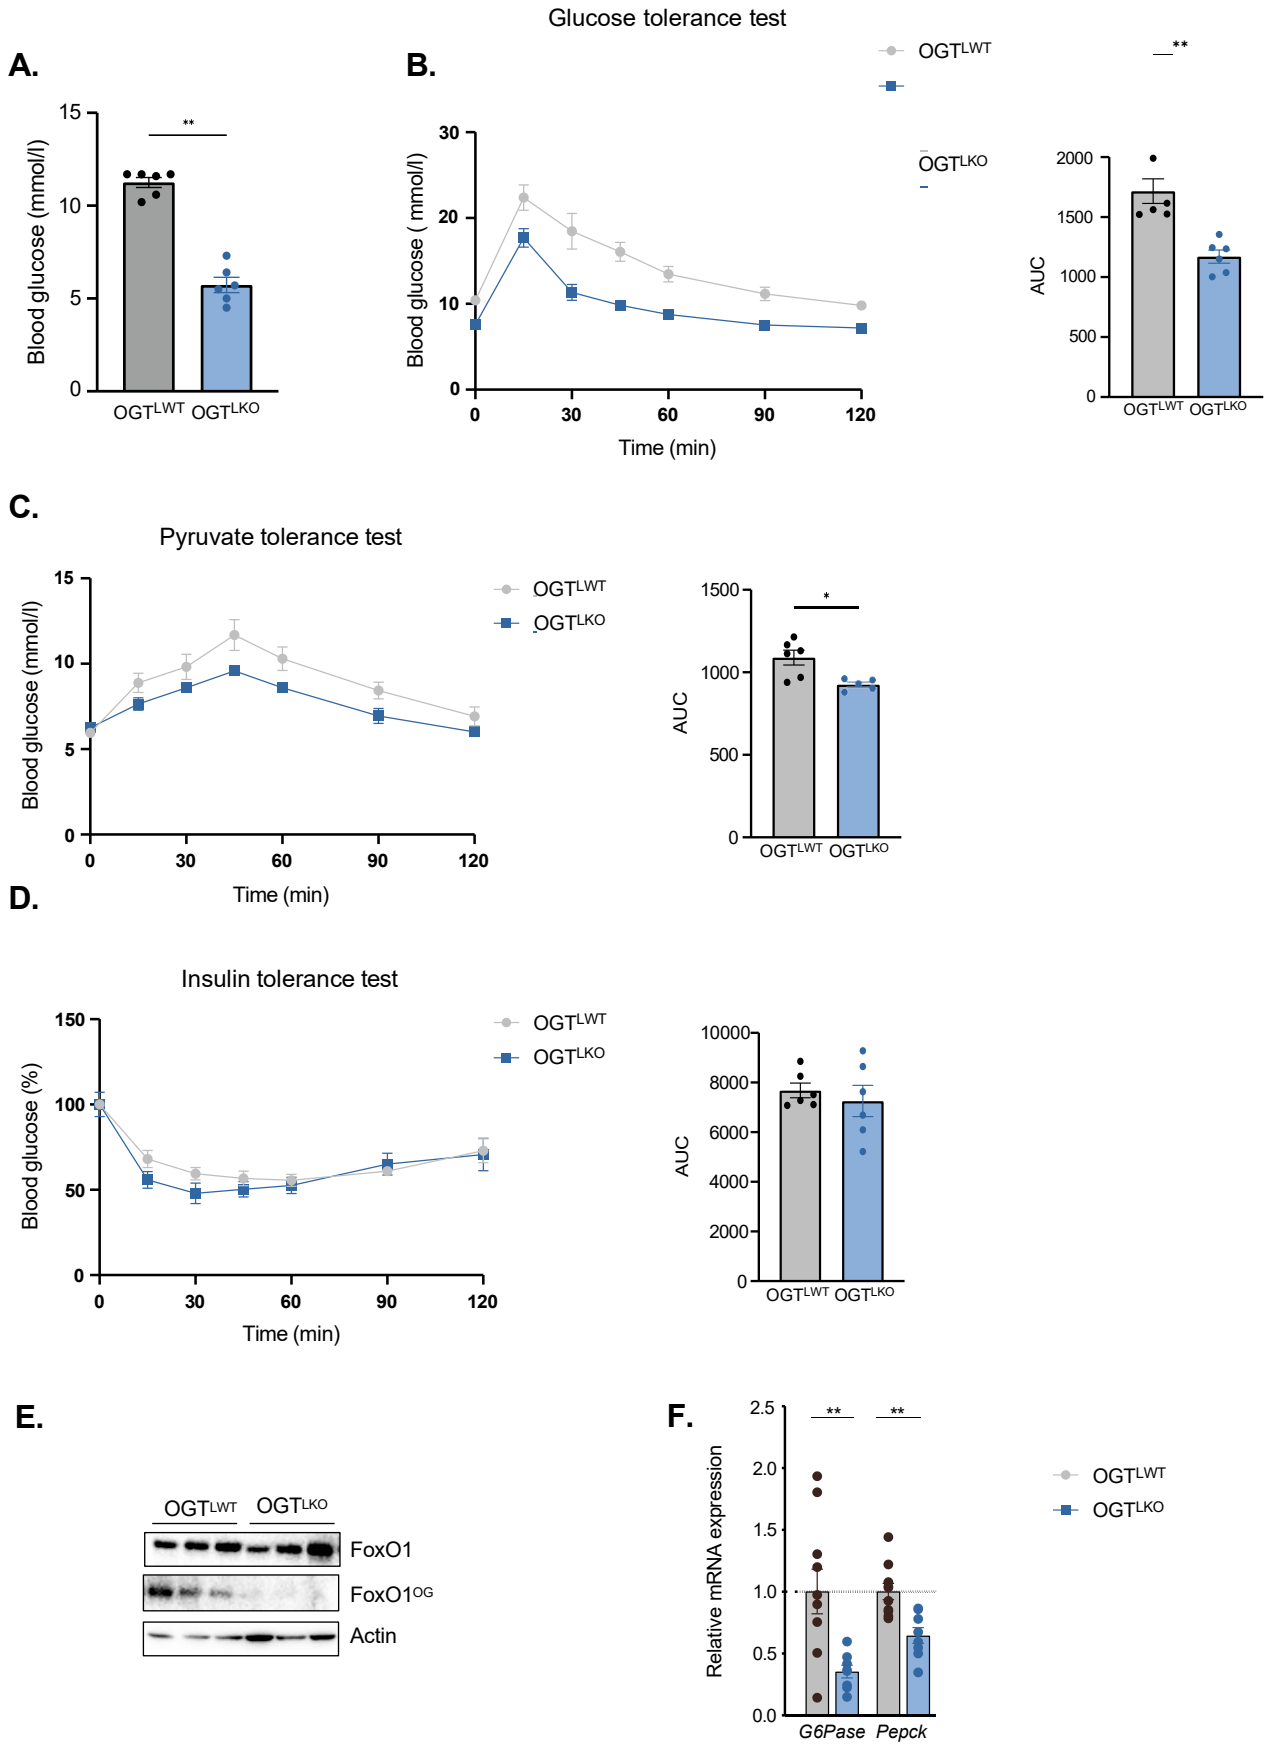

Fig. S1



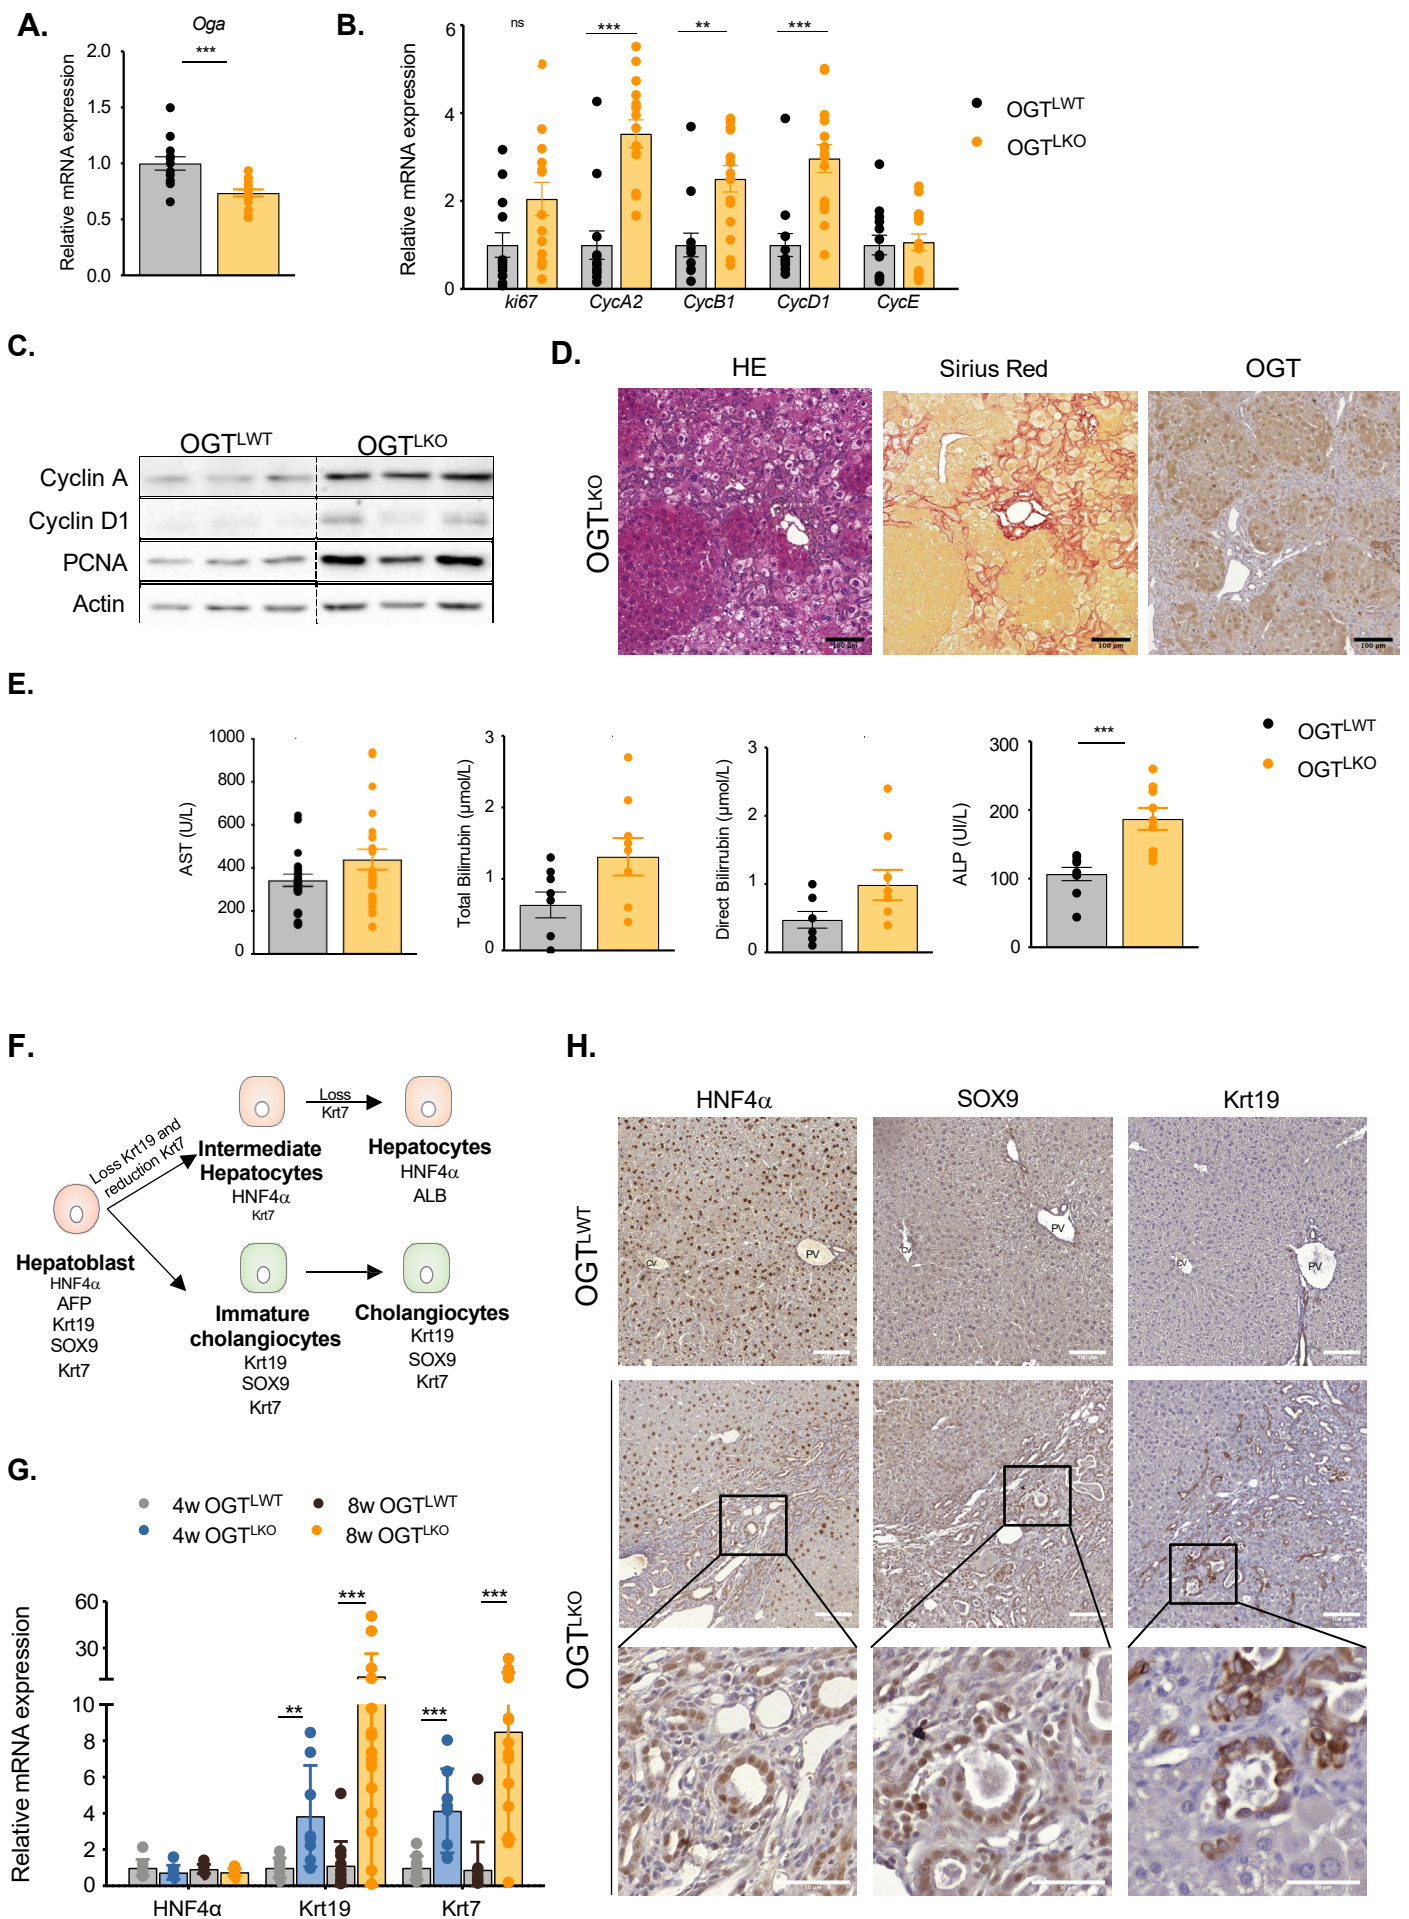

Fig. S2

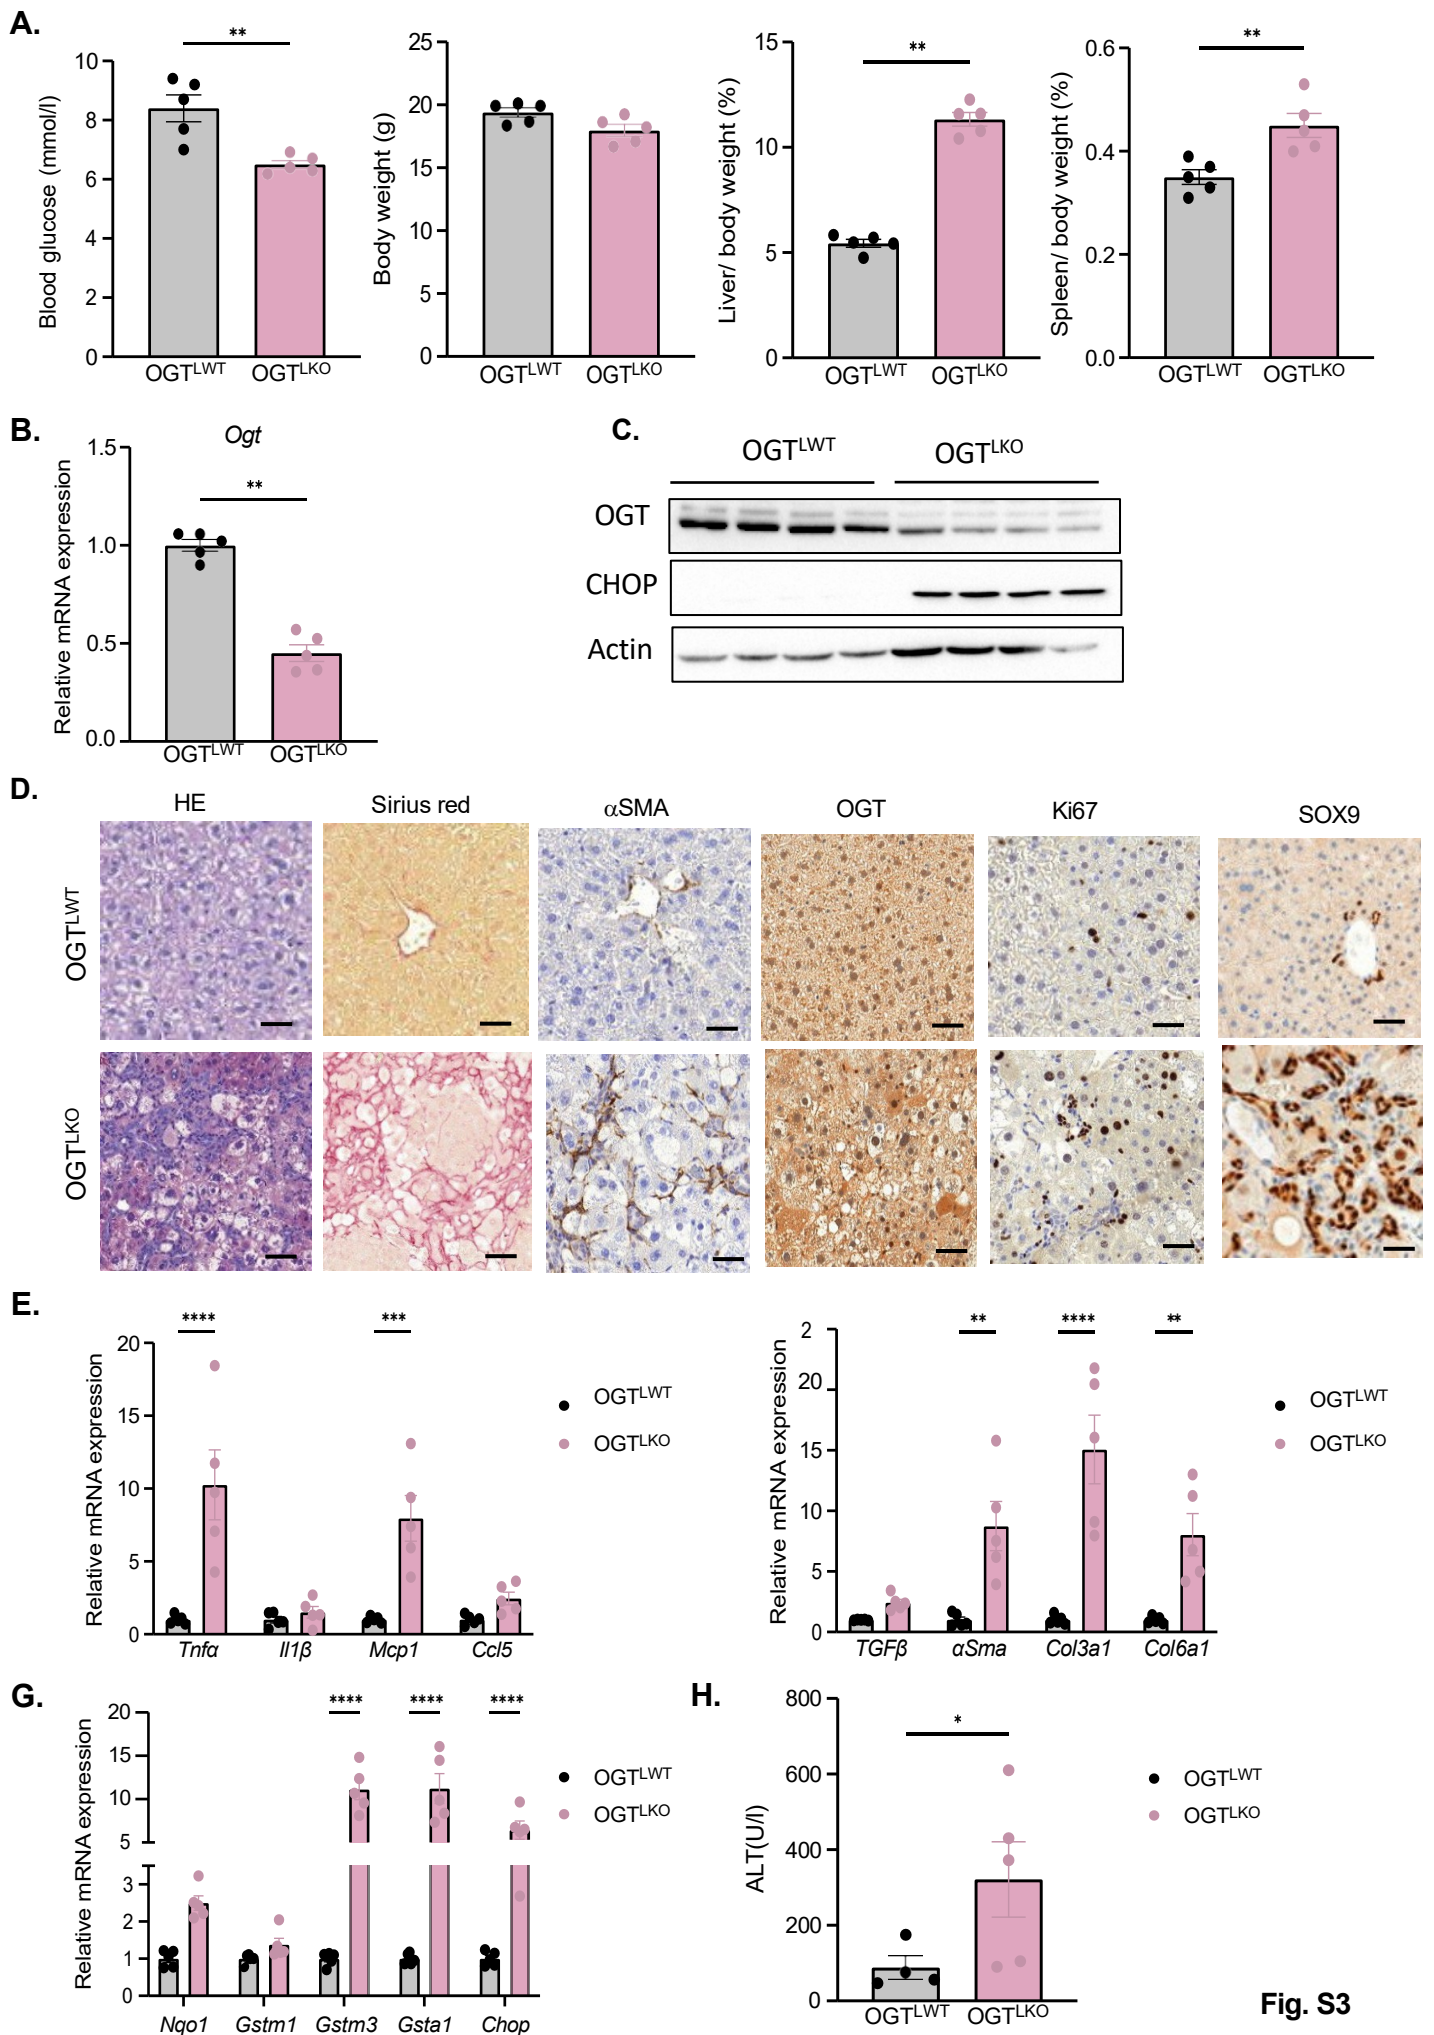

**Fig. S3**

### A. Oxidative stress

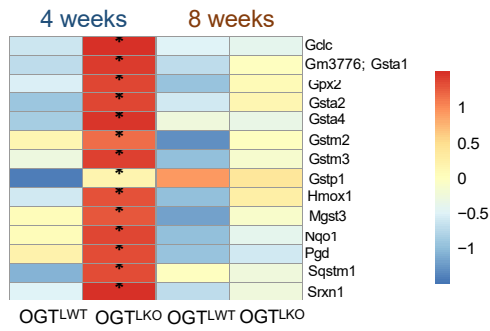

### B. Necroptosis

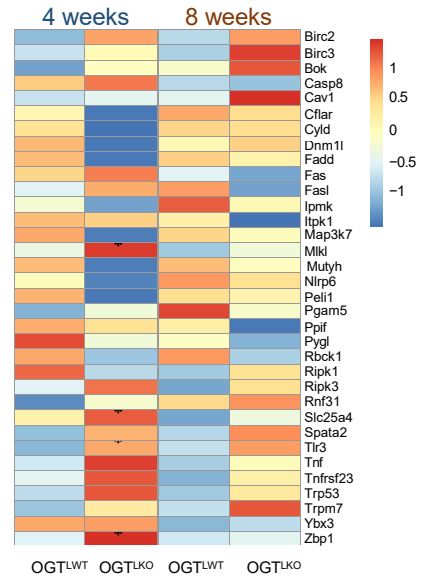

### C. DNA repair

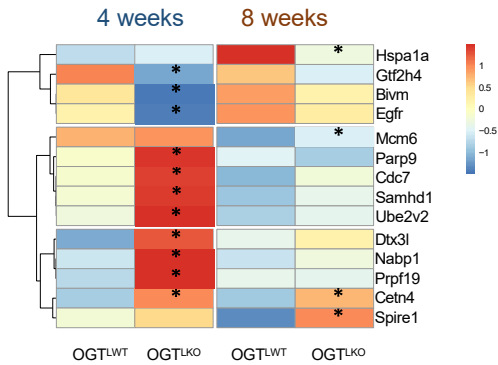

### D. Extracellular matrix

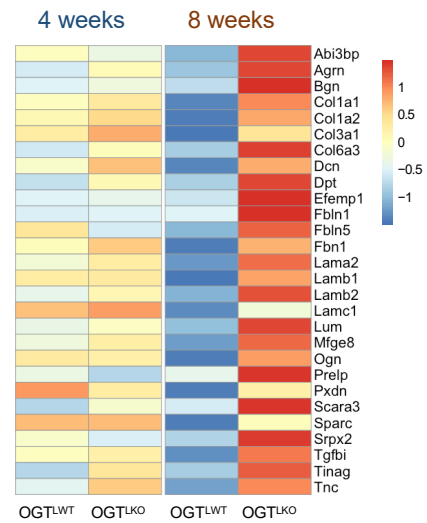

**A.**

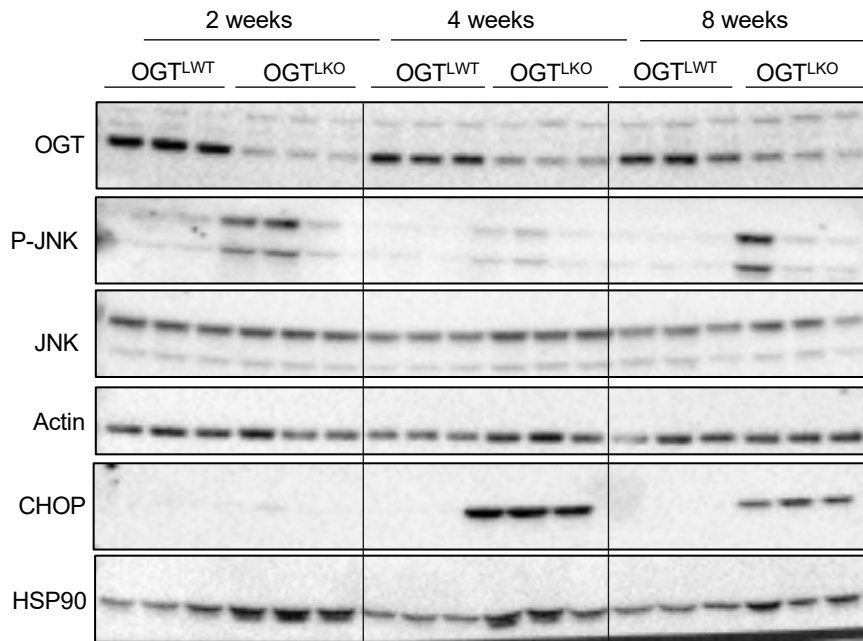

**B.**

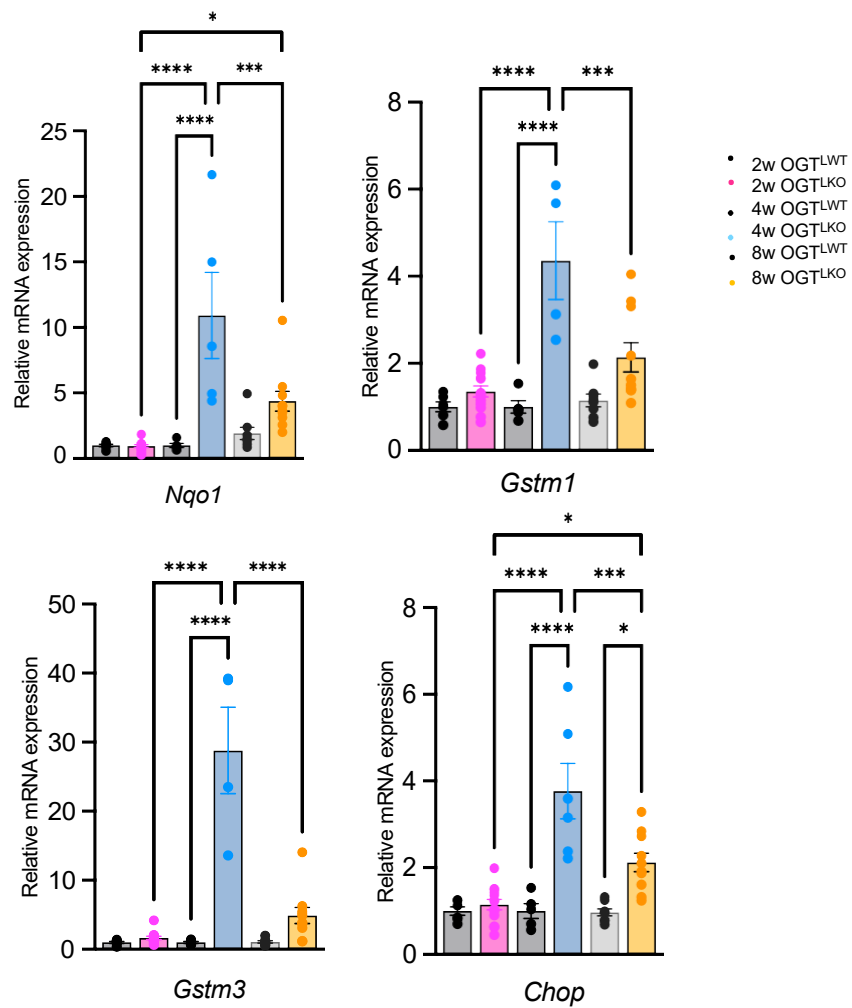

**Fig. S5**



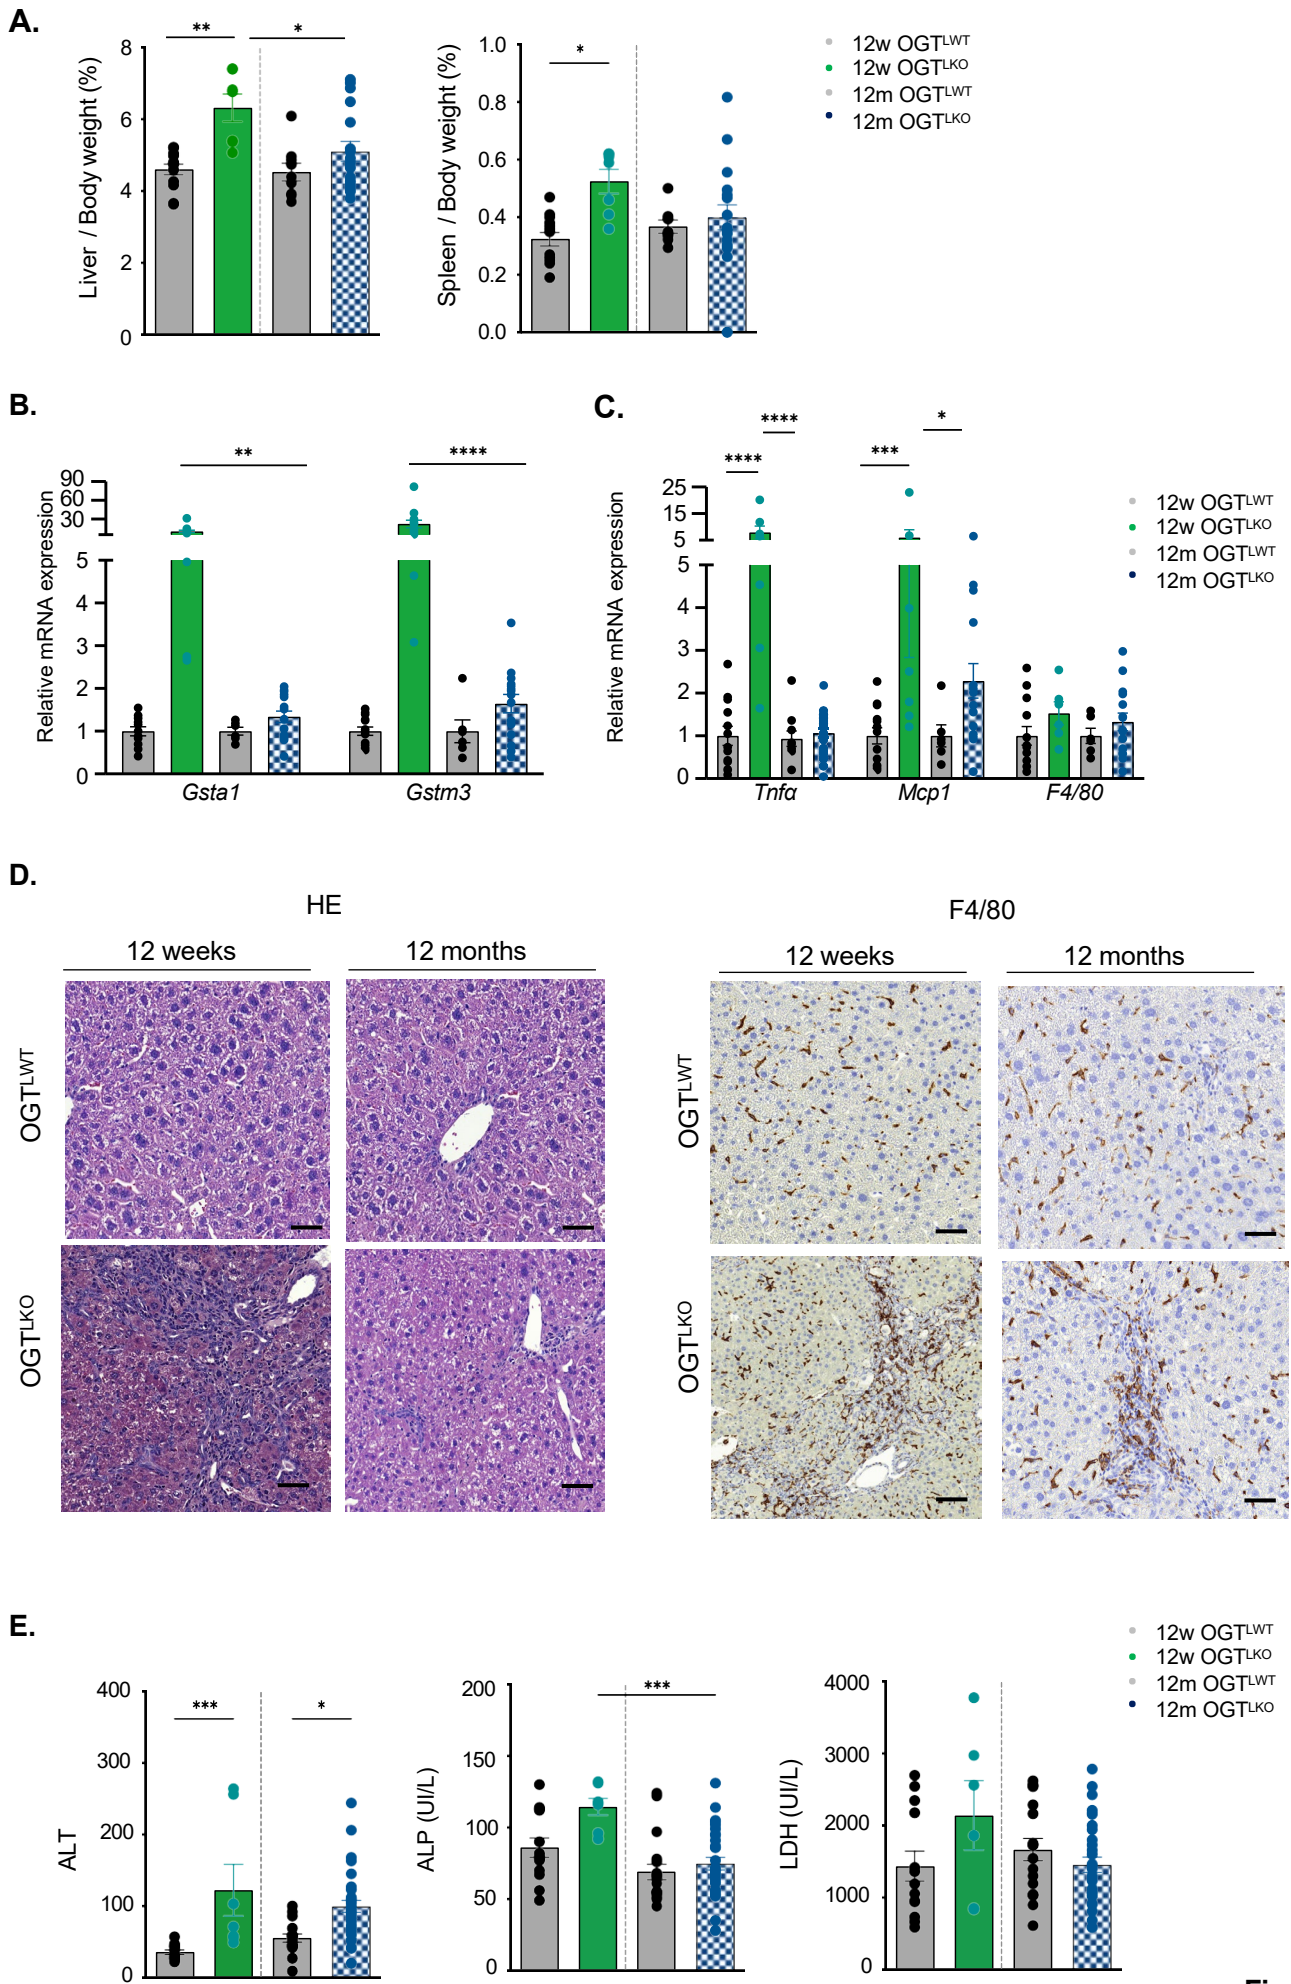

Fig. S6

**A.**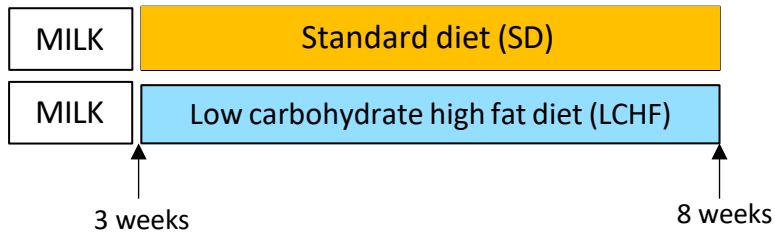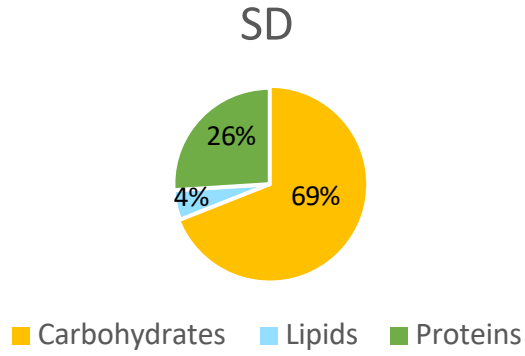**B.**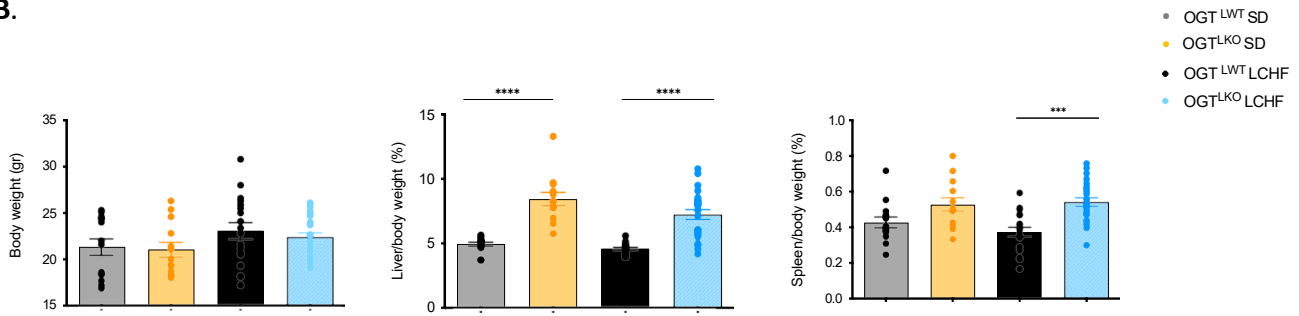**C.**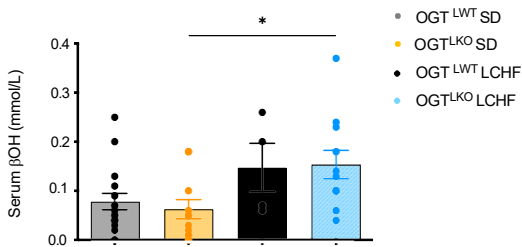**D.**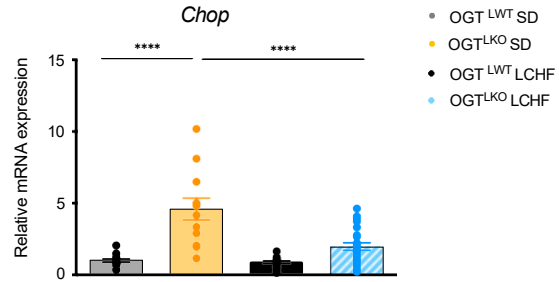**E.**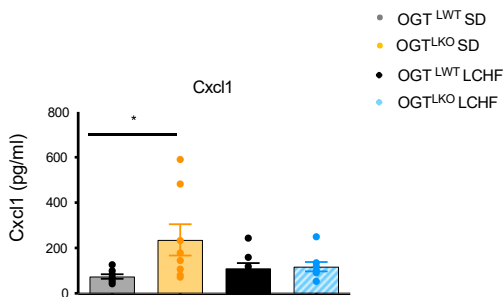**Fig. S7**

A.

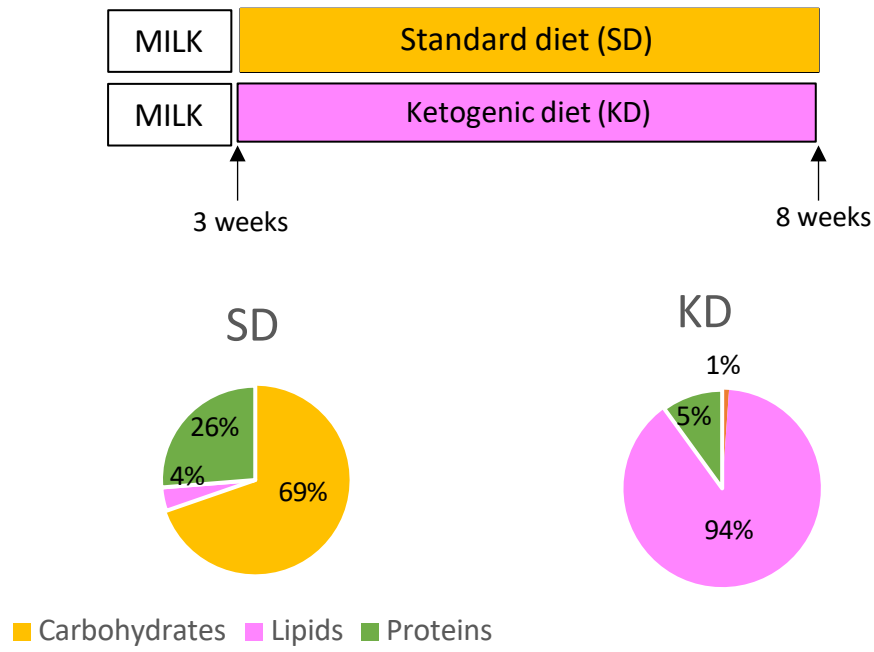

B.

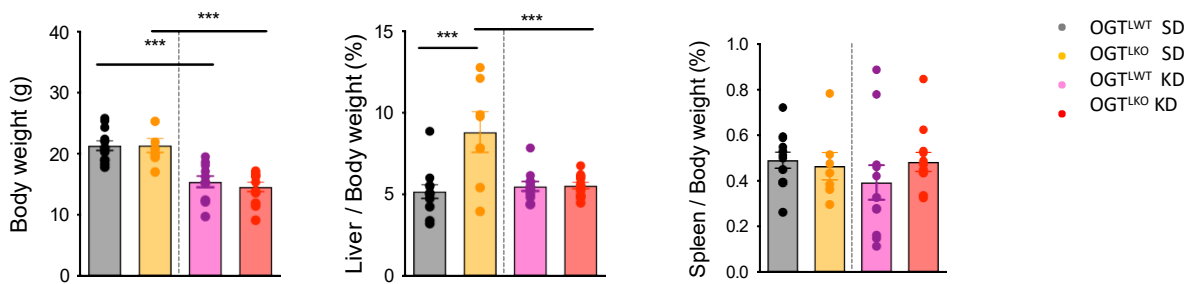

C.

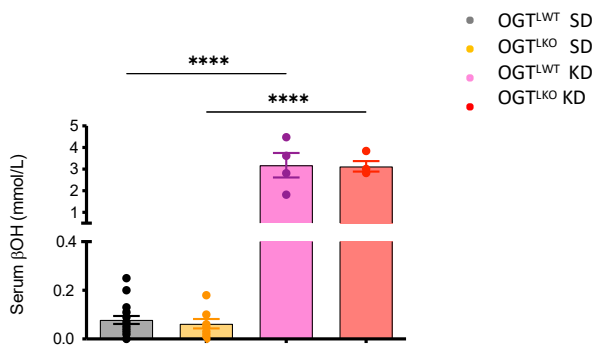

D.

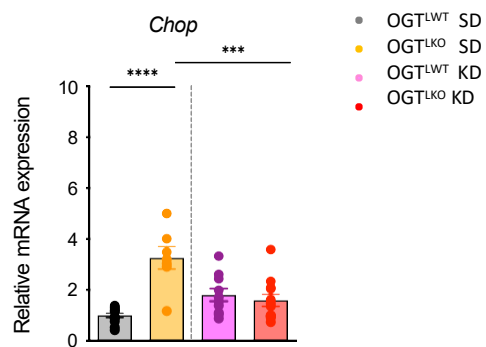

A.

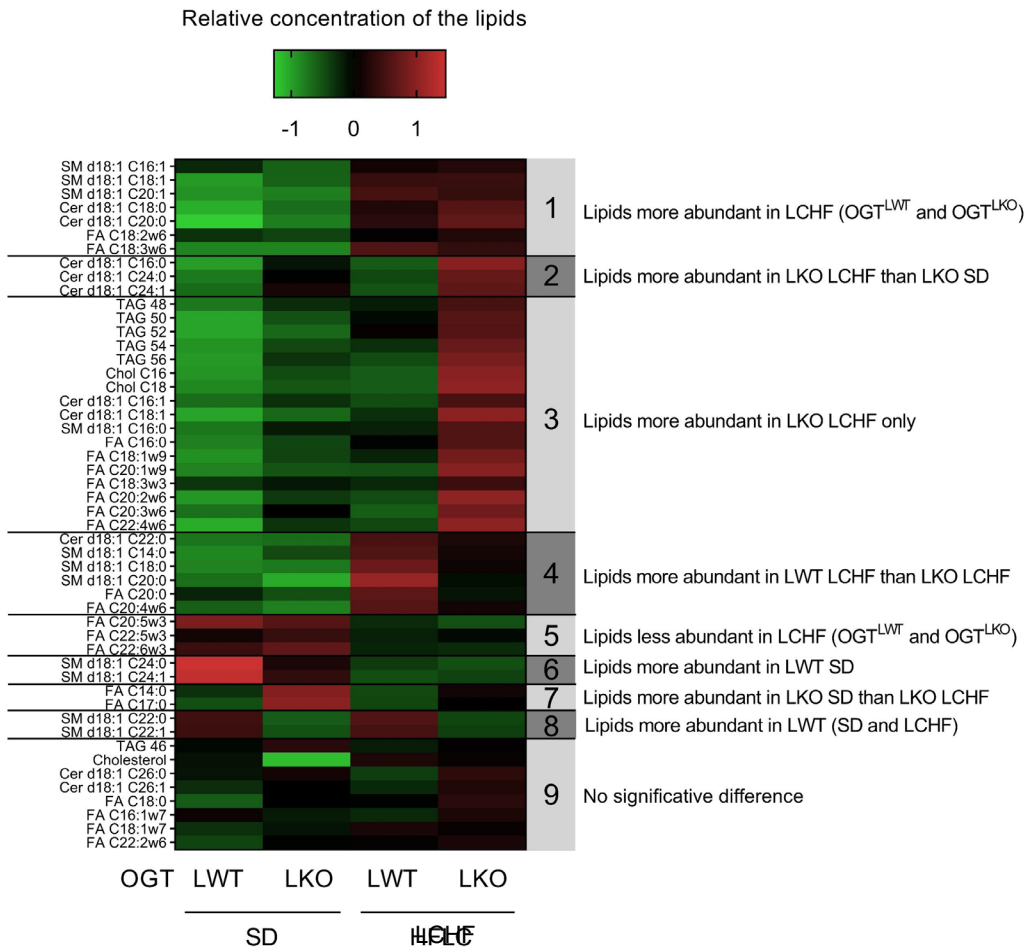

B.

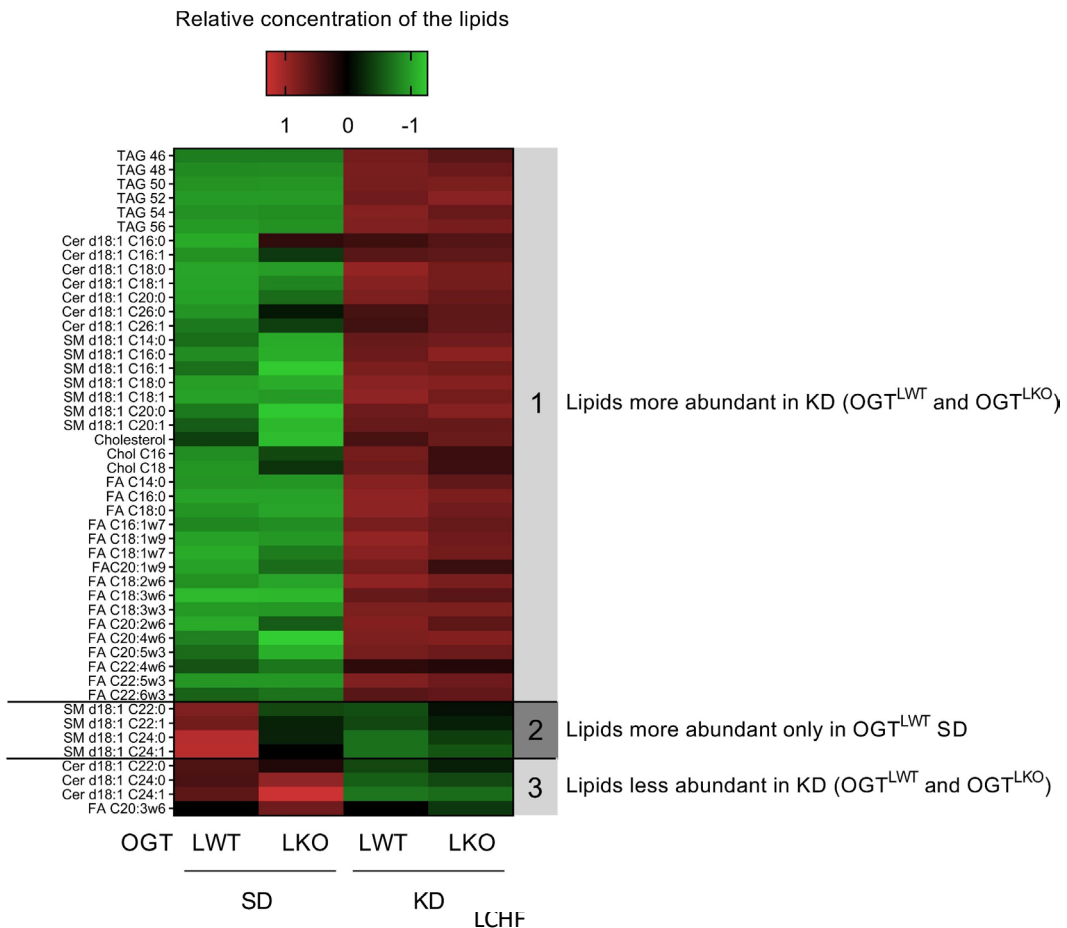

Fig. S9



## Supplementary tables

**Table S1. DE genes at 4 weeks.**

|               |                |                   |                   |
|---------------|----------------|-------------------|-------------------|
| 0610010F05Rik | C6             | Dhx38             | Gcdh              |
| 0610011F06Rik | Calml4         | Dhx58             | Gclc              |
| 1110012L19Rik | Car5a          | Dixdc1            | Gcsh              |
| 1700001C19Rik | Car5b          | Dlg3              | Gde1              |
| 1700024P16Rik | Cbr1           | Dnaic1            | Gdpd1             |
| 1810011O10Rik | Cbr3           | Dnajc2            | Gipc2             |
| 2010003K11Rik | Ccbl1          | Dnajc4            | Gm10639           |
| 9130409I23Rik | Ccdc120        | Dnpep             | Gm10768; Abcc2    |
| A1bg          | Ccl19          | Dnttip2           | Gm11437           |
| Abca3         | Ccl2           | Dpm3              | Gm13139; Znf41-ps |
| Abcb8         | Ccrl2          | Dpyd              | Gm13248           |
| Abhd14b       | Cd200r1        | Dtx3l             | Gm13251           |
| Abhd15        | Cd5l           | Dusp10            | Gm18853           |
| Abhd6         | Cdc7           | Dynll1            | Gm1966            |
| Acad12        | Cdk11b         | Ear12; Ear2; Ear3 | Gm2a              |
| Acot1         | Cdkl5          | Echdc1            | Gm3776; Gsta1     |
| Acot3         | Cenpp          | Eda2r             | Gm4794            |
| Acot4         | Ces1d          | Eif2ak2           | Gm4952            |
| Acsl1         | Ces1e          | Eif2d             | Gm4955            |
| Acss2         | Ces1f          | Eif6              | Gm7120            |
| Adar          | Ces3b          | Elovl3            | Gm8074            |
| Adgrf1        | Cidec          | Elp4              | Gpi1              |
| Adra1b        | Cisd1          | Emc10             | Gpr155            |
| Afm           | Cldn12         | Enox2             | Gpr35             |
| Afp           | Clec2d         | Enpep             | Gpt               |
| Agpat5        | Clpb           | Entpd5            | Gpx2              |
| AI464131      | Cmb1           | Epas1             | Grb7              |
| Aida          | Cmpk2          | Epb41l4b          | Grem2             |
| Akr1c12       | Cmtm6          | Ephx1             | Gsta2             |
| Akr1c13       | Cnm2           | Epsti1            | Gsta4             |
| Akr1c19       | Cnpy2          | Etfdh             | Gstk1             |
| Aldh6a1       | Coa3           | F11               | Gsto1             |
| Aph1c         | Cops7b         | Fabp5             | Gstp1             |
| Apol9a        | Cox19          | Fam131c           | Gstp2             |
| Apol9b        | Crip2          | Fam20a            | Gstt1             |
| Apom          | Cryz           | Fam210b           | Gstt3             |
| Apon          | Cxcl10         | Fam60a            | Gtf2h4            |
| Arhgap6       | Cxcl9          | Fam98a            | Gtf2ird2          |
| Arrdc4        | Cyp2a22        | Fastkd2           | Guf1              |
| Aspdh         | Cyp2a5; Cyp2a4 | Fbxo36            | Gvin1             |
| Aspg          | Cyp2c40        | Fbxo4             | Gzmd; Gzme        |
| Asrgl1        | Cyp2c69        | Fcgrt             | H2-Ke6            |

|          |            |             |               |
|----------|------------|-------------|---------------|
| Atat1    | Cyp2d37-ps | Fetub       | H2-L; H2-D1   |
| Atf3     | Cyp2f2     | Fgf21       | H2-Q1         |
| Atp2b2   | Cyp2j5     | Fgfr4       | H2-Q4         |
| Atp5e    | Cyp2u1     | Fhit        | H2-Q5         |
| Atp6v1d  | Cyp4a31    | Foxo1       | H2-Q7; H2-Q9  |
| B4galnt1 | Cyp4a32    | Foxp1       | H2-Q8; H2-Q6  |
| Bax      | Cyp4f15    | Ftsj3       | H2-T10        |
| BC021614 | Cyp4f17    | Fzd8        | H2-T22; H2-T9 |
| BC089597 | Dapk1      | Gabrb3      | Hacl1         |
| Bcl2a1a  | Dbt        | Galnt10     | Hao2          |
| Bcl2a1d  | Dcxr       | Galnt4      | Hcfc1r1       |
| Bivm     | Ddit3      | Gamt        | Heatr1        |
| Bmp1     | Ddx58      | Gbp10; Gbp6 | Herc6         |
| Bmp8b    | Ddx60      | Gbp11       | Hes6          |
| Bnip3    | Decr2      | Gbp2b; Gbp5 | Hgfac         |
| Borcs8   | Defb1      | Gbp3        | Hint2         |
| Bphl     | Dhx33      | Gbp4        | Hmox1         |
| Brix1    | Dhx37      | Gbp9        | Hn1           |

|                        |                 |         |          |                        |
|------------------------|-----------------|---------|----------|------------------------|
| Hpn                    | Mb21d1          | Pak1ip1 | Rars     | Sp4                    |
| Hps4                   | Mccc2           | Pank1   | Rbbp9    | Spats2                 |
| Hs3st3b1               | Mest            | Papss2  | Rdh11    | Sqle                   |
| Hsbp1l1                | Mgam            | Paqr9   | Rdh16    | Sqstm1                 |
| Hsd11b1                | Mgea5           | Parp12  | Reep6    | Srd5a2                 |
| Hsd17b7                | Mgll            | Parp14  | Rfc2     | Srxn1                  |
| Hsd3b1                 | Mitd1           | Parp9   | Rgs1     | Sstr2                  |
| Hspb1                  | Mlkl            | Pbld1   | Rhoc     | St6galnac6; St6galnac4 |
| Hspbap1                | Mlxpl           | Pcca    | Rhod     | Stab2                  |
| Htra2                  | Mmab            | Pccb    | Rnf213   | Stard4                 |
| Hykk                   | Mmachc          | Pcid2   | Rnf34    | Stat2                  |
| Ifi35                  | Mmp13           | Pde9a   | Rock2    | Steap2                 |
| Ifi44                  | Mndal           | Pdk1    | Rpn2     | Stx2                   |
| Ifih1                  | Mpst            | Pdxk    | Rsad2    | Sult2a8                |
| Ifit1                  | Mpv17l2         | Pecr    | Rtp4     | Sult3a1                |
| Ifit1bl1               | Mrpl24          | Peg10   | Saa3     | Suox                   |
| Ifit2                  | Mrpl34          | Pex7    | Samhd1   | Tcp11l2                |
| Ifit3                  | Ms4a4b          | Pfdn2   | Scap     | Tesk2                  |
| Ifit3b                 | Ms4a6b          | Pgd     | Scnn1a   | Tfdp2                  |
| Igfals                 | Msmo1           | Phf11a  | Sec11c   | Thoc6                  |
| Il22ra1                | Mterf3          | Phf11b  | Sell     | Thtpa; Zfhx2os         |
| Il2rg                  | Mup-ps19; Mup20 | Phkg2   | Selo     | Timm21                 |
| Impact                 | Mup20           | Phyhd1  | Sema4g   | Tlcd2                  |
| Inmt                   | Mut             | Pik3c2g | Serf1    | Tlr1                   |
| Irak1; Mir718; Mir5132 | Mx1             | Pkd2l2  | Serpine2 | Tlr2                   |
| Irf7                   | Mx2             | Pklr    | Serpinf1 | Tlr3                   |
| Irs2                   | Myc             | Plek    | Serpinf2 | Tm2d2                  |
| Isg15                  | Myo5c           | Pm20d1  | Sesn3    | Tmem184c               |
| Isoc2a                 | Myo6            | Pmvk    | Sfxn1    | Tmem256                |
| Itih1                  | N4bp2           | Pnpo    | Sfxn5    | Tmem43                 |
| Ivd                    | Nabp1           | Polr3g  | Sgsm1    | Tmem53                 |
| Kdelc1                 | Naglu           | Ppfibp2 | Shb      | Tmem97                 |
| Kif3a                  | Nampt           | Ppm1k   | Shmt1    | Tmprss2                |
| Kitl                   | Ncald; Gm15941  | Prkra   | Slc10a5  | Tnfrsf12a              |
| Klf12                  | Ndufa3          | Prlr    | Slc11a1  | Tnfsf10                |
| Klf9                   | Ndufaf3         | Prodh2  | Slc15a3  | Tor1b                  |
| Klk1b4                 | Ndufv3          | Prpf19  | Slc16a10 | Tor3a                  |
| Klkb1; Cyp4v3          | Neto2           | Prpsap1 | Slc16a12 | Tox                    |
| Kptn                   | Nit2            | Prr14   | Slc16a2  | Tprkb                  |
| Krt18                  | Nop56; Snord57  | Prss8   | Slc20a1  | Trim30a                |
| Krt20                  | Nqo1            | Prune   | Slc22a28 | Trim34b; Trim34a       |
| Krt8                   | Nr1i3           | Psemb8  | Slc22a30 | Trmt10a                |

|          |         |           |               |         |
|----------|---------|-----------|---------------|---------|
| Lage3    | Nr5a2   | Psm5      | Slc25a23      | Tsc22d3 |
| Lgals3bp | Nrg1    | Psm8      | Slc25a42      | Tsku    |
| Lilr4b   | Nt5dc1  | Ptcd3     | Slc25a51      | Ttc36   |
| Lin7a    | Nt5e    | Pter      | Slc29a1       | Ttc38   |
| Lmf1     | Nudt19  | Ptgr1     | Slc35b4       | Ttll7   |
| Lonp1    | Nudt2   | Ptprc     | Slc35c2       | Uap1l1  |
| Lrp11    | Nup133  | Pvr       | Slc35d1       | Ube2v2  |
| Lrrc3    | Nup62cl | Pwp2      | Slc35e3       | Ugdh    |
| Lrsam1   | Nxt2    | Pxmp2     | Slc44a1       | Ugp2    |
| Lsg1     | Oaf     | Pxmp4     | Slc47a1       | Ugt2a3  |
| Ly6a     | Oas1a   | Pydc3     | Slc4a7        | Ugt3a1  |
| Ly6c1    | Oas1g   | Pydc4     | Slc6a12       | Ugt3a2  |
| Ly6c2    | Oasl2   | Pygo1     | Slfn5         | Ulk2    |
| Lyar     | Odf3b   | Pyhin1    | Slfn8         | Uqcr10  |
| Mafb     | Ogfrl1  | Qdpr      | Slpi; Mir7678 | Urm1    |
| Man2b2   | Ogt     | Qsox1     | Snrpa1        | Uroc1   |
| Map2k6   | Orm1    | Rab11fip2 | Sox6          | Usp18   |
| Marchf2  | Pafah2  | Rabac1    | Sp100         | Vps28   |

Vps51; Tm7sf2

Vwa8

Wfdc2

Wfdc21

Wfdc3

Xaf1

Xdh

Yeats4

Yif1a

Zbp1

Zcchc24

Zcwpw1

Zfand4

Zfp65

Zfp729a

Zfp729b

Zpr1



**Table S2. DE genes at 8 weeks.**

|                 |                |             |                |                  |         |
|-----------------|----------------|-------------|----------------|------------------|---------|
| 1600002H07Rik   | Atp8a1         | Clstn1      | Epha3          | Gpm6a            | Klf6    |
| 1700011H14Rik   | Axl            | Cmtm3       | Epha7          | Gpm6b            | Klhl13  |
| 1700047117Rik2  | B4galt6        | Cmtm3       | Ephx4          | Gpr65            | Krt19   |
| 2210013O21Rik   | Bambi          | Col1a1      | Erich5         | Gpx3             | Krt7    |
| 2610305D13Rik   | Bcam           | Col1a2      | Etl4           | Gsn              | Lama2   |
| 6720489N17Rik   | Bcl2           | Col3a1      | Ets2           | Gstm2            | Lamb1   |
| Aadat           | Bgn            | Col6a3      | Ezr            | Gucy1a3; Mir7010 | Lamb2   |
| Abcd2           | Bicc1          | Cox18       | Fam105a        | H2-Ab1           | Lamc1   |
| Abhd2           | C1qb           | Cptp        | Fam107a        | H2-DMb1          | Lbh     |
| Abi2            | C1qc           | Creb3l1     | Fam177a        | H2-M2            | Ldb1    |
| Abi3bp          | C1qtnf7        | Crtap       | Fam180a        | Heph             | Ldhd    |
| Abr             | C3ar1          | Csf1r       | Fam19a2        | Hexa             | Lgi2    |
| Ace             | Cacnb3         | Csrp1       | Fam205a2       | Hexb             | Lgmn    |
| Acot9           | Cadm4          | Ctgf        | Fam47e         | Hgf              | Lhfp    |
| Acsf2           | Capn8          | Ctsk        | Fbln1          | Hist1h2ak        | Loxl1   |
| Actg1; Mir6935  | Car2           | Cttnbp2nl   | Fbln5          | Hnf4g            | Loxl2   |
| Adamts1         | Casc4          | Cxcr4       | Fbn1           | Hnrnpa1          | Lpar1   |
| Adamts2         | Casp12         | Cygb        | Fcgr3          | Hpgds            | Lpl     |
| Adamts5         | Cav2           | Cyp7b1      | Fcna           | Hsd3b4           | Lrrcc1  |
| Adamts9         | Cbx6           | Cyp8b1      | Fermt1         | Hsd3b4           | Ltbp4   |
| Adamtsl2        | Ccdc3          | Cysltr1     | Fgfr3          | Htra1            | Lum     |
| Add1; Mir7036b  | Ccdc80         | D17H6S56E-5 | Fgl2           | Icosl            | Ly86    |
| Adgre5; Mir1668 | Ccdc88a        | Dab2        | Fhl2           | ldh2             | Lyz2    |
| Adgrg1          | Ccnd1          | Dcdc2a      | Flrt2          | Ifi27l2a         | Macc1   |
| Adgrg6          | Cd14           | Dcn         | Fmo2           | Ifi27l2b         | Mamdc2  |
| Adh6-ps1        | Cd163          | Ddah2       | Foxq1          | Ifi30            | Maml1d1 |
| Aebp1           | Cd24a          | Ddit4l      | Frzb           | Ifngr1           | Map3k1  |
| Agpat4          | Cd300lh        | Ddr2        | Fut10          | ift57            | Map4k4  |
| Agrn            | Cd300lh        | Ddx26b      | Fxyd5; Mir7050 | Igf1r            | Marcks  |
| Ahnak; Mir6367  | Cd34           | Dkk3        | Fzd1           | Igfbp3           | Mark1   |
| AI506816        | Cd36           | Dnal1       | G2e3           | Igfbp7           | Mbnl3   |
| Aldh1a2         | Cd52           | Dock10      | G6pdx          | Ikkip            | Mboat1  |
| Angpt1          | Cd68           | Dpt         | Gabra3         | Il10rb           | Mcm6    |
| Ankrd1          | Cd74; Mir5107  | Dpy19l3     | Gabrp          | Islr             | Meis2   |
| Ano1            | Cdh6           | Dpysl2      | Galnt3         | Itga3            | Mfge8   |
| Ano6            | Cdk14          | Efemp1      | Gas6           | Itga8            | Mgat4a  |
| Antxr1          | Cerk           | Efhd2       | Gdf10          | Itga9            | Mid1    |
| Anxa13          | Chchd7         | Efnb2       | Gem            | Itgb5            | Mir3962 |
| Anxa2           | Chst15         | Egflam      | Gfpt2          | Itgb6            | Mir6950 |
| Anxa3           | Cib3           | Ehd2        | Gja1           | Itgb8            | Mir7025 |
| Aoah            | Clca3a1; Clca1 | Ehf         | Gldn           | Itgbl1           | Mir7677 |
| Apobec3         | Clca3a2; Clca2 | Elf4        | Gm10052        | Itm2c            | Mmp14   |

|                 |        |       |         |          |        |
|-----------------|--------|-------|---------|----------|--------|
| App             | Cldn4  | Emb   | Gm10600 | Itpr3    | Mmp2   |
| Arg2            | Cldn7  | Emp1  | Gm11710 | Itpripl2 | Moxd1  |
| Arhgdib         | Cldn8  | Emp2  | Gm11711 | Jag1     | Mrc2   |
| Arhgef6         | Clec4n | Emp3  | Gm11711 | Jchain   | Ms4a4a |
| Arpc1b          | Clic1  | Eng   | Gm609   | Kalrn    | Ms4a4d |
| Art4            | Clic6  | Enho  | Gng2    | Kcnma1   | Muc1   |
| Atp2b4; Mir6903 | Clmp   | Enkur | Golm1   | Kifc3    | Mxra8  |
| Atp6v0d2        | Cln6   | Epcam | Gpc3    | Klf5     | Myadm  |

|          |          |               |               |
|----------|----------|---------------|---------------|
| Mybl1    | Pcdhgc3  | Rbl1          | Tmem229b      |
| Myh9     | Pcdhgc4  | Rbm3          | Tmem45a       |
| Myo1d    | Pcdhgc5  | Rbms1         | Tmem47        |
| Myo7a    | Pde1a    | Rbms3         | Tmsb10        |
| Nav1     | Pdgfc    | Rbp1          | Tmsb4x        |
| Ncam1    | Pdgfd    | Rcn1          | Tnc           |
| Ncoa7    | Pdgfra   | Rgs2          | Tnfrsf19      |
| Ndr1     | Pdgfrb   | Rhob          | Tns1          |
| Nedd9    | Pdzk1ip1 | Rhoj          | Tns3          |
| Nek5     | Pea15a   | Rnasel        | Tox3          |
| Ngfrap1  | Pear1    | Robo1         | Tpm4          |
| Nipal1   | Phactr2  | Robo2         | Tpr           |
| Nipal2   | Phlda1   | Rragd         | Trib1         |
| Nmnat1   | Phldb2   | Rtn4          | Trove2        |
| Nox4     | Pirb     | S100a11       | Tspan3        |
| Npcd     | Pisd-ps3 | Scara3        | Tspan8        |
| Npr2     | Pkd2     | Scarf2        | Ttc3          |
| Nptxr    | Pkhd1    | Sccpdh        | Tuba1a        |
| Nt5c3b   | Plat     | Scd2; Mir5114 | Ucp2          |
| Nudt7    | Pld4     | Sdr9c7        | Ugt2b38       |
| Obp2a    | Plekha2  | Selenbp2      | Unc5b         |
| Ogn      | Plekho1  | Selm          | Veph1         |
| Olfml3   | Plet1    | Selplg        | Vgll3         |
| Osmr     | Plk2     | Sema3c        | Vim           |
| Pacs1    | Plod2    | Sema3f        | Wbp5          |
| Pam      | Plp2     | Sema5a        | Wfdc15b       |
| Pamr1    | Plxdc2   | Sema6a        | Wls           |
| Parm1    | Plxna4   | Septin11      | Wwc2          |
| Parp8    | Ppic     | Septin8       | Zeb2; Mir5129 |
| Pawr     | Ppp1r9b  | Serpnb6a      |               |
| Pbk      | Prelp    | Serpinh1      |               |
| Pcdhga1  | Prex2    | Sestd1        |               |
| Pcdhga10 | Prkch    | Sftpd         |               |
| Pcdhga11 | Prom1    | Sh2d4a        |               |
| Pcdhga12 | Prr15l   | Sh3kbp1       |               |
| Pcdhga2  | Prrg1    | Tgfb2         |               |
| Pcdhga3  | Ptger4   | Tgfb3         |               |
| Pcdhga4  | Ptgfrn   | Tgfb1         |               |
| Pcdhga5  | Ptpn13   | Thbs1         |               |
| Pcdhga6  | Ptpn14   | Thbs2         |               |
| Pcdhga7  | Ptprm    | Tiam2         |               |
| Pcdhga8  | Ptprs    | Timp2         |               |

|         |         |          |
|---------|---------|----------|
| Pcdhga9 | Pxdn    | Timp3    |
| Pcdhgb1 | Rab27b  | Tinag    |
| Pcdhgb2 | Rab31   | Tlr4     |
| Pcdhgb4 | Rab8b   | Tlr7     |
| Pcdhgb5 | Ralgds  | Tm4sf1   |
| Pcdhgb6 | Rarres1 | Tmem106a |
| Pcdhgb7 | Rasef   | Tmem173  |
| Pcdhgb8 | Rassf9  | Tmem189  |

**Table S3. DE genes common to 4 and 8 weeks.**

|                                |                |
|--------------------------------|----------------|
| 9230110C19Rik                  | lfi204         |
| 9930111J21Rik1; 9930111J21Rik2 | lfi27          |
| 9930111J21Rik2                 | lqgap1         |
| Abcb1a                         | Laptm5         |
| Adora1                         | Lenep; Flad1   |
| Aebp2                          | Lifr           |
| AI607873                       | Lilrb4a        |
| Ajuba                          | Ly6e           |
| Alcam                          | Mgst3          |
| Anxa5                          | Mmp12          |
| Bcl2a1b; Bcl2a1a               | Mnda           |
| Capsl                          | Mpv17l         |
| Ccl22                          | Ms4a4c         |
| Ccr2                           | Ms4a6c         |
| Cd180                          | Ms4a6d         |
| Cd44                           | Ms4a7          |
| Cd53                           | Myl12a         |
| Cd63                           | Myof           |
| Cd9                            | Nid1           |
| Cetn4                          | Npnt           |
| Chic1                          | Ntrk2          |
| Clec12a                        | P2ry4          |
| Clec7a                         | Pafah1b3       |
| Csprs                          | Phf11d; Phf11c |
| Ctss                           | Pla2g7         |
| Cxcl16                         | Plac8          |
| Cybb                           | Plekha1        |
| Elovl7                         | Pygb           |
| Epb41l4a                       | Retsat         |
| Evi2a; Evi2b; Gm21975          | Samd9l         |
| F2rl1                          | Septin6        |
| Fads3                          | Sirpa          |
| Fgf1                           | Slamf7         |
| Flna                           | Slamf9         |
| Fn3krp                         | Slc22a26       |
| Glipr1                         | Slc25a45       |
| Gm13212                        | Slfn2          |
| Gm2399                         | Spi1           |
| Gm3934                         | Tceal8         |
| Gm5431                         | Tcf24          |
| Gm9844                         | Tlr13          |
| Gpnmb                          | Tmem176b       |



Gstm3  
H2-Aa  
H2-DMb2  
H2-Eb1  
Haus8  
Hcls1  
Ido2  
Ifi203

Tmem19  
Tnfaip3  
Vcam1

**Table S4. Primer sequences.**

| <b>Name</b>                      | <b>Sequence</b>                 |
|----------------------------------|---------------------------------|
| <b>Ccl5 F</b>                    | CTG ACC CTG TAT AGC TTC CCT     |
| <b>Ccl5 R</b>                    | GGG ATT ACT GAG TGG CAT CC      |
| <b>Chop F</b>                    | AAG GAG AAG GAG CAG GAG AAC     |
| <b>Chop R</b>                    | GGT ACA CTT CCG GAG AGA CAG     |
| <b>Col3a1 F</b>                  | CTGTAACATGGAAACTGGGGAAA         |
| <b>Col3a1 R</b>                  | CCATAGCTGAACTGAAAACCACC         |
| <b>Col6a1 F</b>                  | CTGCTGCTACAAGCCTGCT             |
| <b>Col6a1 R</b>                  | CCCCATAAGGTTTCAGCCTCA           |
| <b>CycA2 F</b>                   | TGC CTT CAC TCA TTG CTG GA      |
| <b>CycA2 R</b>                   | TGT GGC GCT TTG AGG TAG GT      |
| <b>CycB1 F</b>                   | TGC CTT TGT CAC GGC CTT AG      |
| <b>CycB1 R</b>                   | GGA AAT TCT TGA CAA CGG TG      |
| <b>CycD F</b>                    | GCG TAC CCT GAC ACC AAT CTC     |
| <b>CycD R</b>                    | CTC CTC TTC GCA CTT CTG CTC     |
| <b>CycE F</b>                    | CAGAGCAGCGAGCAGGAGA             |
| <b>CycE R</b>                    | CAGCTGCTTCCACACCACTG            |
| <b>F4/80 F</b>                   | CTT TGG CTA TGG GCT TCC AGT C   |
| <b>F4/80 R</b>                   | GCA AGG AGG ACA GAG TTT ATC GTG |
| <b>Gpx3 F</b>                    | GCC ATT TGG CTT GGT CAT TC      |
| <b>Gpx3 R</b>                    | TGG GGA GTA TCT CCG AGT TC      |
| <b>Gpx4 F</b>                    | GCA CGA ATT CTC AGC CAA GG      |
| <b>Gpx4 R</b>                    | CAA ACT GGT TGC AGG GGA AG      |
| <b>Gclc F</b>                    | CTG CAC ATC TAC CAC GCA GT      |
| <b>Gclc R</b>                    | TTC ATG ATC GAA GGA CAC CA      |
| <b>Gss F</b>                     | GAAGCAGCTCGAAGAAGCTGG           |
| <b>Gss R</b>                     | AGCACTGGGTACTGGTGAGG            |
| <b>Gsta1 F</b>                   | CCA GAG CCA TTC TCA ACT A       |
| <b>Gsta1 R</b>                   | TGC CCA ATC ATT TCA GTC AG      |
| <b>Gstm1 F</b>                   | CTACCTTGCCCGAAAGCAC             |
| <b>Gstm1 R</b>                   | ATGTCTGCACGGATCCTCTC            |
| <b>Gstm3 R</b>                   | TGA AGG CCA TCC CTG AGA AA      |
| <b>Gstm3 F</b>                   | CTT GGG AGG AAG CGG CTA CT      |
| <b>Gstm5 R</b>                   | AGA TAC ATC GCA CGC AAG CA      |
| <b>Gstm5 F</b>                   | CCA TGT GAA TTT CCC CAG GA      |
| <b>Hnf4<math>\alpha</math> F</b> | TGCCTGCCTCAAAGCCAT              |
| <b>Hnf4<math>\alpha</math> R</b> | CACTCAGCCCCTTGGCAT              |
| <b>HO-1 F</b>                    | GTCAAGCACAGGGTGACAGA            |
| <b>HO-1 R</b>                    | ATCACCTGCAGCTCCTCAAA            |
| <b>Il-1 } F</b>                  | GGGCCTCAAAGGAAAGAATC            |
| <b>Il-1 } R</b>                  | TACCAGTTGGGGAAGCTCTGC           |

|                                 |                                 |
|---------------------------------|---------------------------------|
| <b>KI67 F</b>                   | AGG ATG GAA GCA AGC CAA CA      |
| <b>KI67 R</b>                   | GGC CCT TGG CAT ACA CAA AA      |
| <b>Krt7 F</b>                   | CACCCGGAATGAGATTGCG             |
| <b>Krt7 R</b>                   | GCACGCTGGTTCTTCAAGGT            |
| <b>Krt19 F</b>                  | TGCTGGATGAGCTGACTCTG            |
| <b>Krt19 R</b>                  | AATCCACCTCCACACTGACC            |
| <b>Mcp1 F</b>                   | TGAATGTGAAGTTGACCCGT            |
| <b>Mcp1 R</b>                   | AGAAGTGCTTGAGGTGGTTG            |
| <b>Nq01 F</b>                   | AGC GTT CGG TAT TAC GAT CC      |
| <b>Nq01 R</b>                   | AGT ACA ATC AGG GCT CTT CTC G   |
| <b>Nrf2 F</b>                   | TTC TTT CAG CAG CAT CCT CTC CAC |
| <b>Nrf2 R</b>                   | ACA GCC TTC AAT AGT CCC GTC CAG |
| <b>Oga F</b>                    | TTCACTGAAGGCTAATGGCTCCCG        |
| <b>Oga R</b>                    | TGTCACAGGCTCCGACCAAGT           |
| <b>Ogt F</b>                    | TCGCACAGCTCTGTCAAAA             |
| <b>Ogt R</b>                    | GCCCTGGGTCGCTTGGAAGA            |
| <b>Phgdh F</b>                  | GGAGGAGATCTGGCCTCTCT            |
| <b>Phgdh R</b>                  | GCACACCTTTCTTGCACTGA            |
| <b><math>\alpha</math>Sma F</b> | TGA CCC AGA TTA TGT TTG AGA CC  |
| <b><math>\alpha</math>Sma R</b> | CCA GAG TCC AGC ACA ATA CCA     |
| <b>Tbp F</b>                    | CCCCACAACCTTTCCATTCT            |
| <b>Tbp R</b>                    | GCAGGAGTGATAGGGGTCAT            |
| <b>Tgf<math>\beta</math> F</b>  | TGAGTGGCTGTCTTTTGACG            |
| <b>Tgf<math>\beta</math> R</b>  | AGTGAGCGCTGAATCGAAAG            |
| <b>Tnf<math>\alpha</math> F</b> | TGGGAGTAGACAAGGTACAACC          |
| <b>Tnf<math>\alpha</math> R</b> | CATCTTCTCAAAATTCGAGTGAC         |

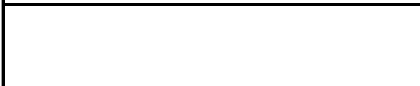

Supplement: mmc4.pdf [file mmc4.pdf]
